# Supplementary material for: Statin therapy for patients with aortic stenosis who underwent transcatheter aortic valve implantation: a report from a Japanese multicentre registry
Source: PubMed Central journal article supplement — BMJ Open. 2021 Jun 11;11(6):e044319. doi: 10.1136/bmjopen-2020-044319 (PMC8202100; doi:10.1136/bmjopen-2020-044319), 2021-06-11
Supplement: bmjopen-2020-044319.draft_revisions.pdf [file bmjopen-2020-044319.draft_revisions.pdf]

# BMJ Open

BMJ Open is committed to open peer review. As part of this commitment we make the peer review history of every article we publish publicly available.

When an article is published we post the peer reviewers' comments and the authors' responses online. We also post the versions of the paper that were used during peer review. These are the versions that the peer review comments apply to.

The versions of the paper that follow are the versions that were submitted during the peer review process. They are not the versions of record or the final published versions. They should not be cited or distributed as the published version of this manuscript.

BMJ Open is an open access journal and the full, final, typeset and author-corrected version of record of the manuscript is available on our site with no access controls, subscription charges or pay-per-view fees (<http://bmjopen.bmj.com>).

If you have any questions on BMJ Open's open peer review process please email [info.bmjopen@bmj.com](mailto:info.bmjopen@bmj.com)

# BMJ Open

## Impact of statin therapy on mid-term mortality after transcatheter aortic valve implantation: a report from a Japanese multicentre registry

|                               |                                                                                                                                                                                                                                                                                                                                                                                                                                                                                                                                                                                                                                                                                                                                                                                                                                                                                                                                                      |
|-------------------------------|------------------------------------------------------------------------------------------------------------------------------------------------------------------------------------------------------------------------------------------------------------------------------------------------------------------------------------------------------------------------------------------------------------------------------------------------------------------------------------------------------------------------------------------------------------------------------------------------------------------------------------------------------------------------------------------------------------------------------------------------------------------------------------------------------------------------------------------------------------------------------------------------------------------------------------------------------|
| Journal:                      | <i>BMJ Open</i>                                                                                                                                                                                                                                                                                                                                                                                                                                                                                                                                                                                                                                                                                                                                                                                                                                                                                                                                      |
| Manuscript ID                 | bmjopen-2020-044319                                                                                                                                                                                                                                                                                                                                                                                                                                                                                                                                                                                                                                                                                                                                                                                                                                                                                                                                  |
| Article Type:                 | Original research                                                                                                                                                                                                                                                                                                                                                                                                                                                                                                                                                                                                                                                                                                                                                                                                                                                                                                                                    |
| Date Submitted by the Author: | 08-Sep-2020                                                                                                                                                                                                                                                                                                                                                                                                                                                                                                                                                                                                                                                                                                                                                                                                                                                                                                                                          |
| Complete List of Authors:     | Yashima, Fumiaki; Saiseikai Utsunomiya Hospital; Keio University Hospital<br>Hara, Masahiko; Shimane University<br>Inohara, Taku; Vancouver General Hospital<br>Jinzaki, Masahiro ; Keio University Hospital<br>Shimizu, Hideyuki; Keio University Hospital<br>Fukuda, Keiichi; Keio University Hospital<br>Tanaka, Makoto; Keio University Hospital<br>Yamamoto, Masanori; Toyohashi Heart Center<br>Watanabe, Yusuke; Teikyo Daigaku<br>Naganuma, Toru; Shintokyo Byoin<br>Shirai, Shinichi; Kokura Kinen Byoin<br>Yamawaki, Masahiro; Saiseikai Yokohamashi Tobu Hospital<br>Tada, Norio; Sendai Kosei Byoin<br>Yamanaka, Futoshi; Shonan Kamakura General Hospital<br>Mizutani, Kazuki; Osaka City General Hospital<br>Ueno, Hiroshi; Toyama Daigaku Igakubu Daigakuin Igaku Yakugaku Kyoikubu,<br>Tabata, Minoru; Tokyo Bay Urayasu Ichikawa Iryo Center<br>Takagi, Kensuke; Ogaki Shimin Byoin<br>Hayashida, Kentaro; Keio University Hospital |
| Keywords:                     | Cardiology < INTERNAL MEDICINE, Adult cardiology < CARDIOLOGY, Valvular heart disease < CARDIOLOGY, Coronary heart disease < CARDIOLOGY                                                                                                                                                                                                                                                                                                                                                                                                                                                                                                                                                                                                                                                                                                                                                                                                              |
|                               |                                                                                                                                                                                                                                                                                                                                                                                                                                                                                                                                                                                                                                                                                                                                                                                                                                                                                                                                                      |

SCHOLARONE™  
Manuscripts

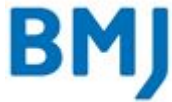

I, the Submitting Author has the right to grant and does grant on behalf of all authors of the Work (as defined in the below author licence), an exclusive licence and/or a non-exclusive licence for contributions from authors who are: i) UK Crown employees; ii) where BMJ has agreed a CC-BY licence shall apply, and/or iii) in accordance with the terms applicable for US Federal Government officers or employees acting as part of their official duties; on a worldwide, perpetual, irrevocable, royalty-free basis to BMJ Publishing Group Ltd ("BMJ") its licensees and where the relevant Journal is co-owned by BMJ to the co-owners of the Journal, to publish the Work in this journal and any other BMJ products and to exploit all rights, as set out in our [licence](#).

The Submitting Author accepts and understands that any supply made under these terms is made by BMJ to the Submitting Author unless you are acting as an employee on behalf of your employer or a postgraduate student of an affiliated institution which is paying any applicable article publishing charge ("APC") for Open Access articles. Where the Submitting Author wishes to make the Work available on an Open Access basis (and intends to pay the relevant APC), the terms of reuse of such Open Access shall be governed by a Creative Commons licence – details of these licences and which [Creative Commons](#) licence will apply to this Work are set out in our licence referred to above.

Other than as permitted in any relevant BMJ Author's Self Archiving Policies, I confirm this Work has not been accepted for publication elsewhere, is not being considered for publication elsewhere and does not duplicate material already published. I confirm all authors consent to publication of this Work and authorise the granting of this licence.

1  
2  
3 **Impact of statin therapy on mid-term mortality after transcatheter aortic valve**  
4  
5 **implantation: a report from a Japanese multicentre registry**  
6  
7  
8  
9

10 **Short title:** Statin therapy after TAVI  
11  
12  
13

14 Fumiaki Yashima, MD<sup>1,2,\*</sup>; Masahiko Hara, MD, PhD<sup>3</sup>; Taku Inohara, MD, PhD<sup>2,4</sup>; Masahiro  
15 Jinzaki, MD, PhD<sup>5</sup>; Hideyuki Shimizu, MD, PhD<sup>6</sup>; Keiichi Fukuda, MD, PhD, FACC,  
16 FESC<sup>2</sup>; Makoto Tanaka, MD<sup>2</sup>; Masanori Yamamoto, MD, PhD, FESC<sup>7,8</sup>; Yusuke Watanabe,  
17 MD<sup>9</sup>; Toru Naganuma, MD, FACC, FESC<sup>10</sup>; Shinichi Shirai, MD<sup>11</sup>; Masahiro Yamawaki,  
18 MD<sup>12</sup>; Norio Tada, MD<sup>13</sup>; Futoshi Yamanaka, MD<sup>14</sup>; Kazuki Mizutani, MD<sup>15</sup>; Hiroshi Ueno,  
19 MD<sup>16</sup>; Minoru Tabata, MD<sup>17</sup>; Kensuke Takagi, MD<sup>18</sup>; Kentaro Hayashida, MD, PhD, FESC,  
20 FACC, FJCS<sup>2</sup> on behalf of the OCEAN-TAVI registry  
21  
22  
23  
24  
25  
26  
27  
28  
29  
30  
31  
32

33 <sup>1</sup>Department of Cardiology, Saiseikai Utsunomiya Hospital, Utsunomiya, Japan  
34

35 <sup>2</sup>Department of Cardiology, Keio University School of Medicine, Tokyo, Japan  
36

37 <sup>3</sup>Center for Community-based Healthcare Research and Education, Shimane University,  
38 Izumo, Japan  
39

40 <sup>4</sup>Division of Cardiology, Vancouver General Hospital, Vancouver, Canada  
41

42 <sup>5</sup>Department of Diagnostic Radiology, Keio University School of Medicine, Tokyo, Japan  
43

44 <sup>6</sup>Department of Cardiovascular Surgery, Keio University School of Medicine, Tokyo, Japan  
45

46 <sup>7</sup>Department of Cardiology, Toyohashi Heart Centre, Toyohashi, Japan  
47

48 <sup>8</sup>Department of Cardiology, Nagoya Heart Centre, Aichi, Japan  
49

50 <sup>9</sup>Department of Cardiology, Teikyo University School of Medicine, Tokyo, Japan  
51

52 <sup>10</sup>Department of Cardiology, New Tokyo Hospital, Matsudo, Japan  
53

54 <sup>11</sup>Department of Cardiology, Kokura Memorial Hospital, Kitakyushu, Japan  
55  
56  
57  
58  
59  
60

1  
2  
3 <sup>12</sup>Department of Cardiology, Saiseikai Yokohama-City Eastern Hospital, Yokohama, Japan  
4

5 <sup>13</sup>Department of Cardiology, Sendai Kousei Hospital, Sendai, Japan  
6

7 <sup>14</sup>Department of Cardiology, Shonan Kamakura General Hospital, Kamakura, Japan  
8

9 <sup>15</sup>Department of Cardiology, Osaka City General Hospital, Osaka, Japan  
10

11 <sup>16</sup>Department of Cardiology, Toyama University Hospital, Toyama, Japan  
12

13 <sup>17</sup>Department of Cardiovascular Surgery, Tokyo Bay Urayasu Ichikawa Medical Center,  
14

15 Urayasu, Japan  
16

17 <sup>18</sup>Department of Cardiology, Ogaki Municipal Hospital, Ogaki, Japan  
18

19  
20  
21  
22  
23 **\*Corresponding author**

24 Fumiaki Yashima, MD, PhD  
25

26 Department of Cardiology, Saiseikai Utsunomiya Hospital,  
27

28 911-1 Takebayashi-cho, Utsunomiya, Tochigi, 321-0974, Japan  
29

30 Phone: 81-28-626-5500; Fax: 81-28-626-5573  
31

32 Email: yashima.fumiaki@gmail.com  
33  
34  
35  
36  
37  
38  
39

40 **Word count: 2591**  
41  
42  
43  
44  
45  
46  
47  
48  
49  
50  
51  
52  
53  
54  
55  
56  
57  
58  
59  
60

## Abstract

**Objectives** Data on statin therapy for patients with aortic stenosis after transcatheter aortic valve implantation (TAVI) are limited. The present study aimed to evaluate the impact of statin therapy on mid-term mortality after TAVI.

**Design** Observational study.

**Setting** This study evaluated the impact of statin therapy after TAVI using data from a large patient cohort of a Japanese multicentre registry including 14 centres.

**Participants** The overall cohort included 2588 very elderly patients (84.4±5.2 years); the majority were women (69.3%).

**Interventions** Patients with severe aortic stenosis who underwent TAVI between 2013 and 2017 were classified into the statin and the non-statin group (1523 and 1065 patients, respectively) based on statin therapy at admission.

**Primary and secondary outcome measures** After 1:1 propensity score matching, we identified 936 matched pairs and assessed all-cause and cardiovascular mortality between the two groups. The outcomes were defined according to the Valve Academic Research Consortium-2 consensus statement.

**Results** The median follow-up period was 660 days. Statin therapy was associated with a significant reduction in all-cause mortality (adjusted hazard ratio [aHR] 0.76, 95% confidence interval [CI] 0.58–0.99,  $P=0.04$ ) and cardiovascular mortality (aHR 0.64, 95% CI 0.42–0.97,  $P=0.04$ ). In the octogenarians, statin therapy was associated with significantly lower all-cause mortality ( $P=0.04$ ); however, the impact in the nonagenarians appeared to be lower ( $P=0.25$ ). Comparing four groups according to previous coronary artery disease (CAD) and statin therapy, there was a significant difference in all-cause mortality ( $P<0.01$ ). Patients who did not receive statin despite previous CAD showed the worst prognosis.

1  
2  
3 **Conclusions** Statin therapy after TAVI was associated with significant reductions in all-cause  
4 and cardiovascular mortality after propensity score matching. Statin therapy after TAVI will  
5 be beneficial even in octogenarians, but the benefits may disappear in nonagenarians. In  
6 addition, statin therapy will be essential for TAVI patients with CAD.  
7  
8  
9  
10  
11  
12  
13

14 **Keywords:** coronary artery disease, elderly, propensity score matching, statin, transcatheter  
15 aortic valve implantation  
16  
17  
18  
19  
20  
21  
22

### 23 **Strengths and limitations of this study**

- 24 ● The present study showed that statin therapy after transcatheter aortic valve implantation  
25 was associated with significant reductions in all-cause and cardiovascular mortality using  
26 data from a large patient cohort of a multicentre registry.  
27
- 28 ● This was the first study to investigate a difference in the statin effect among  
29 octogenarians and nonagenarians.  
30
- 31 ● The present study clearly demonstrated how the impact of statin therapy differed  
32 according to the underlying coronary artery disease.  
33
- 34 ● Unknown and unmeasurable factors may have confounded the relationship between  
35 statin therapy and mortality due to the nature of an observational study.  
36
- 37 ● We could not assess intolerance in patients eligible for statin treatment but who could not  
38 continue treatment due to statin side effects.  
39  
40  
41  
42  
43  
44  
45  
46  
47  
48  
49  
50  
51  
52  
53  
54  
55  
56  
57  
58  
59  
60

## INTRODUCTION

Transcatheter aortic valve implantation (TAVI) is an established treatment for severe aortic stenosis (AS).[1, 2, 3, 4] However, long-term survival after TAVI is not satisfactory, as shown in a meta-analysis including 31 studies; 5-year and 7-year survival rates were 48% and 28%, respectively.[5] TAVI patients are very elderly and have many cardiovascular comorbidities such as coronary artery disease (CAD), stroke, and peripheral artery disease (PAD).[1, 2, 6] Therefore, adjunctive optimal medical therapy is required to improve prognosis after TAVI. Statin therapy is expected to reduce cardiovascular risk and mortality in patients who have undergone TAVI; however, data on statin therapy after TAVI are limited. A report from the Placement of Aortic Transcatheter Valve II (PARTNER II) and Sapien 3 clinical trials or associated registries showed that statin therapy was associated with a lower 2-year mortality rate compared to patients not on statin therapy.[7] However, the study did not demonstrate any differences in the statin effect among octogenarians and nonagenarians, and did not evaluate whether the impact of statin therapy would differ according to the underlying CAD. Therefore, the present study aimed to evaluate the impact of statin therapy on mid-term mortality after TAVI and its association with age and the underlying CAD, using our Japanese multicentre registry data.

## METHODS

### Study population and design

All patients with severe AS who underwent TAVI at 14 Japanese centres (Keio University Hospital, Teikyo University Hospital, Toyohashi Heart Centre, Nagoya Heart Centre, New Tokyo Hospital, Kokura Memorial Hospital, Saiseikai Yokohama City Eastern Hospital, Sendai Kosei Hospital, Shonan Kamakura General Hospital, Osaka City University Graduate School of Medicine, Kishiwada Tokushukai Hospital, Toyama University Hospital, Tokyo



1  
2  
3 Bay Urayasu Ichikawa Medical Center, and Ogaki municipal hospital) between 2013 and  
4  
5 2017 were prospectively included in our TAVI registry (Optimized CathEter vAlvular  
6  
7 iNtervention [OCEAN-TAVI] registry).[8, 9, 10] Informed consent was obtained from all  
8  
9 patients, and the institutional review boards of all 14 participating centres approved this study.  
10  
11 Additionally, this study was conducted in accordance with the ethical guidelines of the 1975  
12  
13 Declaration of Helsinki. The OCEAN-TAVI registry was registered with the University  
14  
15 Hospital Medical Information Network Clinical Trial Registry and accepted by the  
16  
17 International Committee of Medical Journal Editors (UMIN-ID: 000020423).  
18  
19  
20

21 Patients received transcatheter heart valves (THVs) via either the transfemoral,  
22  
23 transapical, or transaortic approach. Sapien XT valves, Sapien 3 valves (Edwards  
24  
25 Lifesciences, Irvine, CA), CoreValves, Evolut R (Medtronic, Minneapolis, MN) were used as  
26  
27 THVs. A total of 2588 patients were treated with TAVI between 2013 and 2017. They were  
28  
29 categorised into two groups according to statin administration at admission for TAVI  
30  
31 procedures (Figure 1). We set the primary endpoint as mid-term all-cause mortality for up to 3  
32  
33 years. Secondary endpoints included mid-term cardiovascular mortality, mid-term non-  
34  
35 cardiovascular mortality up to 3 years, and 30-day all-cause mortality. We assessed  
36  
37 differences in the endpoints between the two groups. Furthermore, we performed propensity  
38  
39 score (PS) matching, as described below, and compared the endpoints between the matched  
40  
41 groups. In addition, we categorised the matched cohort into two cohorts; an octogenarian  
42  
43 cohort (80–89 years old) and a nonagenarian cohort (90 years or older), and investigated the  
44  
45 differences by age in the impact of statin on mid-term all-cause mortality. Furthermore, we  
46  
47 classified the overall cohort into four groups according to a history of CAD and statin  
48  
49 treatment at admission and evaluated whether the impact of statin differed according to the  
50  
51 underlying CAD condition.  
52  
53  
54  
55  
56  
57  
58  
59  
60

1  
2  
3 Clinical outcomes including all-cause mortality and cardiovascular mortality were  
4 defined according to the Valve Academic Research Consortium-2 consensus document.[11]  
5  
6

### 7 **Statistical analysis**

8  
9  
10 Continuous variables are expressed as mean±standard deviation (SD), and categorical  
11 variables are expressed as percentages. Continuous variables were compared using the  
12 Wilcoxon rank-sum test. The chi-squared test was used to compare categorical variables.  
13  
14 Survival curves up to 3 years were presented as Kaplan-Meier curves, and the log-rank test  
15 was used for comparison of the statin and non-statin groups. Cox multivariable regression  
16 analyses were performed to identify independent correlates for mid-term all-cause mortality.  
17  
18

19  
20 PS matching[12, 13] was used to account for differences in baseline characteristics. The  
21 PS was calculated for each patient using a logistic regression model to predict stratification  
22 into the statin group based on the following variables: age; sex; body surface area; smoking;  
23 diabetes; hypertension; previous history of CAD, myocardial infarction (MI), percutaneous  
24 coronary intervention, coronary artery bypass grafting, stroke, PAD; atrial fibrillation;  
25 estimated glomerular filtration rate; haemoglobin level; renin-angiotensin inhibitor treatment  
26 at admission; New York Heart Association (NYHA) class 3 or 4; Clinical Frailty Scale[8];  
27 and Society of Thoracic Surgeons (STS) risk score. PS matching was performed using 1:1  
28 matching without replacement, with the calliper width equal to 0.2 SD of the PS logit. The  
29 balance between the statin and non-statin groups in the matched cohort was estimated using  
30 absolute standardised difference. Multivariable cox regression analyses were performed to  
31 assess the impact of statin on the clinical outcomes. In addition to the PS matching model, we  
32 built a multivariable model by inverse probability of treatment weighting (IPTW) using the  
33 PS.[14] Time-to-event variables were reported using Kaplan-Meier estimations. All reported  
34 *P*-values were two-sided, and a *P*-value <0.05 was considered statistically significant. All  
35  
36  
37  
38  
39  
40  
41  
42  
43  
44  
45  
46  
47  
48  
49  
50  
51  
52  
53  
54  
55  
56  
57  
58  
59  
60

1  
2  
3 statistical analyses were performed using the R software package (version 3.3.2; R  
4  
5 Development Core Team, Vienna, Austria).  
6  
7  
8  
9

## 10 11 **Patient and Public Involvement statement**

12  
13  
14 Patients were first involved in the research when they underwent TAVI and registered  
15  
16 to the OCEAN-TAVI registry through the web-based data collection system. Research  
17  
18 questions and outcome measures were developed by the OCEAN-TAVI registry  
19  
20 investigators. Patients were informed about the registration. They were asked to assess  
21  
22 the burden of the intervention and time required to participate in the research.  
23  
24 Information of the registry and the study results are available on the website of the  
25  
26 OCEAN-TAVI registry.  
27  
28  
29  
30  
31  
32  
33

## 34 35 **Results**

36  
37 Among the 2588 patients who underwent TAVI, 1523 and 1065 patients were classified into  
38  
39 the statin and the non-statin group, respectively (Figure 1). The distribution of PS in the statin  
40  
41 and non-statin groups is shown in Supplementary material online, Figure S1. After 1:1 PS  
42  
43 matching, we identified 936 matched pairs of patients with similar PS. The patient  
44  
45 characteristics of the statin and non-statin groups before and after matching are summarised in  
46  
47 Table 1. The overall cohort included very elderly patients (84.4±5.2 years). The majority of  
48  
49 the cohort was female (69.3%). After PS matching, the two groups were well-balanced in  
50  
51 terms of pre-procedural patient characteristics and procedural variables. In-hospital all-cause  
52  
53 mortality, acute kidney injury, stroke, and vascular complications did not differ between the  
54  
55 two groups. Post-procedural echocardiography data showed no significant differences  
56  
57  
58  
59  
60

1  
2  
3 between the two groups (Table 2). The patient characteristics and in-hospital outcomes of the  
4  
5 PS matched and unmatched groups are summarised in Supplementary material online, Tables  
6  
7 S1 and S2. There were several differences between the two groups. The proportion of male  
8  
9 patients was lower in the PS matched group than in the unmatched group (532 [28.4%] vs.  
10  
11 263 [36.7%],  $P<0.01$ ), NYHA Class 3 or 4 was less frequent in the matched group (919  
12  
13 [49.1%] vs. 402 [56.2%],  $P<0.01$ ), the Clinical Frailty Scale was lower in the matched group  
14  
15 [3.8±1.2 vs. 4.2±1.4,  $P<0.01$ ), and the STS risk score was lower in the matched group  
16  
17 (7.7±5.7 vs 9.8±9.2,  $P<0.01$ ). History of the previous CAD was more frequent (750 [40.1%]  
18  
19 vs. 204 [28.5%],  $P<0.01$ ), but previous MI was less frequent (96 [5.1%] vs. 62 [8.7%],  
20  
21  $P<0.01$ ) in the PS matched group. In-hospital all-cause mortality (43 [2.3%] vs. 27 [3.8%],  
22  
23  $P<0.01$ ) and bleeding (421 [22.5%] vs. 199 [27.8%],  $P<0.01$ ) were lower in the matched  
24  
25 group than in the unmatched group.

26  
27  
28  
29  
30 In the overall cohort, the median follow-up period was 660 days. Statin therapy was  
31  
32 associated with significantly lower mid-term all-cause mortality in the PS-matched cohort  
33  
34 (adjusted hazard ratio [aHR] 0.76, 95% confidence interval [CI] 0.58–0.99,  $P=0.04$ ) (Figure  
35  
36 2a), which was consistent with the IPTW model (aHR 0.80, 95% CI 0.65–0.99,  $P=0.04$ ). The  
37  
38 Kaplan-Meier curves relative to the mid-term outcomes additionally showed significant  
39  
40 differences in cardiovascular mortality (aHR 0.64, 95% CI 0.42–0.97,  $P=0.04$ ) and non-  
41  
42 cardiovascular mortality (aHR 0.86, 95% CI 0.61–1.21,  $P=0.39$ ) between the two groups  
43  
44 (Figure 2b and 2c). There was no significant difference in 30-day all-cause mortality ( $P=0.11$ )  
45  
46 and a landmark analysis after 30 days showed a significant difference in mid-term all-cause  
47  
48 mortality ( $P=0.03$ ) (Figure 2d).

49  
50  
51  
52  
53 In the octogenarian cohort (80–89 years old), statin therapy was associated with  
54  
55 significantly lower mid-term all-cause mortality ( $P=0.04$ ) (Figure 3a), but the impact in the  
56  
57 nonagenarian cohort (90 years or older) appeared to be lower ( $P=0.25$ ) (Figure 3b).

1  
2  
3 Furthermore, comparing the four groups according to previous CAD and statin therapy,  
4 there was a significant difference in mid-term all-cause mortality ( $P<0.01$ ) (Figure 4).  
5

6  
7 Patients who did not receive statin therapy despite a history of previous CAD showed the  
8 worst prognosis. Their survival curve diverged from that of the patients without previous  
9 CAD or statin after 1 year. In addition, patients with previous CAD and statin therapy seemed  
10 to obtain similar risks with those who did not have previous CAD or statin therapy.  
11  
12  
13  
14  
15  
16  
17  
18

## 19 DISCUSSION

20  
21 The present study investigated the impact of statin therapy on mid-term mortality after TAVI  
22 using a Japanese multicentre registry. Statin therapy was associated with significantly lower  
23 all-cause and cardiovascular mortality. It should be noted that the impact of statin therapy  
24 attenuated in the nonagenarians. Furthermore, we demonstrated differences in all-cause  
25 mortality according to the history of previous CAD and statin therapy. The present study  
26 included the largest patient cohort (936 pairs of patients after PS matching) and the first report  
27 to investigate the association of age and a history of previous CAD with the impact of statin.  
28  
29  
30  
31  
32  
33  
34  
35  
36

37 Few reports have assessed the impact of statin treatment on mortality after TAVI. Peri-  
38 Okonny et al. demonstrated that statin therapy was associated with reductions in 2-year all-  
39 cause (aHR 0.65, 95% CI 0.49–0.87,  $P=0.001$ ), cardiovascular (aHR 0.66, 95% CI 0.46–0.96,  
40  $P=0.030$ ), and non-cardiovascular mortality (aHR 0.64, 95% CI 0.44–0.99,  $P=0.045$ )  
41 compared with no statin therapy, with a large cohort using PARTNER II and Sapien 3 clinical  
42 trials or associated registries (626 pairs of patients after PS matching).[7] Merdler et al.  
43 showed that high-intensity statin therapy was associated with a reduction in mortality after  
44 TAVI (median follow-up period: 2.5 years) using data of 1238 cases from a single-centre  
45 registry (aHR 0.59, 95% CI 0.37–0.96,  $P=0.03$ ).[15] Huded et al. also showed that high-  
46 intensity statin therapy was associated with a reduction in all-cause mortality (mean survival:  
47  
48  
49  
50  
51  
52  
53  
54  
55  
56  
57  
58  
59  
60

1  
2  
3 3.9 years) based on 294 cases (aHR 0.36, 95% CI 0.14–0.90,  $P=0.029$ ).[16] Takagi et al.  
4  
5 reported similar results following a meta-analysis.[17] These results were consistent with our  
6  
7 results.  
8  
9

10 The mechanism through which statin therapy reduces the risks of all-cause and  
11 cardiovascular mortality is thought to be associated with a reduction in ischaemic events.[7,  
12 13 15, 16, 17] However, there are limited data relative to statin therapy in octogenarians and  
14 nonagenarians, as are data not only on TAVI but also on statin therapy as primary and  
15 secondary prevention. The PROspective Study of Pravastatin in the Elderly at Risk trial was  
16 the only randomised controlled trial for elderly patients (aged 70–82 years) with a history or  
17 risk factors of vascular disease. The study revealed that pravastatin led to a 3-year reduced  
18 risk of CAD.[18] Recommendation of statin therapy for very elderly patients varies among  
19 the guidelines.[19, 20, 21, 22, 23] Very recently, a few reports supporting statin therapy for  
20 very elderly patients have been published. In the Patient and Provider Assessment of Lipid  
21 Management Registry, statin therapy appeared to be similarly tolerated by patients older and  
22 younger than 75 years.[24] The Cholesterol Treatment Trialists' Collaboration demonstrated  
23 that statin therapy as primary and secondary prevention produced significant reductions in  
24 major vascular events even in patients older than 75 years.[25] Furthermore, Romas et al.  
25 revealed that statin therapy was associated with significant reductions in atherosclerotic CVD  
26 and all-cause mortality for patients who were older than 74 years and had diabetes.[26]  
27 Interestingly, Giral et al. demonstrated that statin discontinuation in 75-year-old primary  
28 prevention patients was associated with a 33% increased risk of cardiovascular events.[27]  
29 Our present study was consistent with these reports and indicated that statin therapy would be  
30 effective for very elderly and atherosclerotic high-risk patients by reducing cardiovascular  
31 events and mortality. Conversely, Romas et al. reported that the benefits of statin therapy  
32 disappeared in nonagenarians,[26] as observed in our nonagenarian cohort.  
33  
34  
35  
36  
37  
38  
39  
40  
41  
42  
43  
44  
45  
46  
47  
48  
49  
50  
51  
52  
53  
54  
55  
56  
57  
58  
59  
60

1  
2  
3 The statin effect generally appears after 1 year compared with placebo.[7, 28] Patients  
4 with a history of previous CAD who did not receive statin therapy appeared to have higher  
5 mortality rates after 1 year in the present study. In addition, our analysis the combining  
6 history of previous CAD and statin therapy implied that TAVI patients with the previous  
7 CAD might be able to achieve a similar reduction in mortality risk as those patients who had  
8 no previous CAD or statin treatment.  
9

10  
11  
12  
13  
14  
15  
16  
17 The present study had some limitations. First, this is an observational study, and  
18 unknown and unmeasurable factors may have confounded the relationship between statin  
19 therapy and mortality. However, a multicentre approach enabled us to accumulate a relatively  
20 large number of patients and we used PS matching analysis and the IPTW model to confirm  
21 the robustness of the results. Second, a generalisation of the present results may be slightly  
22 limited due to the differences between the matched and unmatched group, but might be  
23 plausible given the results of the IPTW model. Third, information on the type and doses of  
24 statin therapy was not obtained. Usage of ezetimibe or proprotein convertase subtilisin/kexin  
25 type 9 inhibitor was not recorded in this study. Fourth, we assessed statin use only on  
26 admission and there was a possibility that statin therapy might have changed at discharge or  
27 during follow-up. Finally, we could not assess intolerance in patients eligible for statin  
28 treatment but who could not continue treatment due to statin side effects such as  
29 rhabdomyolysis. Further studies, including a randomised controlled trial, on statin therapy  
30 following TAVI are warranted to resolve these limitations.  
31  
32  
33  
34  
35  
36  
37  
38  
39  
40  
41  
42  
43  
44  
45  
46  
47  
48

49 In conclusion, using data from the large multicentre registry, statin therapy after TAVI  
50 was associated with significant reductions in mid-term all-cause and cardiovascular mortality.  
51 Statin therapy after TAVI will be beneficial even in octogenarians, but the benefits may  
52 disappear in nonagenarians. In addition, statin therapy will be essential for TAVI patients  
53 with CAD.  
54  
55  
56  
57  
58  
59  
60

### **Acknowledgements**

We express our heartfelt gratitude to the team members at our hospital and other hospitals participating in the multicentre registry and the Japan Society of Clinical Research (<http://www.japanscr.org/>) for their dedicated support.

### **Funding**

The OCEAN-TAVI registry is supported by Edwards Lifesciences, Medtronic, Boston Scientific, Abbott Medical, and Daiichi-Sankyo Company. There are no award/grant numbers for the Funders.

### **Conflict of interest**

Drs. Yamamoto, Tada, Naganuma, Shirai, Mizutani, Tabata, Ueno, and Watanabe are clinical proctors for Edwards Lifesciences and Medtronic. Drs. Shimizu, Takagi and Hayashida are clinical proctors of Edwards Lifesciences. Dr. Inohara received a research grant from Boston Scientific. Dr. Kohsaka received lecture fees and research grants from Pfizer Japan, Bayer, Daiichi Sankyo, and Bristol-Myers Squibb. The remaining authors have nothing to disclose.

### **Data availability**

The data underlying this article cannot be shared publicly due to the privacy of individuals that participated in the study. The data will be shared on reasonable request to the corresponding author.

### **Authors' contributions**

Conception or design of the work: Fumiaki Yashima, Shinichi Shirai, Toru Naganuma, Kazuki Mizutani, Motoharu Araki, Minoru Tabata, and Futoshi Yamanaka.



1  
2  
3 Data collection: Makoto Tanaka, Masahiro Jinzaki, Hideyuki Shimizu, and Keiichi Fukuda.

4  
5 Data analysis and interpretation: Masahiko Hara, Taku Inohara, Kensuke Takagi, Hiroshi  
6  
7 Ueno, and Norio Tada.

8  
9  
10 Drafting the article: Fumiaki Yashima and Taku Inohara.

11  
12 Critical revision of the article: Masanori Yamamoto, Yusuke Watanabe, Kentaro Hayashida.

13  
14 Final approval of the version to be published: all authors.  
15  
16  
17  
18  
19  
20  
21  
22  
23  
24  
25  
26  
27  
28  
29  
30  
31  
32  
33  
34  
35  
36  
37  
38  
39  
40  
41  
42  
43  
44  
45  
46  
47  
48  
49  
50  
51  
52  
53  
54  
55  
56  
57  
58  
59  
60

For peer review only

## References

- 1 Mack MJ, Leon MB, Smith CR, et al. PARTNER 1 trial investigators, 5-year outcomes of  
2 transcatheter aortic valve replacement or surgical aortic valve replacement for high surgical  
3 risk patients with aortic stenosis (PARTNER 1): a randomised controlled trial. *Lancet*  
4 2015;385:2477–84.
- 5  
6  
7  
8  
9  
10  
11  
12  
13  
14  
15  
16  
17  
18  
19  
20  
21  
22  
23  
24  
25  
26  
27  
28  
29  
30  
31  
32  
33  
34  
35  
36  
37  
38  
39  
40  
41  
42  
43  
44  
45  
46  
47  
48  
49  
50  
51  
52  
53  
54  
55  
56  
57  
58  
59  
60
- 2 Kapadia SR, Leon MB, Makkar RR, et al. 5-year outcomes of transcatheter aortic valve  
replacement compared with standard treatment for patients with inoperable aortic stenosis  
(PARTNER 1): a randomised controlled trial. *Lancet* 2015;385:2485–91.
- 3 Popma JJ, Deeb GM, Yakubov SJ et al. Transcatheter aortic-valve replacement with a self-  
expanding valve in low-risk patients. *N Engl J Med* 2019;380:1706–15.
- 4 Mack MJ, Leon MB, Thourani VH, et al. Transcatheter aortic-valve replacement with a  
balloon-expandable valve in low-risk patients. *N Engl J Med* 2019;380:1695–705.
- 5 Chakos A, Wilson-Smith A, Arora S, et al. Long term outcomes of transcatheter aortic  
valve implantation (TAVI): a systematic review of 5-year survival and beyond. *Ann*  
*Cardiothorac Surg* 2017;6:432–43.
- 6 Holmes DR Jr, Brennan JM, Rumsfeld JS, et al. Clinical outcomes at 1 year following  
transcatheter aortic valve replacement. *JAMA* 2015;313:1019–28.
- 7 Peri-Okonny PA, Liu Y, Malaisrie SC, et al. Association of statin use and mortality after  
transcatheter aortic valve replacement. *J Am Heart Assoc* 2019;8:e011529.
- 8 Shimura T, Yamamoto M, Kano S, et al. Impact of the Clinical Frailty Scale on outcomes  
after transcatheter aortic valve replacement. *Circulation* 2017;135:2013–24.
- 9 Yashima F, Yamamoto M, Tanaka M, et al. Transcatheter aortic valve implantation in  
patients with an extremely small native aortic annulus: the OCEAN-TAVI registry. *Int J*  
*Cardiol* 2017;240:126–31.

- 1  
2  
3 10 Kataoka A, Watanabe Y, Kozuma K, et al. Prognostic impact of low-flow severe aortic  
4 stenosis in small-body patients undergoing TAVR: the OCEAN-TAVI registry. *JACC*  
5  
6 *Cardiovasc Imaging* 2018;11:659–69.  
7  
8  
9  
10 11 Kappetein AP, Head SJ, Genereux P, et al. Updated standardized endpoint definitions for  
11 transcatheter aortic valve implantation: the Valve Academic Research Consortium-2  
12  
13 consensus document. *J Am Coll Cardiol* 2012;60:1438–54.  
14  
15  
16  
17 12 Rosenbaum PR, Rubin DB. The central role of the propensity score in observational  
18  
19 studies for causal effects. *Biometrika* 1983;70:41–55.  
20  
21  
22 13 Weitzen S, Lapane KL, Toledano AY, et al. Principles for modeling propensity scores in  
23  
24 medical research: a systematic literature review. *Pharmacoepidemiol Drug Saf* 2004;13:841–  
25  
26 53.  
27  
28  
29 14 Austin PC. The performance of different propensity score methods for estimating marginal  
30  
31 hazard ratios. *Stat Med* 2013;32:2837–49.  
32  
33  
34 15 Merdler I, Rozenbaum Z, Finkelstein A, et al. Effect of statin therapy and long-term  
35  
36 mortality following transcatheter aortic valve implantation. *Am J Cardiol* 2019;123:1978–82.  
37  
38  
39 16 Huded CP, Benck LR, Stone NJ, et al. Relation of intensity of statin therapy and outcomes  
40  
41 after transcatheter aortic valve replacement. *Am J Cardiol* 2017;119:1832–38.  
42  
43  
44 17 Takagi H, Hari Y, Nakashima K, et al. Meta-analysis for impact of statin on mortality after  
45  
46 transcatheter aortic valve implantation. *Am J Cardiol* 2019;124:920–25.  
47  
48  
49 18 Shepherd J, Blauw GJ, Murphy MB, et al. Pravastatin in elderly individuals at risk of  
50  
51 vascular disease (PROSPER): a randomised controlled trial. *Lancet* 2002;360:1623–30.  
52  
53  
54 19 Mortensen MB, Falk E. Primary prevention with statins in the elderly. *J Am Coll Cardiol*  
55  
56 2018;71:85–94.  
57  
58  
59 20 Piepoli MF, Hoes AW, Agewall S, et al. 2016 European Guidelines on cardiovascular  
60 disease prevention in clinical practice: The Sixth Joint Task Force of the European Society of

1  
2  
3 Cardiology and other societies on cardiovascular disease prevention in clinical practice  
4  
5 (constituted by representatives of 10 societies and by invited experts) developed with the  
6  
7 special contribution of the European Association for Cardiovascular Prevention &  
8  
9 Rehabilitation (EACPR). *Eur Heart J* 2016;37:2315–81.

11  
12 21 Bibbins-Domingo K, Grossman DC, Curry SJ, et al. Statin use for the primary prevention  
13  
14 of cardiovascular disease in adults: US Preventive Services Task Force recommendation  
15  
16 statement. *JAMA* 2016;316:1997–2007.

17  
18 22 Anderson TJ, Gregoire J, Pearson GJ, et al. 2016 Canadian Cardiovascular Society  
19  
20 guidelines for the management of dyslipidemia for the prevention of cardiovascular disease in  
21  
22 the adult. *Can J Cardiol* 2016;32:1263–82.

23  
24 23 National Clinical Guideline Centre. Lipid Modification: Cardiovascular risk assessment  
25  
26 and the modification of blood lipids for the primary and secondary prevention of  
27  
28 cardiovascular disease. London, UK: National Institute for Health and Care Excellence 2014.

29  
30 24 Nanna MG, Navar AM, Wang TY, et al. Statin use and adverse effects among adults >75  
31  
32 years of age: insights from the Patient and Provider Assessment of Lipid Management  
33  
34 (PALM) registry. *J Am Heart Assoc* 2018;7:e008546.

35  
36 25 Cholesterol Treatment Trialists' Collaboration. Efficacy and safety of statin therapy in  
37  
38 older people: a meta-analysis of individual participant data from 28 randomised controlled  
39  
40 trials. *Lancet* 2019;393:407–15.

41  
42 26 Ramos R, Comas-Cufi M, Marti-Lluch R, et al. Statins for primary prevention of  
43  
44 cardiovascular events and mortality in old and very old adults with and without type 2  
45  
46 diabetes: retrospective cohort study. *BMJ* 2018;362:k3359.

47  
48 27 Giral P, Neumann A, Weill A, et al. Cardiovascular effect of discontinuing statins for  
49  
50 primary prevention at the age of 75 years: a nationwide population-based cohort study in  
51  
52 France. *Eur Heart J* 2019;40:3516–25.

1  
2  
3 28 Scandinavian Simvastatin Survival Study Group. Randomised trial of cholesterol lowering  
4 in 4444 patients with coronary heart disease: the Scandinavian Simvastatin Survival Study  
5  
6  
7 (4S). *Lancet* 1994;344:1383–89.  
8  
9  
10  
11  
12  
13  
14  
15  
16  
17  
18  
19  
20  
21  
22  
23  
24  
25  
26  
27  
28  
29  
30  
31  
32  
33  
34  
35  
36  
37  
38  
39  
40  
41  
42  
43  
44  
45  
46  
47  
48  
49  
50  
51  
52  
53  
54  
55  
56  
57  
58  
59  
60

For peer review only

## Figure legends

### Figure 1

Flowchart of patient selection for the present study.

OCEAN; Optimized CathEter vAlvular iNtervention; TAVI, transcatheter aortic valve implantation.

### Figure 2

Kaplan-Meier curves for mid-term and 30-day mortality in the matched cohort. *a, b, c*:

Kaplan-Meier curves for mid-term all-cause mortality (*a*), CV mortality (*b*), and non-CV

mortality (*c*) in the matched cohort. *d*: Kaplan-Meier curve for 30-day all-cause mortality and

mid-term all-cause mortality with the landmark analysis from 30 days in the matched cohort.

CI, confidence interval; CV, cardiovascular; HR, hazard ratio.

### Figure 3

Kaplan-Meier curves for all-cause mortality in the octogenarian and nonagenarian cohort.

### Figure 4

Kaplan-Meier curve for all-cause mortality according to previous coronary artery disease and statin therapy in the overall cohort.

CAD, coronary artery disease.

**Table 1**

Patient characteristics before and after propensity score matching

|                                   | Before matching              |                              |                            | After matching              |                             |                            |
|-----------------------------------|------------------------------|------------------------------|----------------------------|-----------------------------|-----------------------------|----------------------------|
|                                   | Statin (+)<br><i>n</i> =1065 | Statin (-)<br><i>n</i> =1523 | Standardised<br>difference | Statin (+)<br><i>n</i> =936 | Statin (-)<br><i>n</i> =936 | Standardised<br>difference |
| Preprocedural variables           |                              |                              |                            |                             |                             |                            |
| Age, years                        | 84.1±5.0                     | 84.6±5.3                     | 0.01                       | 84.2±5.0                    | 84.3±5.2                    | 0.01                       |
| Men, <i>n</i> (%)                 | 322 (30.2%)                  | 473 (31.1%)                  | 0.02                       | 277 (29.6%)                 | 255 (27.2%)                 | 0.05                       |
| Body surface area, m <sup>2</sup> | 1.44±0.17                    | 1.42±0.17                    | 0.13                       | 1.44±0.17                   | 1.43±0.17                   | 0.07                       |

|    |                                              |             |              |      |             |             |       |
|----|----------------------------------------------|-------------|--------------|------|-------------|-------------|-------|
| 1  |                                              |             |              |      |             |             |       |
| 2  |                                              |             |              |      |             |             |       |
| 3  |                                              |             |              |      |             |             |       |
| 4  | NYHA class 3 or 4, <i>n</i> (%)              | 518 (48.6%) | 803 (52.7%)  | 0.08 | 462 (49.4%) | 457 (48.8%) | 0.01  |
| 5  |                                              |             |              |      |             |             |       |
| 6  |                                              |             |              |      |             |             |       |
| 7  |                                              |             |              |      |             |             |       |
| 8  | Clinical Frailty Scale                       | 3.8±1.2     | 4.1±1.3      | 0.23 | 3.8±1.2     | 3.8±1.2     | 0.04  |
| 9  |                                              |             |              |      |             |             |       |
| 10 |                                              |             |              |      |             |             |       |
| 11 | Diabetes mellitus, <i>n</i> (%)              | 264 (24.8%) | 291 (19.1%)  | 0.14 | 207 (22.1%) | 195 (20.8%) | 0.03  |
| 12 |                                              |             |              |      |             |             |       |
| 13 |                                              |             |              |      |             |             |       |
| 14 |                                              |             |              |      |             |             |       |
| 15 | Smoking, <i>n</i> (%)                        | 212 (19.9%) | 260 (17.1%)  | 0.07 | 169 (18.1%) | 160 (17.1%) | 0.02  |
| 16 |                                              |             |              |      |             |             |       |
| 17 |                                              |             |              |      |             |             |       |
| 18 |                                              |             |              |      |             |             |       |
| 19 | Hypertension, <i>n</i> (%)                   | 861 (80.9%) | 1129 (74.1%) | 0.16 | 744 (79.5%) | 753 (80.5%) | 0.02  |
| 20 |                                              |             |              |      |             |             |       |
| 21 |                                              |             |              |      |             |             |       |
| 22 | Chronic kidney disease, <i>n</i> (%)         | 755 (70.9%) | 1054 (69.2%) | 0.04 | 651 (69.6%) | 640 (68.4%) | 0.03  |
| 23 |                                              |             |              |      |             |             |       |
| 24 |                                              |             |              |      |             |             |       |
| 25 |                                              |             |              |      |             |             |       |
| 26 | Atrial fibrillation, <i>n</i> (%)            | 195 (18.3%) | 354 (23.2%)  | 0.12 | 181 (19.3%) | 183 (19.6%) | 0.01  |
| 27 |                                              |             |              |      |             |             |       |
| 28 |                                              |             |              |      |             |             |       |
| 29 |                                              |             |              |      |             |             |       |
| 30 | Coronary artery disease, <i>n</i> (%)        | 507 (47.6%) | 447 (29.4%)  | 0.38 | 378 (40.4%) | 372 (39.7%) | 0.01  |
| 31 |                                              |             |              |      |             |             |       |
| 32 |                                              |             |              |      |             |             |       |
| 33 | Previous myocardial infarction, <i>n</i> (%) | 108 (10.1%) | 50 (3.3%)    | 0.28 | 48 (5.1%)   | 48 (5.1%)   | <0.01 |
| 34 |                                              |             |              |      |             |             |       |
| 35 |                                              |             |              |      |             |             |       |
| 36 |                                              |             |              |      |             |             |       |
| 37 |                                              |             |              |      |             |             |       |
| 38 |                                              |             |              |      |             |             |       |
| 39 |                                              |             |              |      |             |             |       |
| 40 |                                              |             |              |      |             |             |       |
| 41 |                                              |             |              |      |             |             |       |
| 42 |                                              |             |              |      |             |             |       |
| 43 |                                              |             |              |      |             |             |       |
| 44 |                                              |             |              |      |             |             |       |
| 45 |                                              |             |              |      |             |             |       |
| 46 |                                              |             |              |      |             |             |       |



|    |                                                        |             |             |      |             |             |       |
|----|--------------------------------------------------------|-------------|-------------|------|-------------|-------------|-------|
| 1  |                                                        |             |             |      |             |             |       |
| 2  |                                                        |             |             |      |             |             |       |
| 3  |                                                        |             |             |      |             |             |       |
| 4  | Previous percutaneous coronary intervention, <i>n</i>  |             |             |      |             |             |       |
| 5  |                                                        |             |             |      |             |             |       |
| 6  |                                                        |             |             |      |             |             |       |
| 7  |                                                        |             |             |      |             |             |       |
| 8  | (%)                                                    | 342 (32.1%) | 284 (18.7%) | 0.31 | 249 (26.6%) | 238 (25.4%) | 0.03  |
| 9  |                                                        |             |             |      |             |             |       |
| 10 |                                                        |             |             |      |             |             |       |
| 11 | Previous coronary artery bypass grafting, <i>n</i> (%) | 112 (10.5%) | 57 (3.7%)   | 0.27 | 60 (6.4%)   | 57 (6.1%)   | 0.01  |
| 12 |                                                        |             |             |      |             |             |       |
| 13 |                                                        |             |             |      |             |             |       |
| 14 |                                                        |             |             |      |             |             |       |
| 15 | Peripheral artery disease, <i>n</i> (%)                | 161 (15.1%) | 216 (14.2%) | 0.03 | 136 (14.5%) | 128 (13.7%) | 0.02  |
| 16 |                                                        |             |             |      |             |             |       |
| 17 |                                                        |             |             |      |             |             |       |
| 18 |                                                        |             |             |      |             |             |       |
| 19 | Previous stroke, <i>n</i> (%)                          | 127 (11.9%) | 174 (11.4%) | 0.02 | 116 (12.4%) | 102 (10.9%) | 0.05  |
| 20 |                                                        |             |             |      |             |             |       |
| 21 |                                                        |             |             |      |             |             |       |
| 22 | STS risk score                                         | 7.7±6.0     | 8.6±7.5     | 0.13 | 7.7±6.1     | 7.7±5.3     | <0.01 |
| 23 |                                                        |             |             |      |             |             |       |
| 24 |                                                        |             |             |      |             |             |       |
| 25 |                                                        |             |             |      |             |             |       |
| 26 | Renin-angiotensin inhibitor, <i>n</i> (%)              | 639 (60.0%) | 748 (49.1%) | 0.22 | 540 (57.7%) | 544 (58.1%) | 0.01  |
| 27 |                                                        |             |             |      |             |             |       |
| 28 |                                                        |             |             |      |             |             |       |
| 29 |                                                        |             |             |      |             |             |       |
| 30 | β blocker, <i>n</i> (%)                                | 384 (36.1%) | 496 (32.6%) | 0.07 | 334 (35.7%) | 303 (32.4%) | 0.07  |
| 31 |                                                        |             |             |      |             |             |       |
| 32 |                                                        |             |             |      |             |             |       |
| 33 | eGFR, mL/min/1.73 m <sup>2</sup>                       | 51.7±18.5   | 51.1±20.1   | 0.03 | 52.3±18.6   | 51.7±19.6   | 0.03  |
| 34 |                                                        |             |             |      |             |             |       |
| 35 |                                                        |             |             |      |             |             |       |
| 36 |                                                        |             |             |      |             |             |       |
| 37 | Haemoglobin, g/dL                                      | 11.4±1.7    | 11.1±1.7    | 0.17 | 11.4±1.7    | 11.2±1.6    | 0.15  |
| 38 |                                                        |             |             |      |             |             |       |
| 39 |                                                        |             |             |      |             |             |       |
| 40 |                                                        |             |             |      |             |             |       |
| 41 |                                                        |             |             |      |             |             |       |
| 42 |                                                        |             |             |      |             |             |       |
| 43 |                                                        |             |             |      |             |             |       |
| 44 |                                                        |             |             |      |             |             |       |
| 45 |                                                        |             |             |      |             |             |       |
| 46 |                                                        |             |             |      |             |             |       |

| Preprocedural echocardiographic data                       |           |           |       |           |           |       |
|------------------------------------------------------------|-----------|-----------|-------|-----------|-----------|-------|
| Aortic valve area, cm <sup>2</sup>                         | 0.64±0.17 | 0.63±0.17 | 0.04  | 0.63±0.17 | 0.63±0.16 | <0.01 |
| Indexed aortic valve area, cm <sup>2</sup> /m <sup>2</sup> | 0.44±0.12 | 0.44±0.12 | <0.01 | 0.44±0.12 | 0.45±0.12 | 0.03  |
| Mean aortic gradient, mmHg                                 | 50.0±18.1 | 51.0±18.4 | 0.05  | 51.0±18.2 | 50.8±18.2 | 0.01  |
| Peak velocity, m/sec                                       | 4.5±0.8   | 4.6±0.8   | 0.07  | 4.6±0.8   | 4.6±0.8   | 0.02  |
| Ejection fraction, %                                       | 59.2±12.7 | 59.2±12.6 | <0.01 | 59.6±12.4 | 59.7±12.0 | 0.01  |
| Severe aortic regurgitation, <i>n</i> (%)                  | 12 (0.8%) | 4 (0.4%)  | 0.05  | 7 (0.8%)  | 4 (0.4%)  | 0.04  |
| Severe mitral regurgitation, <i>n</i> (%)                  | 21 (1.4%) | 12 (1.1%) | 0.02  | 12 (1.3%) | 6 (0.6%)  | 0.07  |
| Pulmonary hypertension, <i>n</i> (%)                       | 40 (3.8%) | 62 (4.1%) | 0.02  | 37 (4.0%) | 33 (3.5%) | 0.02  |
| Preprocedural CT data                                      |           |           |       |           |           |       |

1  
2  
3  
4  
5  
6  
7  
8  
9  
10  
11  
12  
13  
14  
15  
16  
17  
18  
19  
20  
21  
22  
23  
24  
25  
26  
27  
28  
29  
30  
31  
32  
33  
34  
35  
36  
37  
38  
39  
40  
41  
42  
43  
44  
45  
46

|                                     |             |              |      |             |             |      |
|-------------------------------------|-------------|--------------|------|-------------|-------------|------|
| Annular area, mm <sup>2</sup>       | 395.5±70.7  | 400.7±71.0   | 0.07 | 395.9±70.2  | 396.5±69.1  | 0.01 |
| Procedural variables                |             |              |      |             |             |      |
| Transfemoral approach, <i>n</i> (%) | 873 (82.0%) | 1294 (85.0%) | 0.08 | 770 (82.3%) | 784 (83.8%) | 0.04 |
| Local anaesthesia, <i>n</i> (%)     | 799 (75.0%) | 1179 (77.4%) | 0.06 | 714 (76.3%) | 734 (78.4%) | 0.05 |
| Contrast volume, mL                 | 115.8±59.1  | 115.4±58     | 0.01 | 118.8±60.0  | 113.5±57.1  | 0.09 |
| Fluoroscopy time, min               | 21.7±12.5   | 21.1±10.0    | 0.05 | 21.9±12.6   | 21.0±10.0   | 0.08 |
| Procedure time, min                 | 81.6±45.8   | 80.3±45.4    | 0.03 | 81.6±43.0   | 80.4±43.6   | 0.03 |

CT, computed tomography; eGFR, estimated glomerular filtration rate; NYHA, New York Heart Association; STS, Society of Thoracic Surgeons.

**Table 2**

In-hospital outcomes before and after propensity score matching

|                                     | Before matching |                |                |            | After matching |               |                |            |
|-------------------------------------|-----------------|----------------|----------------|------------|----------------|---------------|----------------|------------|
|                                     |                 |                | Standardised   |            |                |               | Standardised   |            |
|                                     | Statin (+)      | Statin (-)     | <i>P</i> value | difference | Statin (+)     | Statin (-)    | <i>P</i> value | difference |
|                                     | <i>n</i> =1065  | <i>n</i> =1523 |                |            | <i>n</i> =936  | <i>n</i> =936 |                |            |
| All-cause mortality, <i>n</i> (%)   | 27 (2.5%)       | 43 (2.8%)      | 0.66           | 0.02       | 20 (2.1%)      | 23 (2.5%)     | 0.64           | 0.02       |
| Acute kidney injury, <i>n</i> (%)   | 111 (10.4%)     | 178 (11.7%)    | 0.31           | 0.04       | 96 (10.3%)     | 105 (11.2%)   | 0.50           | 0.03       |
| Stroke, <i>n</i> (%)                | 27 (2.5%)       | 34 (2.2%)      | 0.62           | 0.02       | 24 (2.6%)      | 19 (2.0%)     | 0.44           | 0.04       |
| Vascular complication, <i>n</i> (%) | 105 (9.9%)      | 128 (8.4%)     | 0.21           | 0.05       | 90 (9.6%)      | 78 (8.3%)     | 0.33           | 0.05       |

| Postprocedural echocardiographic data                           |           |            |      |      |           |           |      |       |  |
|-----------------------------------------------------------------|-----------|------------|------|------|-----------|-----------|------|-------|--|
| Effective orifice area, cm <sup>2</sup>                         | 1.67±0.45 | 1.69±0.45  | 0.53 | 0.03 | 1.68±0.44 | 1.66±0.43 | 0.34 | 0.04  |  |
| Indexed effective orifice area, cm <sup>2</sup> /m <sup>2</sup> | 1.17±0.32 | 1.20±0.31  | 0.02 | 0.10 | 1.18±0.32 | 1.18±0.30 | 0.99 | <0.01 |  |
| Mean aortic gradient, mmHg                                      | 11.0±4.4  | 10.6±4.7   | 0.08 | 0.07 | 11.0±4.4  | 11.0±4.9  | 0.92 | <0.01 |  |
| Peak velocity, m/sec                                            | 2.3±0.4   | 2.2±0.5    | 0.10 | 0.07 | 2.3±0.5   | 2.3±0.5   | 0.98 | <0.01 |  |
| Moderate or severe aortic regurgitation, <i>n</i> (%)           | 18 (1.7%) | 31 (2.1%)  | 0.51 | 0.03 | 17 (1.8%) | 20 (2.2%) | 0.61 | 0.02  |  |
| Moderate or severe mitral regurgitation, <i>n</i> (%)           | 59 (5.6%) | 100 (6.6%) | 0.27 | 0.04 | 45 (4.8%) | 51 (5.5%) | 0.52 | 0.03  |  |

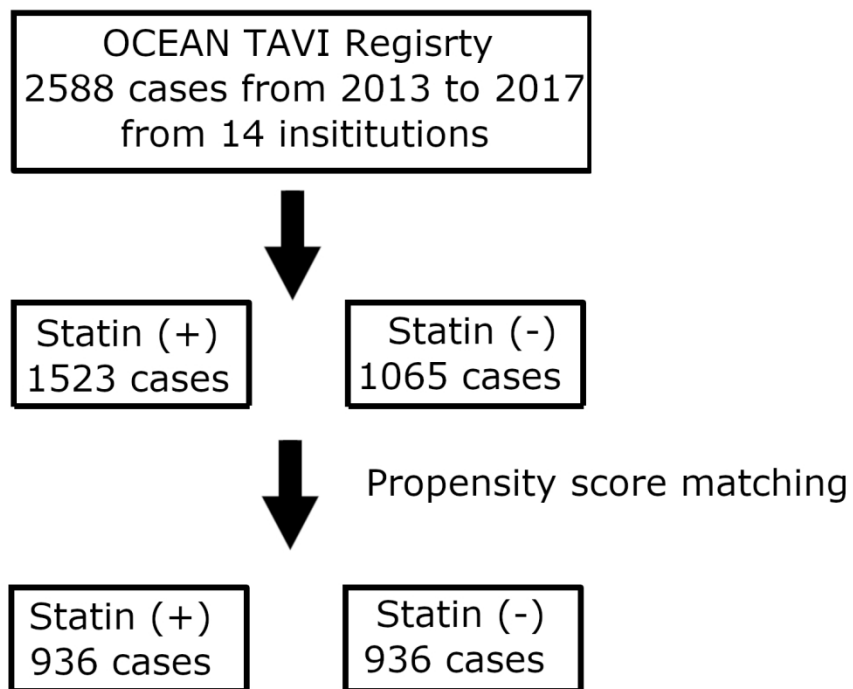

Flowchart of patient selection for the present study.

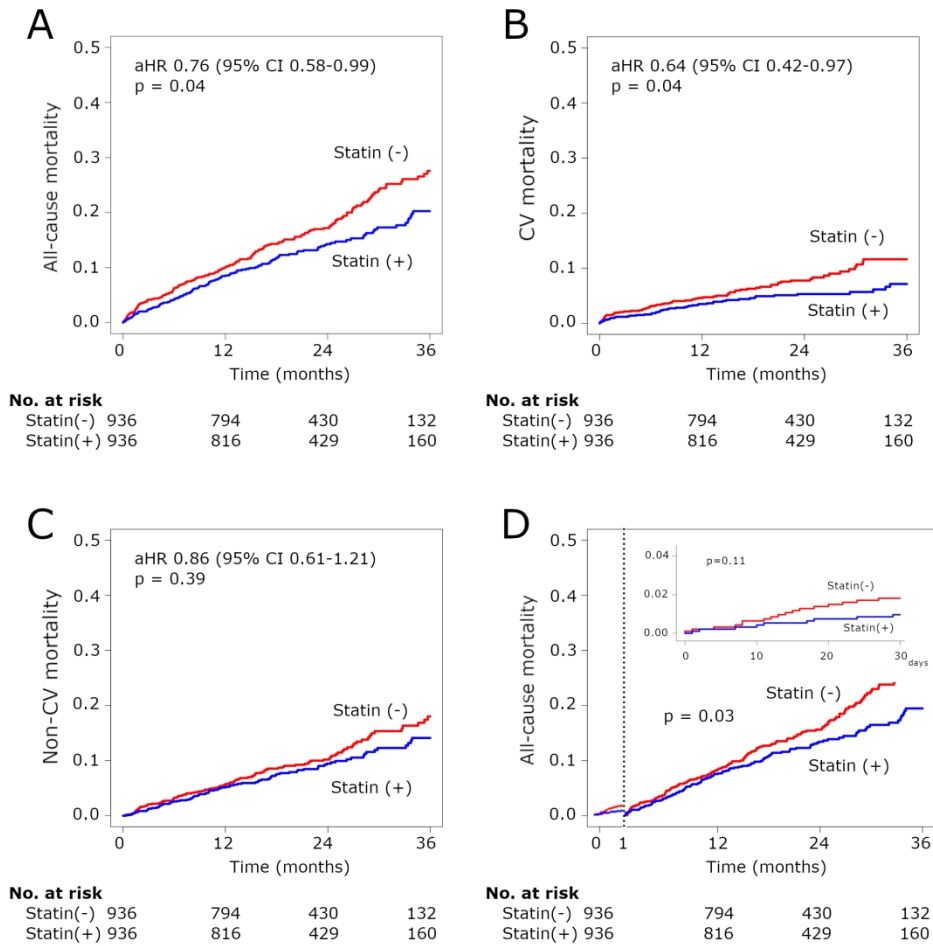

Kaplan-Meier curves for mid-term and 30-day mortality in the matched cohort.

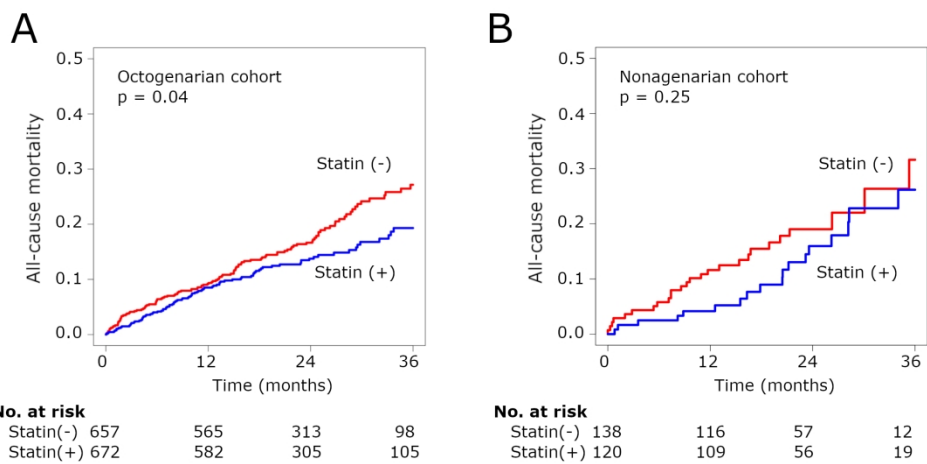

Kaplan-Meier curves for all-cause mortality in the octogenarian and nonagenarian cohort.



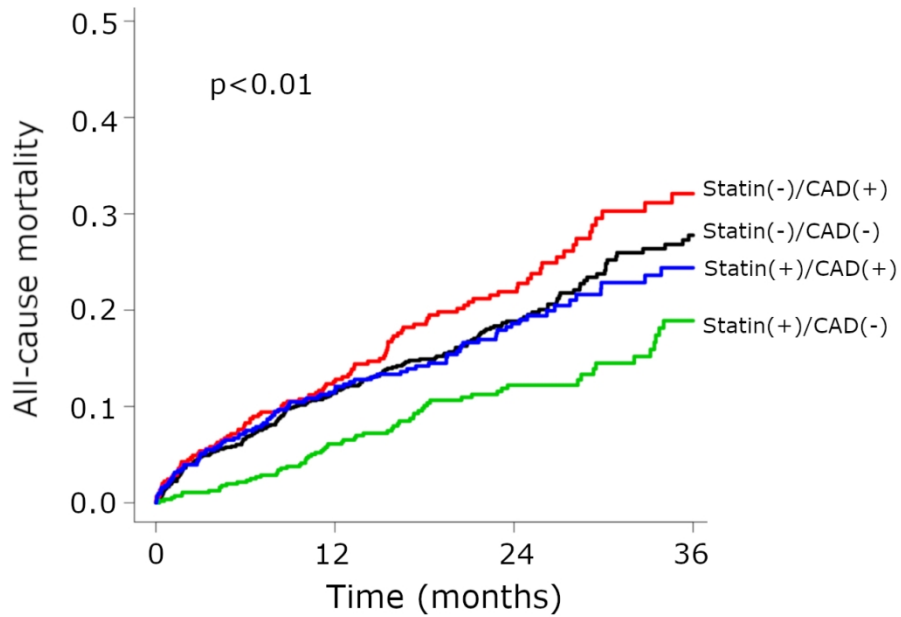**No. at risk**

|                  |      |     |     |     |
|------------------|------|-----|-----|-----|
| Statin(-)/CAD(+) | 447  | 368 | 201 | 59  |
| Statin(-)/CAD(-) | 1076 | 895 | 456 | 142 |
| Statin(+)/CAD(+) | 507  | 428 | 231 | 87  |
| Statin(+)/CAD(-) | 558  | 497 | 256 | 93  |

Kaplan-Meier curve for all-cause mortality according to previous coronary artery disease and statin therapy in the overall cohort.

**Supplementary material online**

**Supplementary Figure S1**

Distribution of propensity scores between statin and non-statin groups in the overall cohort.

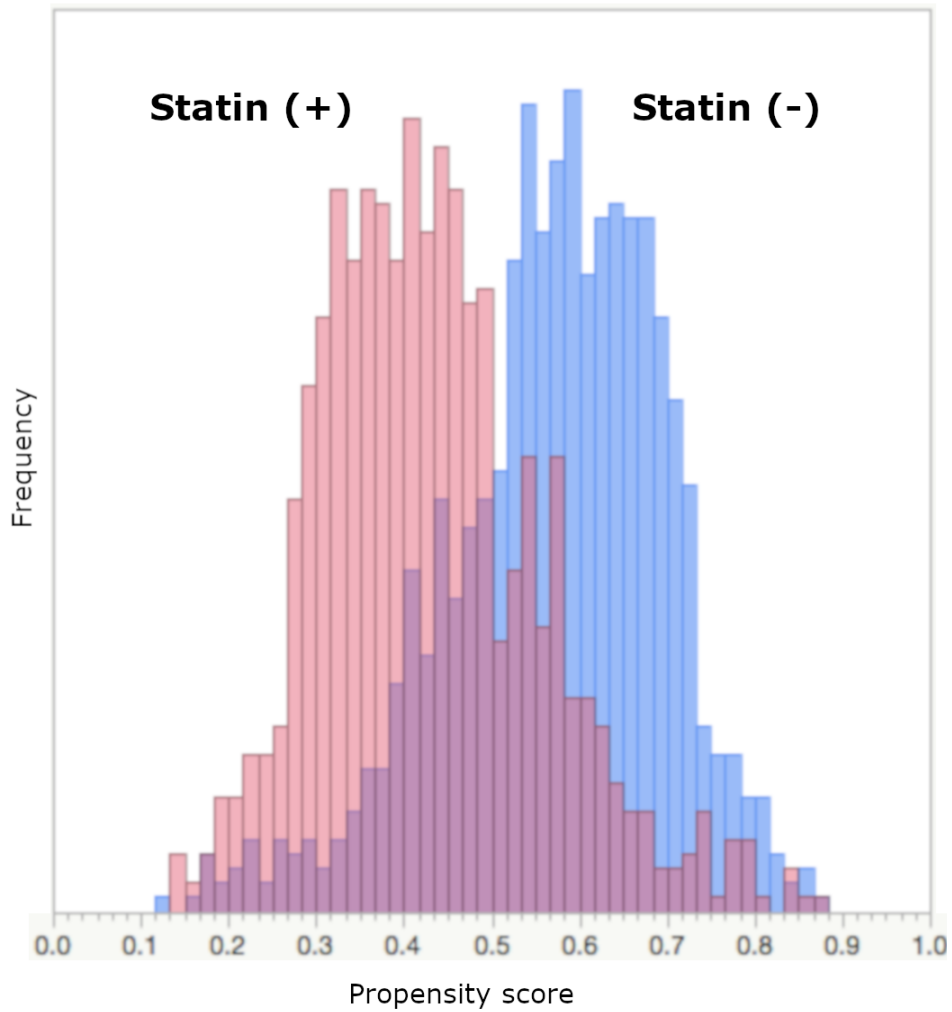

## Supplementary Table S1

Patient characteristics of the propensity score matched and unmatched groups

|                                      | Unmatched                       |                        | <i>P</i> -value |
|--------------------------------------|---------------------------------|------------------------|-----------------|
|                                      | Matched group<br><i>n</i> =1872 | group<br><i>n</i> =716 |                 |
| Preprocedural variables              |                                 |                        |                 |
| Age, years                           | 84.2±5.1                        | 84.6±5.4               | 0.08            |
| Male, <i>n</i> (%)                   | 532 (28.4%)                     | 263 (36.7%)            | <0.01           |
| Body surface area, m <sup>2</sup>    | 1.43±0.17                       | 1.42±0.17              | 0.16            |
| NYHA class 3 or 4, <i>n</i> (%)      | 919 (49.1%)                     | 402 (56.2%)            | <0.01           |
| Clinical Frailty Scale               | 3.8±1.2                         | 4.2±1.4                | <0.01           |
| Smoking, <i>n</i> (%)                | 364 (19.4%)                     | 160 (22.4%)            | 0.10            |
| Diabetes mellitus, <i>n</i> (%)      | 402 (21.5%)                     | 153 (21.4%)            | 0.95            |
| Hypertension, <i>n</i> (%)           | 1497 (80.0%)                    | 493 (68.9%)            | <0.01           |
| Chronic kidney disease, <i>n</i> (%) | 1291 (69.0%)                    | 518 (72.4%)            | 0.09            |
| Atrial fibrillation, <i>n</i> (%)    | 364 (19.4%)                     | 185 (25.8%)            | <0.01           |

|                                                              |              |             |       |
|--------------------------------------------------------------|--------------|-------------|-------|
| Coronary artery disease, <i>n</i> (%)                        | 750 (40.1%)  | 204 (28.5%) | <0.01 |
| Previous myocardial infarction, <i>n</i> (%)                 | 96 (5.1%)    | 62 (8.7%)   | <0.01 |
| Previous percutaneous coronary intervention,<br><i>n</i> (%) | 487 (26.0%)  | 139 (19.4%) | <0.01 |
| Previous coronary artery bypass grafting, <i>n</i><br>(%)    | 117 (6.3%)   | 52 (7.3%)   | 0.36  |
| Peripheral artery disease, <i>n</i> (%)                      | 264 (14.1%)  | 113 (15.8%) | 0.28  |
| Previous stroke, <i>n</i> (%)                                | 9 (0.5%)     | 3 (0.4%)    | 0.98  |
| STS risk score                                               | 7.7±5.7      | 9.8±9.2     | <0.01 |
| Renin-angiotensin inhibitor, <i>n</i> (%)                    | 1084 (57.9%) | 303 (42.3%) | <0.01 |
| Beta blocker, <i>n</i> (%)                                   | 637 (34.0%)  | 243 (33.9%) | 0.97  |
| eGFR, mL/min/1.73 m <sup>2</sup>                             | 52.0±19.1    | 49.7±20.1   | <0.01 |
| Haemoglobin, g/dL                                            | 11.3±1.6     | 11.2±1.7    | 0.16  |
| Procedural variables                                         |              |             |       |
| Transfemoral approach, <i>n</i> (%)                          | 1554 (83.0%) | 613 (85.6%) | 0.11  |

|                                 |              |             |      |
|---------------------------------|--------------|-------------|------|
| Local anaesthesia, <i>n</i> (%) | 1448 (77.4%) | 530 (74.0%) | 0.08 |
| Contrast volume, mL             | 116.1±58.6   | 114.1±58.2  | 0.43 |
| Fluoroscopy time, min           | 21.4±11.4    | 21.2±10.5   | 0.66 |
| Procedure time, min             | 81.0±43.3    | 80.3±50.9   | 0.72 |

CT, computed tomography; eGFR, estimated glomerular filtration rate; NYHA, New York Heart Association; STS, Society of Thoracic Surgeons.

1  
2  
3 **Supplementary Table S2**  
4

5 In-hospital outcomes of the propensity score-matched and -unmatched groups  
6  
7

|                                     | <b>Matched group</b> | <b>Unmatched group</b> | <b><i>P</i>-value</b> |
|-------------------------------------|----------------------|------------------------|-----------------------|
|                                     | <b><i>n</i>=1872</b> | <b><i>n</i>=716</b>    |                       |
| All-cause mortality, <i>n</i> (%)   | 43 (2.3%)            | 27 (3.8%)              | <0.01                 |
| Acute kidney injury, <i>n</i> (%)   | 201 (10.7%)          | 88 (12.3%)             | 0.27                  |
| Bleeding, <i>n</i> (%)              | 421 (22.5%)          | 199 (27.8%)            | <0.01                 |
| Stroke, <i>n</i> (%)                | 43 (2.3%)            | 18 (2.5%)              | 0.75                  |
| Vascular complication, <i>n</i> (%) | 168 (9.0%)           | 65 (9.1%)              | 0.93                  |

**STROBE 2007 (v4) Statement—Checklist of items that should be included in reports of *cohort studies***

| Section/Topic                | Item # | Recommendation                                                                                                                                                                       | Reported on page # |
|------------------------------|--------|--------------------------------------------------------------------------------------------------------------------------------------------------------------------------------------|--------------------|
| <b>Title and abstract</b>    | 1      | (a) Indicate the study's design with a commonly used term in the title or the abstract                                                                                               | 3                  |
|                              |        | (b) Provide in the abstract an informative and balanced summary of what was done and what was found                                                                                  | 3                  |
| <b>Introduction</b>          |        |                                                                                                                                                                                      |                    |
| Background/rationale         | 2      | Explain the scientific background and rationale for the investigation being reported                                                                                                 | 5                  |
| Objectives                   | 3      | State specific objectives, including any prespecified hypotheses                                                                                                                     | 5                  |
| <b>Methods</b>               |        |                                                                                                                                                                                      |                    |
| Study design                 | 4      | Present key elements of study design early in the paper                                                                                                                              | 4-6                |
| Setting                      | 5      | Describe the setting, locations, and relevant dates, including periods of recruitment, exposure, follow-up, and data collection                                                      | 4-6                |
| Participants                 | 6      | (a) Give the eligibility criteria, and the sources and methods of selection of participants. Describe methods of follow-up                                                           | 4-6                |
|                              |        | (b) For matched studies, give matching criteria and number of exposed and unexposed                                                                                                  | 6                  |
| Variables                    | 7      | Clearly define all outcomes, exposures, predictors, potential confounders, and effect modifiers. Give diagnostic criteria, if applicable                                             | 5-6                |
| Data sources/<br>measurement | 8*     | For each variable of interest, give sources of data and details of methods of assessment (measurement). Describe comparability of assessment methods if there is more than one group | 5-6                |
| Bias                         | 9      | Describe any efforts to address potential sources of bias                                                                                                                            | 6                  |
| Study size                   | 10     | Explain how the study size was arrived at                                                                                                                                            | 4-5                |
| Quantitative variables       | 11     | Explain how quantitative variables were handled in the analyses. If applicable, describe which groupings were chosen and why                                                         | 5-6                |
| Statistical methods          | 12     | (a) Describe all statistical methods, including those used to control for confounding                                                                                                | 6                  |
|                              |        | (b) Describe any methods used to examine subgroups and interactions                                                                                                                  | 6                  |
|                              |        | (c) Explain how missing data were addressed                                                                                                                                          | NA                 |
|                              |        | (d) If applicable, explain how loss to follow-up was addressed                                                                                                                       | NA                 |
|                              |        | (e) Describe any sensitivity analyses                                                                                                                                                | NA                 |
| <b>Results</b>               |        |                                                                                                                                                                                      |                    |

|                          |     |                                                                                                                                                                                                              |           |
|--------------------------|-----|--------------------------------------------------------------------------------------------------------------------------------------------------------------------------------------------------------------|-----------|
| Participants             | 13* | (a) Report numbers of individuals at each stage of study—eg numbers potentially eligible, examined for eligibility, confirmed eligible, included in the study, completing follow-up, and analysed            | Figure2-4 |
|                          |     | (b) Give reasons for non-participation at each stage                                                                                                                                                         | NA        |
|                          |     | (c) Consider use of a flow diagram                                                                                                                                                                           | Figure1   |
| Descriptive data         | 14* | (a) Give characteristics of study participants (eg demographic, clinical, social) and information on exposures and potential confounders                                                                     | 12        |
|                          |     | (b) Indicate number of participants with missing data for each variable of interest                                                                                                                          | NA        |
|                          |     | (c) Summarise follow-up time (eg, average and total amount)                                                                                                                                                  | 9         |
| Outcome data             | 15* | Report numbers of outcome events or summary measures over time                                                                                                                                               | 9         |
| Main results             | 16  | (a) Give unadjusted estimates and, if applicable, confounder-adjusted estimates and their precision (eg, 95% confidence interval). Make clear which confounders were adjusted for and why they were included | 9         |
|                          |     | (b) Report category boundaries when continuous variables were categorized                                                                                                                                    | NA        |
|                          |     | (c) If relevant, consider translating estimates of relative risk into absolute risk for a meaningful time period                                                                                             | NA        |
| Other analyses           | 17  | Report other analyses done—eg analyses of subgroups and interactions, and sensitivity analyses                                                                                                               | 9-10      |
| <b>Discussion</b>        |     |                                                                                                                                                                                                              |           |
| Key results              | 18  | Summarise key results with reference to study objectives                                                                                                                                                     | 10        |
| <b>Limitations</b>       |     |                                                                                                                                                                                                              |           |
| Interpretation           | 20  | Give a cautious overall interpretation of results considering objectives, limitations, multiplicity of analyses, results from similar studies, and other relevant evidence                                   | 12        |
| Generalisability         | 21  | Discuss the generalisability (external validity) of the study results                                                                                                                                        | 12        |
| <b>Other information</b> |     |                                                                                                                                                                                                              |           |
| Funding                  | 22  | Give the source of funding and the role of the funders for the present study and, if applicable, for the original study on which the present article is based                                                | 13        |

\*Give information separately for cases and controls in case-control studies and, if applicable, for exposed and unexposed groups in cohort and cross-sectional studies.

**Note:** An Explanation and Elaboration article discusses each checklist item and gives methodological background and published examples of transparent reporting. The STROBE checklist is best used in conjunction with this article (freely available on the Web sites of PLoS Medicine at <http://www.plosmedicine.org/>, Annals of Internal Medicine at <http://www.annals.org/>, and Epidemiology at <http://www.epidem.com/>). Information on the STROBE Initiative is available at [www.strobe-statement.org](http://www.strobe-statement.org).



# BMJ Open

## Statin therapy for patients with aortic stenosis who underwent transcatheter aortic valve implantation: a report from a Japanese multicentre registry

|                                 |                                                                                                                                                                                                                                                                                                                                                                                                                                                                                                                                                                                                                                                                                                                                                                                                                                                                                                                                                      |
|---------------------------------|------------------------------------------------------------------------------------------------------------------------------------------------------------------------------------------------------------------------------------------------------------------------------------------------------------------------------------------------------------------------------------------------------------------------------------------------------------------------------------------------------------------------------------------------------------------------------------------------------------------------------------------------------------------------------------------------------------------------------------------------------------------------------------------------------------------------------------------------------------------------------------------------------------------------------------------------------|
| Journal:                        | <i>BMJ Open</i>                                                                                                                                                                                                                                                                                                                                                                                                                                                                                                                                                                                                                                                                                                                                                                                                                                                                                                                                      |
| Manuscript ID                   | bmjopen-2020-044319.R1                                                                                                                                                                                                                                                                                                                                                                                                                                                                                                                                                                                                                                                                                                                                                                                                                                                                                                                               |
| Article Type:                   | Original research                                                                                                                                                                                                                                                                                                                                                                                                                                                                                                                                                                                                                                                                                                                                                                                                                                                                                                                                    |
| Date Submitted by the Author:   | 17-Mar-2021                                                                                                                                                                                                                                                                                                                                                                                                                                                                                                                                                                                                                                                                                                                                                                                                                                                                                                                                          |
| Complete List of Authors:       | Yashima, Fumiaki; Saiseikai Utsunomiya Hospital; Keio University Hospital<br>Hara, Masahiko; Shimane University<br>Inohara, Taku; Vancouver General Hospital<br>Jinzaki, Masahiro ; Keio University Hospital<br>Shimizu, Hideyuki; Keio University Hospital<br>Fukuda, Keiichi; Keio University Hospital<br>Tanaka, Makoto; Keio University Hospital<br>Yamamoto, Masanori; Toyohashi Heart Center<br>Watanabe, Yusuke; Teikyo Daigaku<br>Naganuma, Toru; Shintokyo Byoin<br>Shirai, Shinichi; Kokura Kinen Byoin<br>Yamawaki, Masahiro; Saiseikai Yokohamashi Tobu Hospital<br>Tada, Norio; Sendai Kosei Byoin<br>Yamanaka, Futoshi; Shonan Kamakura General Hospital<br>Mizutani, Kazuki; Osaka City General Hospital<br>Ueno, Hiroshi; Toyama Daigaku Igakubu Daigakuin Igaku Yakugaku Kyoikubu,<br>Tabata, Minoru; Tokyo Bay Urayasu Ichikawa Iryo Center<br>Takagi, Kensuke; Ogaki Shimin Byoin<br>Hayashida, Kentaro; Keio University Hospital |
| <b>Primary Subject Heading</b>: | Cardiovascular medicine                                                                                                                                                                                                                                                                                                                                                                                                                                                                                                                                                                                                                                                                                                                                                                                                                                                                                                                              |
| Secondary Subject Heading:      | Medical management                                                                                                                                                                                                                                                                                                                                                                                                                                                                                                                                                                                                                                                                                                                                                                                                                                                                                                                                   |
| Keywords:                       | Cardiology < INTERNAL MEDICINE, Adult cardiology < CARDIOLOGY, Valvular heart disease < CARDIOLOGY, Coronary heart disease < CARDIOLOGY                                                                                                                                                                                                                                                                                                                                                                                                                                                                                                                                                                                                                                                                                                                                                                                                              |
|                                 |                                                                                                                                                                                                                                                                                                                                                                                                                                                                                                                                                                                                                                                                                                                                                                                                                                                                                                                                                      |

SCHOLARONE™  
Manuscripts



I, the Submitting Author has the right to grant and does grant on behalf of all authors of the Work (as defined in the below author licence), an exclusive licence and/or a non-exclusive licence for contributions from authors who are: i) UK Crown employees; ii) where BMJ has agreed a CC-BY licence shall apply, and/or iii) in accordance with the terms applicable for US Federal Government officers or employees acting as part of their official duties; on a worldwide, perpetual, irrevocable, royalty-free basis to BMJ Publishing Group Ltd ("BMJ") its licensees and where the relevant Journal is co-owned by BMJ to the co-owners of the Journal, to publish the Work in this journal and any other BMJ products and to exploit all rights, as set out in our [licence](#).

The Submitting Author accepts and understands that any supply made under these terms is made by BMJ to the Submitting Author unless you are acting as an employee on behalf of your employer or a postgraduate student of an affiliated institution which is paying any applicable article publishing charge ("APC") for Open Access articles. Where the Submitting Author wishes to make the Work available on an Open Access basis (and intends to pay the relevant APC), the terms of reuse of such Open Access shall be governed by a Creative Commons licence – details of these licences and which [Creative Commons](#) licence will apply to this Work are set out in our licence referred to above.

Other than as permitted in any relevant BMJ Author's Self Archiving Policies, I confirm this Work has not been accepted for publication elsewhere, is not being considered for publication elsewhere and does not duplicate material already published. I confirm all authors consent to publication of this Work and authorise the granting of this licence.

1  
2  
3 **Statin therapy for patients with aortic stenosis who underwent transcatheter aortic**  
4 **valve implantation: a report from a Japanese multicentre registry**  
5  
6  
7  
8  
9

10 **Short title:** Statin therapy for TAVI patients  
11  
12  
13

14 Fumiaki Yashima, MD, PhD<sup>1,2,\*</sup>; Masahiko Hara, MD, PhD<sup>3</sup>; Taku Inohara, MD, PhD<sup>2,4</sup>;  
15 Masahiro Jinzaki, MD, PhD<sup>5</sup>; Hideyuki Shimizu, MD, PhD<sup>6</sup>; Keiichi Fukuda, MD, PhD,  
16 FACC, FESC<sup>2</sup>; Makoto Tanaka, MD<sup>2</sup>; Masanori Yamamoto, MD, PhD, FESC<sup>7,8</sup>; Yusuke  
17 Watanabe, MD<sup>9</sup>; Toru Naganuma, MD, FACC, FESC<sup>10</sup>; Shinichi Shirai, MD<sup>11</sup>; Masahiro  
18 Yamawaki, MD<sup>12</sup>; Norio Tada, MD<sup>13</sup>; Futoshi Yamanaka, MD<sup>14</sup>; Kazuki Mizutani, MD<sup>15</sup>;  
19 Hiroshi Ueno, MD<sup>16</sup>; Minoru Tabata, MD<sup>17</sup>; Kensuke Takagi, MD<sup>18</sup>; Kentaro Hayashida,  
20 MD, PhD, FESC, FACC, FJCS<sup>2</sup> on behalf of the OCEAN-TAVI registry  
21  
22  
23  
24  
25  
26  
27  
28  
29  
30  
31  
32

33 <sup>1</sup>Department of Cardiology, Saiseikai Utsunomiya Hospital, Utsunomiya, Japan  
34

35 <sup>2</sup>Department of Cardiology, Keio University School of Medicine, Tokyo, Japan  
36

37 <sup>3</sup>Center for Community-based Healthcare Research and Education, Shimane University,  
38 Izumo, Japan  
39  
40

41 <sup>4</sup>Division of Cardiology, Vancouver General Hospital, Vancouver, Canada  
42

43 <sup>5</sup>Department of Diagnostic Radiology, Keio University School of Medicine, Tokyo, Japan  
44

45 <sup>6</sup>Department of Cardiovascular Surgery, Keio University School of Medicine, Tokyo, Japan  
46

47 <sup>7</sup>Department of Cardiology, Toyohashi Heart Centre, Toyohashi, Japan  
48

49 <sup>8</sup>Department of Cardiology, Nagoya Heart Centre, Aichi, Japan  
50

51 <sup>9</sup>Department of Cardiology, Teikyo University School of Medicine, Tokyo, Japan  
52

53 <sup>10</sup>Department of Cardiology, New Tokyo Hospital, Matsudo, Japan  
54

55 <sup>11</sup>Department of Cardiology, Kokura Memorial Hospital, Kitakyushu, Japan  
56  
57  
58  
59  
60

1  
2  
3 <sup>12</sup>Department of Cardiology, Saiseikai Yokohama-City Eastern Hospital, Yokohama, Japan  
4

5 <sup>13</sup>Department of Cardiology, Sendai Kousei Hospital, Sendai, Japan  
6

7 <sup>14</sup>Department of Cardiology, Shonan Kamakura General Hospital, Kamakura, Japan  
8

9 <sup>15</sup>Department of Cardiology, Osaka City General Hospital, Osaka, Japan  
10

11 <sup>16</sup>Department of Cardiology, Toyama University Hospital, Toyama, Japan  
12

13 <sup>17</sup>Department of Cardiovascular Surgery, Tokyo Bay Urayasu Ichikawa Medical Center,  
14

15 Urayasu, Japan  
16

17 <sup>18</sup>Department of Cardiology, Ogaki Municipal Hospital, Ogaki, Japan  
18

19  
20  
21  
22  
23 **\*Corresponding author**

24 Fumiaki Yashima, MD, PhD  
25

26 Department of Cardiology, Saiseikai Utsunomiya Hospital,  
27

28 911-1 Takebayashi-cho, Utsunomiya, Tochigi, 321-0974, Japan  
29

30 Phone: 81-28-626-5500; Fax: 81-28-626-5573  
31

32 Email: yashima.fumiaki@gmail.com  
33  
34  
35  
36  
37  
38  
39

40 **Word count: 2829**  
41  
42  
43  
44  
45  
46  
47  
48  
49  
50  
51  
52  
53  
54  
55  
56  
57  
58  
59  
60

## Abstract

**Objectives** Data on statin for patients with aortic stenosis (AS) who underwent transcatheter aortic valve implantation (TAVI) are limited. The present study aimed to evaluate the impact of statin on mid-term mortality of TAVI patients.

**Design** Observational study.

**Setting** This study included AS patients who underwent TAVI from a Japanese multicentre registry.

**Participants** The overall cohort included 2588 patients (84.4±5.2 years); the majority were women (69.3%). The Society of Thoracic Surgeons risk score was 6.55% (interquartile range [IQR] 4.55-9.50%), Euro II score was 3.74% (IQR 2.34-6.02%), and Clinical Frailty Scale was 3.9±1.2.

**Interventions** We classified the patients based on statin at admission and identified 936 matched pairs after propensity score matching.

**Primary and secondary outcome measures** The outcomes were all-cause and cardiovascular mortality.

**Results** The median follow-up was 660 days. Statin at admission was associated with a significant reduction in all-cause mortality (adjusted hazard ratio [aHR] 0.76, 95% confidence interval [CI] 0.58–0.99,  $P=0.04$ ) and cardiovascular mortality (aHR 0.64, 95% CI 0.42–0.97,  $P=0.04$ ). In the octogenarians, statin was associated with significantly lower all-cause mortality (aHR 0.87, 95% CI 0.75-0.99,  $P=0.04$ ); however, the impact in the nonagenarians appeared to be lower (aHR 0.84, 95% CI 0.62-1.13,  $P=0.25$ ). Comparing four groups according to previous coronary artery disease (CAD) and statin, there was a significant difference in all-cause mortality and patients who did not receive statin despite previous CAD showed the worst prognosis (aHR 1.33, 95% CI 1.12-1.57 [patients who received statin without previous CAD as a reference],  $P<0.01$ ).

1  
2  
3 **Conclusions** Statin for TAVI patients will be beneficial even in octogenarians, but the  
4  
5 benefits may disappear in nonagenarians. In addition, statin will be essential for TAVI  
6  
7 patients with CAD. Further researches are warranted to confirm and generalise our findings,  
8  
9 since this study has inherent limitations of the observational study and included only Japanese  
10  
11 patients.  
12  
13

14  
15  
16  
17 **Keywords:** coronary artery disease, elderly, propensity score matching, statin, transcatheter  
18  
19 aortic valve implantation  
20  
21  
22  
23  
24

### 25 **Strengths and limitations of this study**

- 26  
27 ● The present study includes the largest number of patients with aortic stenosis who  
28  
29 underwent transcatheter aortic valve implantation (TAVI), assessing the impact of statin  
30  
31 therapy on mid-term all-cause and cardiovascular mortality.  
32  
33
- 34 ● This was the first study to investigate a difference in the statin effect among  
35  
36 octogenarians and nonagenarians, and to evaluate how the impact of statin therapy  
37  
38 differed according to the underlying coronary artery disease.  
39  
40
- 41 ● All-cause and cardiovascular mortality were analysed using propensity score matching  
42  
43 and the Cox proportional hazards regression model.  
44  
45
- 46 ● Unknown and unmeasurable factors may have confounded the relationship between  
47  
48 statin therapy at admission and mortality due to the nature of an observational study.  
49  
50
- 51 ● We could not assess intolerance in patients eligible for statin treatment but who could not  
52  
53 continue treatment due to statin side effects.  
54  
55  
56  
57  
58  
59  
60

## INTRODUCTION

Transcatheter aortic valve implantation (TAVI) is an established treatment for severe aortic stenosis (AS).[1, 2, 3, 4] However, long-term survival after TAVI is not satisfactory, as shown in a meta-analysis including 31 studies; 5-year and 7-year survival rates were 48% and 28%, respectively.[5] TAVI patients are very elderly and have many cardiovascular comorbidities such as coronary artery disease (CAD), stroke, and peripheral artery disease (PAD).[1, 2, 6] Therefore, adjunctive optimal medical therapy is required to improve prognosis after TAVI. Statin therapy is expected to reduce cardiovascular risk and mortality in patients who have undergone TAVI; however, data on statin therapy for TAVI patients are limited. A report from the Placement of Aortic Transcatheter Valve II (PARTNER II) and Sapien 3 clinical trials or associated registries showed that statin therapy was associated with a lower 2-year mortality rate compared to patients not on statin therapy.[7] However, the study did not demonstrate any differences in the statin effect among octogenarians and nonagenarians, and did not evaluate whether the impact of statin therapy would differ according to the underlying CAD. Therefore, the present study aimed to evaluate the impact of statin therapy on mid-term mortality of TAVI patients and its association with age or the underlying CAD, using our Japanese multicentre registry data.

## METHODS

### Study population and design

All patients with severe AS who underwent TAVI at 14 Japanese centres (Keio University Hospital, Teikyo University Hospital, Toyohashi Heart Centre, Nagoya Heart Centre, New Tokyo Hospital, Kokura Memorial Hospital, Saiseikai Yokohama City Eastern Hospital, Sendai Kosei Hospital, Shonan Kamakura General Hospital, Osaka City University Graduate School of Medicine, Kishiwada Tokushukai Hospital, Toyama University Hospital, Tokyo

1  
2  
3 Bay Urayasu Ichikawa Medical Center, and Ogaki municipal hospital) between 2013 and  
4  
5 2017 were prospectively included in our TAVI registry (Optimized Catheter Valvular  
6  
7 Intervention [OCEAN-TAVI] registry).[8, 9, 10] Informed consent was obtained from all  
8  
9 patients, and the institutional review boards of all 14 participating centres approved this study.  
10  
11 Additionally, this study was conducted in accordance with the ethical guidelines of the 1975  
12  
13 Declaration of Helsinki. The OCEAN-TAVI registry was registered with the University  
14  
15 Hospital Medical Information Network Clinical Trial Registry and accepted by the  
16  
17 International Committee of Medical Journal Editors (UMIN-ID: 000020423).  
18  
19  
20

21 Patients received transcatheter heart valves (THVs) via either the transfemoral,  
22  
23 transapical, or transaortic approach. Sapien XT valves, Sapien 3 valves (Edwards  
24  
25 Lifesciences, Irvine, CA), CoreValves, Evolut R (Medtronic, Minneapolis, MN) were used as  
26  
27 THVs. A total of 2588 patients were treated with TAVI between 2013 and 2017. They were  
28  
29 categorised into two groups according to statin administration at admission for TAVI  
30  
31 procedures (Figure 1). We set the primary endpoint as mid-term all-cause mortality for up to 3  
32  
33 years. Secondary endpoints included mid-term cardiovascular mortality, mid-term non-  
34  
35 cardiovascular mortality up to 3 years, and 30-day all-cause mortality.  
36  
37  
38  
39

40 We performed propensity score (PS) matching, as described below, and compared the  
41  
42 endpoints between the two groups in the matched cohort. In addition, we categorised the  
43  
44 matched cohort into two cohorts; an octogenarian cohort (80–89 years old) and a  
45  
46 nonagenarian cohort (90 years or older), and investigated the differences by age in the impact  
47  
48 of statin on mid-term all-cause mortality. Furthermore, we classified the overall cohort into  
49  
50 four groups according to a history of CAD and statin treatment at admission and evaluated  
51  
52 whether the impact of statin differed according to the underlying CAD condition. We also  
53  
54 explored predictors of mid-term all-cause mortality in the overall cohort using multivariate  
55  
56 analysis.  
57  
58  
59  
60



1  
2  
3 Clinical outcomes including all-cause mortality and cardiovascular mortality were  
4 defined according to the Valve Academic Research Consortium-2 consensus document.[11]  
5

### 6 7 **Statistical analysis**

8  
9 Continuous variables are expressed as mean±standard deviation (SD), and categorical  
10 variables are expressed as percentages. Continuous variables were compared using the  
11 Wilcoxon rank-sum test. The chi-squared test was used to compare categorical variables.  
12  
13 Survival curves up to 3 years were presented as Kaplan-Meier curves, and the log-rank test  
14 was used for comparison of the statin and non-statin groups. The Cox proportional hazards  
15 regression analyses were performed to identify independent correlates for mid-term all-cause  
16 mortality.  
17

18  
19 PS matching[12, 13] was used to account for differences in baseline characteristics. The  
20 PS was calculated for each patient using a logistic regression model to predict stratification  
21 into the statin group based on the following variables: age; sex; body surface area; smoking;  
22 diabetes; hypertension; previous history of CAD, myocardial infarction (MI), percutaneous  
23 coronary intervention, coronary artery bypass grafting, stroke, PAD; atrial fibrillation;  
24 estimated glomerular filtration rate; haemoglobin level; renin-angiotensin inhibitor treatment  
25 at admission; New York Heart Association (NYHA) class 3 or 4; Clinical Frailty Scale[8];  
26 and Society of Thoracic Surgeons (STS) risk score. PS matching was performed using 1:1  
27 matching without replacement, with the calliper width equal to 0.2 SD of the PS logit. The  
28 balance between the statin and non-statin groups in the matched cohort was estimated using  
29 absolute standardised difference. The Cox proportional hazards analyses were performed to  
30 assess the impact of statin on the clinical outcomes. In addition to the PS matching model, we  
31 built a multivariable model by inverse probability of treatment weighting (IPTW) using the  
32 PS.[14] All reported *P*-values were two-sided, and a *P*-value <0.05 was considered  
33  
34  
35  
36  
37  
38  
39  
40  
41  
42  
43  
44  
45  
46  
47  
48  
49  
50  
51  
52  
53  
54  
55  
56  
57  
58  
59  
60

1  
2  
3 statistically significant. All statistical analyses were performed using the R software package  
4  
5 (version 3.3.2; R Development Core Team, Vienna, Austria).  
6  
7  
8  
9

### 10 11 **Patient and Public Involvement statement**

12  
13  
14 Patients were first involved in the research when they underwent TAVI and registered to the  
15  
16 OCEAN-TAVI registry through the web-based data collection system. Research questions  
17  
18 and outcome measures were developed by the OCEAN-TAVI registry investigators. Patients  
19  
20 were informed about the registration. They were asked to assess the burden of the intervention  
21  
22 and time required to participate in the research. Information of the registry and the study  
23  
24 results are available on the website of the OCEAN-TAVI registry.  
25  
26  
27  
28  
29  
30

### 31 32 **RESULTS**

33  
34 Among the 2588 patients who underwent TAVI, 1523 and 1065 patients were classified into  
35  
36 the statin and the non-statin group, respectively (Figure 1). The distribution of PS in the statin  
37  
38 and non-statin groups is shown in Supplementary material online, Figure S1. After 1:1 PS  
39  
40 matching, we identified 936 matched pairs of patients with similar PS. The patient  
41  
42 characteristics of the statin and non-statin groups before and after matching are summarised in  
43  
44 Table 1. The overall cohort included very elderly patients (84.4±5.2 years). The majority of  
45  
46 the cohort was female (69.3%). The Society of Thoracic Surgeons risk score was 6.55%  
47  
48 (interquartile range [IQR] 4.55-9.50%), Euro II score was 3.74% (IQR 2.34-6.02%), and  
49  
50 Clinical Frailty Scale was 3.9±1.2.  
51  
52  
53

54  
55 After PS matching, the two groups were well-balanced in terms of pre-procedural patient  
56  
57 characteristics and procedural variables. In-hospital all-cause mortality, acute kidney injury,  
58  
59 stroke, and vascular complications did not differ between the two groups. Post-procedural  
60

1  
2  
3 echocardiography data showed no significant differences between the two groups (Table 2).  
4  
5 The patient characteristics and in-hospital outcomes of the PS matched and unmatched groups  
6  
7 are summarised in Supplementary material online, Tables S1 and S2. There were several  
8  
9 differences between the two groups. The proportion of male patients was lower in the PS  
10  
11 matched group than in the unmatched group (532 [28.4%] vs. 263 [36.7%],  $P<0.01$ ), NYHA  
12  
13 Class 3 or 4 was less frequent in the matched group (919 [49.1%] vs. 402 [56.2%],  $P<0.01$ ),  
14  
15 the Clinical Frailty Scale was lower in the matched group ( $3.8\pm 1.2$  vs.  $4.2\pm 1.4$ ,  $P<0.01$ ), and  
16  
17 the STS risk score was lower in the matched group ( $7.7\pm 5.7$  vs  $9.8\pm 9.2$ ,  $P<0.01$ ). History of  
18  
19 the previous CAD was more frequent (750 [40.1%] vs. 204 [28.5%],  $P<0.01$ ), but previous  
20  
21 MI was less frequent (96 [5.1%] vs. 62 [8.7%],  $P<0.01$ ) in the PS matched group. In-hospital  
22  
23 all-cause mortality (43 [2.3%] vs. 27 [3.8%],  $P<0.01$ ) and bleeding (421 [22.5%] vs. 199  
24  
25 [27.8%],  $P<0.01$ ) were lower in the matched group than in the unmatched group.  
26  
27  
28  
29

30  
31 In the overall cohort, the median follow-up period was 660 days. Statin therapy was  
32  
33 associated with significantly lower mid-term all-cause mortality in the PS-matched cohort  
34  
35 (adjusted hazard ratio [aHR] 0.76, 95% confidence interval [CI] 0.58–0.99,  $P=0.04$ ) (Figure  
36  
37 2a), which was consistent with the IPTW model (aHR 0.80, 95% CI 0.65–0.99,  $P=0.04$ ). The  
38  
39 Kaplan-Meier curves relative to the mid-term outcomes additionally showed significant  
40  
41 differences in cardiovascular mortality (aHR 0.64, 95% CI 0.42–0.97,  $P=0.04$ ) and non-  
42  
43 cardiovascular mortality (aHR 0.86, 95% CI 0.61–1.21,  $P=0.39$ ) between the two groups  
44  
45 (Figure 2b and 2c). There was no significant difference in 30-day all-cause mortality (aHR  
46  
47 0.73, 95% CI 0.47–1.08,  $P=0.11$ ) and a landmark analysis after 30 days showed a significant  
48  
49 difference in mid-term all-cause mortality (aHR 0.88, 95% CI 0.78–0.99,  $P=0.03$ ) (Figure 2d).  
50  
51  
52

53  
54 In the octogenarian cohort (80–89 years old), statin therapy was associated with  
55  
56 significantly lower mid-term all-cause mortality (aHR 0.87, 95% CI 0.75–0.99,  $P=0.04$ )  
57  
58  
59  
60

1  
2  
3 (Figure 3a), but the impact in the nonagenarian cohort (90 years or older) appeared to be  
4  
5 lower (aHR 0.84, 95% CI 0.62-1.13,  $P=0.25$ ) (Figure 3b).  $P$  for interaction was 0.90.

7  
8 Furthermore, comparing the four groups according to previous CAD and statin therapy,  
9  
10 there was a significant difference in mid-term all-cause mortality ( $P<0.01$ ) (Figure 4).

11  
12 Patients who did not receive statin therapy despite a history of previous CAD showed the  
13  
14 worst prognosis (aHR 1.33, 95% CI 1.12-1.57 [patients who received statin without previous  
15  
16 CAD as a reference]). Their survival curve diverged from that of the patients without previous  
17  
18 CAD or statin after 1 year. In addition, patients with previous CAD and statin therapy (aHR  
19  
20 1.04, 95% CI 0.87-1.23) seemed to obtain similar risks with those who did not have previous  
21  
22 CAD or statin therapy (aHR 1.11, 95% CI 0.96-1.27 [patients who received statin without  
23  
24 previous CAD as a reference]).

25  
26  
27  
28 The results of the univariate and multivariate Cox proportional hazards regression  
29  
30 analyses were shown in Table 3. Statin therapy at admission was independently associated  
31  
32 with lower all-cause mortality (aHR 0.86, 95% CI 0.77-0.95),  $P<0.01$ ).

## 37 DISCUSSION

38  
39  
40 The present study investigated the impact of statin therapy on mid-term mortality after TAVI  
41  
42 using a Japanese multicentre registry. Statin therapy at admission was associated with  
43  
44 significantly lower all-cause and cardiovascular mortality. It should be noted that the impact  
45  
46 of statin therapy attenuated in the nonagenarians. Furthermore, we demonstrated differences  
47  
48 in all-cause mortality according to the history of previous CAD and statin therapy. The  
49  
50 present study included the largest patient cohort (936 pairs of patients after PS matching) and  
51  
52 the first report to investigate the association of age and a history of previous CAD with the  
53  
54 impact of statin.  
55  
56  
57  
58  
59  
60

1  
2  
3 Few reports have assessed the impact of statin treatment on mortality after TAVI. Peri-  
4  
5 Okonny et al. demonstrated that statin therapy was associated with reductions in 2-year all-  
6  
7 cause (aHR 0.65, 95% CI 0.49–0.87,  $P=0.001$ ), cardiovascular (aHR 0.66, 95% CI 0.46–0.96,  
8  
9  $P=0.030$ ), and non-cardiovascular mortality (aHR 0.64, 95% CI 0.44–0.99,  $P=0.045$ )  
10  
11 compared with no statin therapy, with a large cohort using PARTNER II and Sapien 3 clinical  
12  
13 trials or associated registries (626 pairs of patients after PS matching).[7] Merdler et al.  
14  
15 showed that high-intensity statin therapy was associated with a reduction in mortality after  
16  
17 TAVI (median follow-up period: 2.5 years) using data of 1238 cases from a single-centre  
18  
19 registry (aHR 0.59, 95% CI 0.37–0.96,  $P=0.03$ ).[15] Huded et al. also showed that high-  
20  
21 intensity statin therapy was associated with a reduction in all-cause mortality (mean survival:  
22  
23 3.9 years) based on 294 cases (aHR 0.36, 95% CI 0.14–0.90,  $P=0.029$ ).[16] Takagi et al.  
24  
25 reported similar results following a meta-analysis.[17] These results were consistent with our  
26  
27 results.  
28  
29  
30  
31  
32

33 The mechanism through which statin therapy reduces the risks of all-cause and  
34  
35 cardiovascular mortality is thought to be associated with a reduction in ischaemic events.[7,  
36  
37 15, 16, 17] However, there are limited data relative to statin therapy in octogenarians and  
38  
39 nonagenarians, as are data not only on TAVI but also on statin therapy as primary and  
40  
41 secondary prevention. The PROspective Study of Pravastatin in the Elderly at Risk trial was  
42  
43 the only randomised controlled trial for elderly patients (aged 70–82 years) with a history or  
44  
45 risk factors of vascular disease. The study revealed that pravastatin led to a 3-year reduced  
46  
47 risk of CAD.[18] Recommendation of statin therapy for very elderly patients varies among  
48  
49 the guidelines.[19, 20, 21, 22, 23] Very recently, a few reports supporting statin therapy for  
50  
51 very elderly patients have been published. In the Patient and Provider Assessment of Lipid  
52  
53 Management Registry, statin therapy appeared to be similarly tolerated by patients older and  
54  
55 younger than 75 years.[24] The Cholesterol Treatment Trialists' Collaboration demonstrated  
56  
57  
58  
59  
60

1  
2  
3 that statin therapy as primary and secondary prevention produced significant reductions in  
4 major vascular events even in patients older than 75 years.[25] Furthermore, Romas et al.  
5 revealed that statin therapy was associated with significant reductions in atherosclerotic  
6 cardiovascular events and all-cause mortality for patients who were older than 74 years and  
7 had diabetes.[26] Interestingly, Giral et al. demonstrated that statin discontinuation in 75-  
8 year-old primary prevention patients was associated with a 33% increased risk of  
9 cardiovascular events.[27] Our present study was consistent with these reports and indicated  
10 that statin therapy would be effective for very elderly and atherosclerotic high-risk patients by  
11 reducing cardiovascular events and mortality. Conversely, Romas et al. reported that the  
12 benefits of statin therapy disappeared in nonagenarians,[26] as observed in our nonagenarian  
13 cohort. However, P for interaction among the octogenarian and nonagenarian cohorts in the  
14 present study was not significant, and the sizes of the cohorts and confounding regarding  
15 prescribing statin to nonagenarians with CAD might skew the results.

16  
17  
18  
19  
20  
21  
22  
23  
24  
25  
26  
27  
28  
29  
30  
31  
32  
33 The statin effect generally appears after 1 year compared with placebo.[7, 28] Patients  
34 with a history of previous CAD who did not receive statin therapy appeared to have higher  
35 mortality rates after 1 year in the present study. In addition, our analysis the combining  
36 history of previous CAD and statin therapy implied that TAVI patients with the previous  
37 CAD might be able to achieve a similar reduction in mortality risk as those patients who had  
38 no previous CAD or statin treatment.

39  
40  
41  
42  
43  
44  
45  
46  
47  
48  
49  
50  
51  
52  
53  
54  
55  
56  
57  
58  
59  
60  
The present study had some limitations. First, this is an observational study, and unknown and unmeasurable factors may have confounded the relationship between statin therapy and mortality. However, a multicentre approach enabled us to accumulate a relatively large number of patients and we used PS matching analysis, the IPTW model, and the Cox proportional hazards regression model to confirm the robustness of the results. Second, a generalisation of the present results may be slightly limited due to the differences between the

1  
2  
3 matched and unmatched group as it might be plausible given the results of the IPTW model.  
4  
5 In addition, generalising our findings outside Japan also requires attention since this study  
6  
7 included only Japanese patients. Third, information on the type and doses of statin therapy  
8  
9 was not obtained. Usage of ezetimibe or proprotein convertase subtilisin/kexin type 9  
10  
11 inhibitor was not recorded in this study. Fourth, we assessed statin use only on admission and  
12  
13 there was a possibility that statin therapy might have changed at discharge or during follow-  
14  
15 up. The duration of statin administration and the timing to start prescribing statin were not  
16  
17 captured in the present study. Finally, we could not assess intolerance in patients eligible for  
18  
19 statin treatment but who could not continue treatment due to statin side effects such as  
20  
21 rhabdomyolysis. Further studies, including a randomised controlled trial, on statin therapy  
22  
23 following TAVI are warranted to resolve these limitations.  
24  
25  
26  
27

28 In conclusion, using data from the large multicentre registry, statin therapy at admission  
29  
30 of TAVI was associated with significant reductions in mid-term all-cause and cardiovascular  
31  
32 mortality. Statin therapy prior TAVI will be beneficial even in octogenarians, but the benefits  
33  
34 may disappear in nonagenarians. In addition, statin therapy will be essential for TAVI patients  
35  
36 with CAD. Further researches are warranted to confirm and generalise our findings, since the  
37  
38 present study has several inherent limitations of the observational study and included only  
39  
40 Japanese patients.  
41  
42  
43  
44  
45  
46  
47  
48  
49  
50  
51  
52  
53  
54  
55  
56  
57  
58  
59  
60

### **Acknowledgements**

We express our heartfelt gratitude to the team members at our hospital and other hospitals participating in the multicentre registry and the Japan Society of Clinical Research (<http://www.japanscr.org/>) for their dedicated support.

### **Funding**

The OCEAN-TAVI registry is supported by Edwards Lifesciences, Medtronic, Boston Scientific, Abbott Medical, and Daiichi-Sankyo Company. There are no award/grant numbers for the Funders.

### **Conflict of interest**

Drs. Yamamoto, Tada, Naganuma, Shirai, Mizutani, Tabata, Ueno, and Watanabe are clinical proctors for Edwards Lifesciences and Medtronic. Drs. Shimizu, Takagi and Hayashida are clinical proctors of Edwards Lifesciences. Dr. Inohara received a research grant from Boston Scientific. Dr. Kohsaka received lecture fees and research grants from Pfizer Japan, Bayer, Daiichi Sankyo, and Bristol-Myers Squibb. The remaining authors have nothing to disclose.

### **Data availability**

The data underlying this article cannot be shared publicly due to the privacy of individuals that participated in the study. The data will be shared on reasonable request to the corresponding author.

### **Authors' contributions**

Conception or design of the work: Fumiaki Yashima, Shinichi Shirai, Toru Naganuma, Kazuki Mizutani, Motoharu Araki, Minoru Tabata, and Futoshi Yamanaka.



1  
2  
3 Data collection: Makoto Tanaka, Masahiro Jinzaki, Hideyuki Shimizu, and Keiichi Fukuda.  
4

5 Data analysis and interpretation: Masahiko Hara, Taku Inohara, Kensuke Takagi, Hiroshi  
6  
7 Ueno, and Norio Tada.  
8

9  
10 Drafting the article: Fumiaki Yashima and Taku Inohara.  
11

12 Critical revision of the article: Masanori Yamamoto, Yusuke Watanabe, Kentaro Hayashida.  
13

14 Final approval of the version to be published: all authors.  
15  
16  
17  
18  
19  
20  
21  
22  
23  
24  
25  
26  
27  
28  
29  
30  
31  
32  
33  
34  
35  
36  
37  
38  
39  
40  
41  
42  
43  
44  
45  
46  
47  
48  
49  
50  
51  
52  
53  
54  
55  
56  
57  
58  
59  
60

For peer review only

## References

- 1 Mack MJ, Leon MB, Smith CR, et al. PARTNER 1 trial investigators, 5-year outcomes of  
2 transcatheter aortic valve replacement or surgical aortic valve replacement for high surgical  
3 risk patients with aortic stenosis (PARTNER 1): a randomised controlled trial. *Lancet*  
4 2015;385:2477–84.
- 5  
6  
7  
8  
9  
10  
11  
12  
13  
14  
15  
16  
17  
18  
19  
20  
21  
22  
23  
24  
25  
26  
27  
28  
29  
30  
31  
32  
33  
34  
35  
36  
37  
38  
39  
40  
41  
42  
43  
44  
45  
46  
47  
48  
49  
50  
51  
52  
53  
54  
55  
56  
57  
58  
59  
60
- 2 Kapadia SR, Leon MB, Makkar RR, et al. 5-year outcomes of transcatheter aortic valve  
replacement compared with standard treatment for patients with inoperable aortic stenosis  
(PARTNER 1): a randomised controlled trial. *Lancet* 2015;385:2485–91.
- 3 Popma JJ, Deeb GM, Yakubov SJ et al. Transcatheter aortic-valve replacement with a self-  
expanding valve in low-risk patients. *N Engl J Med* 2019;380:1706–15.
- 4 Mack MJ, Leon MB, Thourani VH, et al. Transcatheter aortic-valve replacement with a  
balloon-expandable valve in low-risk patients. *N Engl J Med* 2019;380:1695–705.
- 5 Chakos A, Wilson-Smith A, Arora S, et al. Long term outcomes of transcatheter aortic  
valve implantation (TAVI): a systematic review of 5-year survival and beyond. *Ann*  
*Cardiothorac Surg* 2017;6:432–43.
- 6 Holmes DR Jr, Brennan JM, Rumsfeld JS, et al. Clinical outcomes at 1 year following  
transcatheter aortic valve replacement. *JAMA* 2015;313:1019–28.
- 7 Peri-Okonny PA, Liu Y, Malaisrie SC, et al. Association of statin use and mortality after  
transcatheter aortic valve replacement. *J Am Heart Assoc* 2019;8:e011529.
- 8 Shimura T, Yamamoto M, Kano S, et al. Impact of the Clinical Frailty Scale on outcomes  
after transcatheter aortic valve replacement. *Circulation* 2017;135:2013–24.
- 9 Yashima F, Yamamoto M, Tanaka M, et al. Transcatheter aortic valve implantation in  
patients with an extremely small native aortic annulus: the OCEAN-TAVI registry. *Int J*  
*Cardiol* 2017;240:126–31.

1  
2  
3 10 Kataoka A, Watanabe Y, Kozuma K, et al. Prognostic impact of low-flow severe aortic  
4 stenosis in small-body patients undergoing TAVR: the OCEAN-TAVI registry. *JACC*  
5  
6 *Cardiovasc Imaging* 2018;11:659–69.  
7

8  
9  
10 11 Kappetein AP, Head SJ, Genereux P, et al. Updated standardized endpoint definitions for  
11  
12 transcatheter aortic valve implantation: the Valve Academic Research Consortium-2  
13  
14 consensus document. *J Am Coll Cardiol* 2012;60:1438–54.  
15

16  
17 12 Rosenbaum PR, Rubin DB. The central role of the propensity score in observational  
18  
19 studies for causal effects. *Biometrika* 1983;70:41–55.  
20

21  
22 13 Weitzen S, Lapane KL, Toledano AY, et al. Principles for modeling propensity scores in  
23  
24 medical research: a systematic literature review. *Pharmacoepidemiol Drug Saf* 2004;13:841–  
25  
26 53.  
27

28  
29 14 Austin PC. The performance of different propensity score methods for estimating marginal  
30  
31 hazard ratios. *Stat Med* 2013;32:2837–49.  
32

33  
34 15 Merdler I, Rozenbaum Z, Finkelstein A, et al. Effect of statin therapy and long-term  
35  
36 mortality following transcatheter aortic valve implantation. *Am J Cardiol* 2019;123:1978–82.  
37

38  
39 16 Huded CP, Benck LR, Stone NJ, et al. Relation of intensity of statin therapy and outcomes  
40  
41 after transcatheter aortic valve replacement. *Am J Cardiol* 2017;119:1832–38.  
42

43  
44 17 Takagi H, Hari Y, Nakashima K, et al. Meta-analysis for impact of statin on mortality after  
45  
46 transcatheter aortic valve implantation. *Am J Cardiol* 2019;124:920–25.  
47

48  
49 18 Shepherd J, Blauw GJ, Murphy MB, et al. Pravastatin in elderly individuals at risk of  
50  
51 vascular disease (PROSPER): a randomised controlled trial. *Lancet* 2002;360:1623–30.  
52

53  
54 19 Mortensen MB, Falk E. Primary prevention with statins in the elderly. *J Am Coll Cardiol*  
55  
56 2018;71:85–94.  
57

58  
59 20 Piepoli MF, Hoes AW, Agewall S, et al. 2016 European Guidelines on cardiovascular  
60  
disease prevention in clinical practice: The Sixth Joint Task Force of the European Society of

1  
2  
3 Cardiology and other societies on cardiovascular disease prevention in clinical practice  
4  
5 (constituted by representatives of 10 societies and by invited experts) developed with the  
6  
7 special contribution of the European Association for Cardiovascular Prevention &  
8  
9 Rehabilitation (EACPR). *Eur Heart J* 2016;37:2315–81.

10  
11  
12 21 Bibbins-Domingo K, Grossman DC, Curry SJ, et al. Statin use for the primary prevention  
13  
14 of cardiovascular disease in adults: US Preventive Services Task Force recommendation  
15  
16 statement. *JAMA* 2016;316:1997–2007.

17  
18  
19 22 Anderson TJ, Gregoire J, Pearson GJ, et al. 2016 Canadian Cardiovascular Society  
20  
21 guidelines for the management of dyslipidemia for the prevention of cardiovascular disease in  
22  
23 the adult. *Can J Cardiol* 2016;32:1263–82.

24  
25  
26 23 National Clinical Guideline Centre. Lipid Modification: Cardiovascular risk assessment  
27  
28 and the modification of blood lipids for the primary and secondary prevention of  
29  
30 cardiovascular disease. London, UK: National Institute for Health and Care Excellence 2014.

31  
32  
33 24 Nanna MG, Navar AM, Wang TY, et al. Statin use and adverse effects among adults >75  
34  
35 years of age: insights from the Patient and Provider Assessment of Lipid Management  
36  
37 (PALM) registry. *J Am Heart Assoc* 2018;7:e008546.

38  
39  
40 25 Cholesterol Treatment Trialists' Collaboration. Efficacy and safety of statin therapy in  
41  
42 older people: a meta-analysis of individual participant data from 28 randomised controlled  
43  
44 trials. *Lancet* 2019;393:407–15.

45  
46  
47 26 Ramos R, Comas-Cufi M, Marti-Lluch R, et al. Statins for primary prevention of  
48  
49 cardiovascular events and mortality in old and very old adults with and without type 2  
50  
51 diabetes: retrospective cohort study. *BMJ* 2018;362:k3359.

52  
53  
54 27 Giral P, Neumann A, Weill A, et al. Cardiovascular effect of discontinuing statins for  
55  
56 primary prevention at the age of 75 years: a nationwide population-based cohort study in  
57  
58 France. *Eur Heart J* 2019;40:3516–25.

1  
2  
3 28 Scandinavian Simvastatin Survival Study Group. Randomised trial of cholesterol lowering  
4 in 4444 patients with coronary heart disease: the Scandinavian Simvastatin Survival Study  
5  
6 (4S). *Lancet* 1994;344:1383–89.  
7  
8  
9  
10  
11  
12  
13  
14  
15  
16  
17  
18  
19  
20  
21  
22  
23  
24  
25  
26  
27  
28  
29  
30  
31  
32  
33  
34  
35  
36  
37  
38  
39  
40  
41  
42  
43  
44  
45  
46  
47  
48  
49  
50  
51  
52  
53  
54  
55  
56  
57  
58  
59  
60

For peer review only

1  
2  
3 **Figure legends**  
4  
5  
6

7  
8 **Figure 1**  
9

10 Flowchart of patient selection for the present study.

11  
12 OCEAN; Optimized CathEter vAlvular iNtervention; TAVI, transcatheter aortic valve  
13  
14 implantation.  
15  
16

17  
18  
19 **Figure 2**  
20

21 Kaplan-Meier curves for mid-term and 30-day mortality in the matched cohort. *a, b, c*:

22  
23 Kaplan-Meier curves for mid-term all-cause mortality (*a*), CV mortality (*b*), and non-CV

24  
25 mortality (*c*) in the matched cohort. *d*: Kaplan-Meier curve for 30-day all-cause mortality and  
26  
27 mid-term all-cause mortality with the landmark analysis from 30 days in the matched cohort.  
28  
29

30 CI, confidence interval; CV, cardiovascular; HR, hazard ratio.  
31  
32  
33  
34

35 **Figure 3**  
36

37 Kaplan-Meier curves for all-cause mortality in the octogenarian and nonagenarian cohort.  
38  
39  
40  
41

42 **Figure 4**  
43

44 Kaplan-Meier curve for all-cause mortality according to previous coronary artery disease and  
45  
46 statin therapy in the overall cohort.  
47  
48

49 CAD, coronary artery disease.  
50  
51  
52  
53  
54  
55  
56  
57  
58  
59  
60

**Table 1**

Patient characteristics before and after propensity score matching

|                                   | Before matching              |                              |                            | After matching              |                             |                            |
|-----------------------------------|------------------------------|------------------------------|----------------------------|-----------------------------|-----------------------------|----------------------------|
|                                   | Statin (+)<br><i>n</i> =1065 | Statin (-)<br><i>n</i> =1523 | Standardised<br>difference | Statin (+)<br><i>n</i> =936 | Statin (-)<br><i>n</i> =936 | Standardised<br>difference |
| Preprocedural variables           |                              |                              |                            |                             |                             |                            |
| Age, years                        | 84.1±5.0                     | 84.6±5.3                     | 0.01                       | 84.2±5.0                    | 84.3±5.2                    | 0.01                       |
| Men, <i>n</i> (%)                 | 322 (30.2%)                  | 473 (31.1%)                  | 0.02                       | 277 (29.6%)                 | 255 (27.2%)                 | 0.05                       |
| Body surface area, m <sup>2</sup> | 1.44±0.17                    | 1.42±0.17                    | 0.13                       | 1.44±0.17                   | 1.43±0.17                   | 0.07                       |

|    |                                              |             |              |      |             |             |       |
|----|----------------------------------------------|-------------|--------------|------|-------------|-------------|-------|
| 1  |                                              |             |              |      |             |             |       |
| 2  |                                              |             |              |      |             |             |       |
| 3  |                                              |             |              |      |             |             |       |
| 4  | NYHA class 3 or 4, <i>n</i> (%)              | 518 (48.6%) | 803 (52.7%)  | 0.08 | 462 (49.4%) | 457 (48.8%) | 0.01  |
| 5  |                                              |             |              |      |             |             |       |
| 6  |                                              |             |              |      |             |             |       |
| 7  |                                              |             |              |      |             |             |       |
| 8  | Clinical Frailty Scale                       | 3.8±1.2     | 4.1±1.3      | 0.23 | 3.8±1.2     | 3.8±1.2     | 0.04  |
| 9  |                                              |             |              |      |             |             |       |
| 10 |                                              |             |              |      |             |             |       |
| 11 | Diabetes mellitus, <i>n</i> (%)              | 264 (24.8%) | 291 (19.1%)  | 0.14 | 207 (22.1%) | 195 (20.8%) | 0.03  |
| 12 |                                              |             |              |      |             |             |       |
| 13 |                                              |             |              |      |             |             |       |
| 14 |                                              |             |              |      |             |             |       |
| 15 | Smoking, <i>n</i> (%)                        | 212 (19.9%) | 260 (17.1%)  | 0.07 | 169 (18.1%) | 160 (17.1%) | 0.02  |
| 16 |                                              |             |              |      |             |             |       |
| 17 |                                              |             |              |      |             |             |       |
| 18 |                                              |             |              |      |             |             |       |
| 19 | Hypertension, <i>n</i> (%)                   | 861 (80.9%) | 1129 (74.1%) | 0.16 | 744 (79.5%) | 753 (80.5%) | 0.02  |
| 20 |                                              |             |              |      |             |             |       |
| 21 |                                              |             |              |      |             |             |       |
| 22 | Chronic kidney disease, <i>n</i> (%)         | 755 (70.9%) | 1054 (69.2%) | 0.04 | 651 (69.6%) | 640 (68.4%) | 0.03  |
| 23 |                                              |             |              |      |             |             |       |
| 24 |                                              |             |              |      |             |             |       |
| 25 |                                              |             |              |      |             |             |       |
| 26 | Atrial fibrillation, <i>n</i> (%)            | 195 (18.3%) | 354 (23.2%)  | 0.12 | 181 (19.3%) | 183 (19.6%) | 0.01  |
| 27 |                                              |             |              |      |             |             |       |
| 28 |                                              |             |              |      |             |             |       |
| 29 |                                              |             |              |      |             |             |       |
| 30 | Coronary artery disease, <i>n</i> (%)        | 507 (47.6%) | 447 (29.4%)  | 0.38 | 378 (40.4%) | 372 (39.7%) | 0.01  |
| 31 |                                              |             |              |      |             |             |       |
| 32 |                                              |             |              |      |             |             |       |
| 33 | Previous myocardial infarction, <i>n</i> (%) | 108 (10.1%) | 50 (3.3%)    | 0.28 | 48 (5.1%)   | 48 (5.1%)   | <0.01 |
| 34 |                                              |             |              |      |             |             |       |
| 35 |                                              |             |              |      |             |             |       |
| 36 |                                              |             |              |      |             |             |       |
| 37 |                                              |             |              |      |             |             |       |
| 38 |                                              |             |              |      |             |             |       |
| 39 |                                              |             |              |      |             |             |       |
| 40 |                                              |             |              |      |             |             |       |
| 41 |                                              |             |              |      |             |             |       |
| 42 |                                              |             |              |      |             |             |       |
| 43 |                                              |             |              |      |             |             |       |
| 44 |                                              |             |              |      |             |             |       |
| 45 |                                              |             |              |      |             |             |       |
| 46 |                                              |             |              |      |             |             |       |



|    |                                                        |             |             |      |             |             |       |
|----|--------------------------------------------------------|-------------|-------------|------|-------------|-------------|-------|
| 1  |                                                        |             |             |      |             |             |       |
| 2  |                                                        |             |             |      |             |             |       |
| 3  |                                                        |             |             |      |             |             |       |
| 4  | Previous percutaneous coronary intervention, <i>n</i>  |             |             |      |             |             |       |
| 5  |                                                        |             |             |      |             |             |       |
| 6  |                                                        |             |             |      |             |             |       |
| 7  | (%)                                                    | 342 (32.1%) | 284 (18.7%) | 0.31 | 249 (26.6%) | 238 (25.4%) | 0.03  |
| 8  |                                                        |             |             |      |             |             |       |
| 9  |                                                        |             |             |      |             |             |       |
| 10 |                                                        |             |             |      |             |             |       |
| 11 | Previous coronary artery bypass grafting, <i>n</i> (%) | 112 (10.5%) | 57 (3.7%)   | 0.27 | 60 (6.4%)   | 57 (6.1%)   | 0.01  |
| 12 |                                                        |             |             |      |             |             |       |
| 13 |                                                        |             |             |      |             |             |       |
| 14 |                                                        |             |             |      |             |             |       |
| 15 | Peripheral artery disease, <i>n</i> (%)                | 161 (15.1%) | 216 (14.2%) | 0.03 | 136 (14.5%) | 128 (13.7%) | 0.02  |
| 16 |                                                        |             |             |      |             |             |       |
| 17 |                                                        |             |             |      |             |             |       |
| 18 |                                                        |             |             |      |             |             |       |
| 19 | Previous stroke, <i>n</i> (%)                          | 127 (11.9%) | 174 (11.4%) | 0.02 | 116 (12.4%) | 102 (10.9%) | 0.05  |
| 20 |                                                        |             |             |      |             |             |       |
| 21 |                                                        |             |             |      |             |             |       |
| 22 | STS risk score                                         | 7.7±6.0     | 8.6±7.5     | 0.13 | 7.7±6.1     | 7.7±5.3     | <0.01 |
| 23 |                                                        |             |             |      |             |             |       |
| 24 |                                                        |             |             |      |             |             |       |
| 25 |                                                        |             |             |      |             |             |       |
| 26 | Renin-angiotensin inhibitor, <i>n</i> (%)              | 639 (60.0%) | 748 (49.1%) | 0.22 | 540 (57.7%) | 544 (58.1%) | 0.01  |
| 27 |                                                        |             |             |      |             |             |       |
| 28 |                                                        |             |             |      |             |             |       |
| 29 |                                                        |             |             |      |             |             |       |
| 30 | β blocker, <i>n</i> (%)                                | 384 (36.1%) | 496 (32.6%) | 0.07 | 334 (35.7%) | 303 (32.4%) | 0.07  |
| 31 |                                                        |             |             |      |             |             |       |
| 32 |                                                        |             |             |      |             |             |       |
| 33 | eGFR, mL/min/1.73 m <sup>2</sup>                       | 51.7±18.5   | 51.1±20.1   | 0.03 | 52.3±18.6   | 51.7±19.6   | 0.03  |
| 34 |                                                        |             |             |      |             |             |       |
| 35 |                                                        |             |             |      |             |             |       |
| 36 |                                                        |             |             |      |             |             |       |
| 37 | Haemoglobin, g/dL                                      | 11.4±1.7    | 11.1±1.7    | 0.17 | 11.4±1.7    | 11.2±1.6    | 0.15  |
| 38 |                                                        |             |             |      |             |             |       |
| 39 |                                                        |             |             |      |             |             |       |
| 40 |                                                        |             |             |      |             |             |       |
| 41 |                                                        |             |             |      |             |             |       |
| 42 |                                                        |             |             |      |             |             |       |
| 43 |                                                        |             |             |      |             |             |       |
| 44 |                                                        |             |             |      |             |             |       |
| 45 |                                                        |             |             |      |             |             |       |
| 46 |                                                        |             |             |      |             |             |       |

|                                                            |            |            |       |            |            |       |
|------------------------------------------------------------|------------|------------|-------|------------|------------|-------|
| LDL-c, mg/dL                                               | 104.3±28.9 | 94.2±28.0  | 0.35  | 105.9±28.2 | 94.8±27.8  | 0.4   |
| HDL-c, mg/dL                                               | 52.9±15.8  | 53.6±15.0  | 0.04  | 53.5±16.3  | 54.3±15.0  | 0.05  |
| Triglyceride, mg/dL                                        | 106.8±57.6 | 110.5±53.0 | 0.07  | 109.6±60.9 | 110.2±53.2 | 0.01  |
| Preprocedural echocardiographic data                       |            |            |       |            |            |       |
| Aortic valve area, cm <sup>2</sup>                         | 0.64±0.17  | 0.63±0.17  | 0.04  | 0.63±0.17  | 0.63±0.16  | <0.01 |
| Indexed aortic valve area, cm <sup>2</sup> /m <sup>2</sup> | 0.44±0.12  | 0.44±0.12  | <0.01 | 0.44±0.12  | 0.45±0.12  | 0.03  |
| Mean aortic gradient, mmHg                                 | 50.0±18.1  | 51.0±18.4  | 0.05  | 51.0±18.2  | 50.8±18.2  | 0.01  |
| Peak velocity, m/sec                                       | 4.5±0.8    | 4.6±0.8    | 0.07  | 4.6±0.8    | 4.6±0.8    | 0.02  |
| Ejection fraction, %                                       | 59.2±12.7  | 59.2±12.6  | <0.01 | 59.6±12.4  | 59.7±12.0  | 0.01  |
| Severe aortic regurgitation, <i>n</i> (%)                  | 12 (0.8%)  | 4 (0.4%)   | 0.05  | 7 (0.8%)   | 4 (0.4%)   | 0.04  |

|                                           |             |              |      |             |             |      |
|-------------------------------------------|-------------|--------------|------|-------------|-------------|------|
| Severe mitral regurgitation, <i>n</i> (%) | 21 (1.4%)   | 12 (1.1%)    | 0.02 | 12 (1.3%)   | 6 (0.6%)    | 0.07 |
| Pulmonary hypertension, <i>n</i> (%)      | 40 (3.8%)   | 62 (4.1%)    | 0.02 | 37 (4.0%)   | 33 (3.5%)   | 0.02 |
| Preprocedural CT data                     |             |              |      |             |             |      |
| Annular area, mm <sup>2</sup>             | 395.5±70.7  | 400.7±71.0   | 0.07 | 395.9±70.2  | 396.5±69.1  | 0.01 |
| Procedural variables                      |             |              |      |             |             |      |
| Transfemoral approach, <i>n</i> (%)       | 873 (82.0%) | 1294 (85.0%) | 0.08 | 770 (82.3%) | 784 (83.8%) | 0.04 |
| Local anaesthesia, <i>n</i> (%)           | 799 (75.0%) | 1179 (77.4%) | 0.06 | 714 (76.3%) | 734 (78.4%) | 0.05 |
| Contrast volume, mL                       | 115.8±59.1  | 115.4±58.0   | 0.01 | 118.8±60.0  | 113.5±57.1  | 0.09 |
| Fluoroscopy time, min                     | 21.7±12.5   | 21.1±10.0    | 0.05 | 21.9±12.6   | 21.0±10.0   | 0.08 |
| Procedure time, min                       | 81.6±45.8   | 80.3±45.4    | 0.03 | 81.6±43.0   | 80.4±43.6   | 0.03 |

1  
2  
3 CT, computed tomography; eGFR, estimated glomerular filtration rate; HDL-c, high-density lipoprotein cholesterol; LDL-c, low-density  
4  
5 lipoprotein cholesterol; NYHA, New York Heart Association; STS, Society of Thoracic Surgeons.  
6  
7  
8  
9  
10  
11  
12  
13  
14  
15  
16  
17  
18  
19  
20  
21  
22  
23  
24  
25  
26  
27  
28  
29  
30  
31  
32  
33  
34  
35  
36  
37  
38  
39  
40  
41  
42  
43  
44  
45  
46

For peer review only

**Table 2**

In-hospital outcomes before and after propensity score matching

|                                     | Before matching |                |                |            | After matching |               |                |            |
|-------------------------------------|-----------------|----------------|----------------|------------|----------------|---------------|----------------|------------|
|                                     |                 |                | Standardised   |            |                |               | Standardised   |            |
|                                     | Statin (+)      | Statin (-)     | <i>P</i> value | difference | Statin (+)     | Statin (-)    | <i>P</i> value | difference |
|                                     | <i>n</i> =1065  | <i>n</i> =1523 |                |            | <i>n</i> =936  | <i>n</i> =936 |                |            |
| All-cause mortality, <i>n</i> (%)   | 27 (2.5%)       | 43 (2.8%)      | 0.66           | 0.02       | 20 (2.1%)      | 23 (2.5%)     | 0.64           | 0.02       |
| Acute kidney injury, <i>n</i> (%)   | 111 (10.4%)     | 178 (11.7%)    | 0.31           | 0.04       | 96 (10.3%)     | 105 (11.2%)   | 0.50           | 0.03       |
| Stroke, <i>n</i> (%)                | 27 (2.5%)       | 34 (2.2%)      | 0.62           | 0.02       | 24 (2.6%)      | 19 (2.0%)     | 0.44           | 0.04       |
| Vascular complication, <i>n</i> (%) | 105 (9.9%)      | 128 (8.4%)     | 0.21           | 0.05       | 90 (9.6%)      | 78 (8.3%)     | 0.33           | 0.05       |

| Postprocedural echocardiographic data                           |           |            |      |      |           |           |      |       |  |
|-----------------------------------------------------------------|-----------|------------|------|------|-----------|-----------|------|-------|--|
| Effective orifice area, cm <sup>2</sup>                         | 1.67±0.45 | 1.69±0.45  | 0.53 | 0.03 | 1.68±0.44 | 1.66±0.43 | 0.34 | 0.04  |  |
| Indexed effective orifice area, cm <sup>2</sup> /m <sup>2</sup> | 1.17±0.32 | 1.20±0.31  | 0.02 | 0.10 | 1.18±0.32 | 1.18±0.30 | 0.99 | <0.01 |  |
| Mean aortic gradient, mmHg                                      | 11.0±4.4  | 10.6±4.7   | 0.08 | 0.07 | 11.0±4.4  | 11.0±4.9  | 0.92 | <0.01 |  |
| Peak velocity, m/sec                                            | 2.3±0.4   | 2.2±0.5    | 0.10 | 0.07 | 2.3±0.5   | 2.3±0.5   | 0.98 | <0.01 |  |
| Moderate or severe aortic regurgitation, <i>n</i> (%)           | 18 (1.7%) | 31 (2.1%)  | 0.51 | 0.03 | 17 (1.8%) | 20 (2.2%) | 0.61 | 0.02  |  |
| Moderate or severe mitral regurgitation, <i>n</i> (%)           | 59 (5.6%) | 100 (6.6%) | 0.27 | 0.04 | 45 (4.8%) | 51 (5.5%) | 0.52 | 0.03  |  |

**Table 3**

The univariate and multivariate Cox proportional regression analyses of the all-cause mortality in the overall cohort.

|                                | Univariate analysis |         | Multivariate analysis |         |
|--------------------------------|---------------------|---------|-----------------------|---------|
|                                | HR (95% CI)         | P value | adjusted HR (95% CI)  | P value |
| Men                            | 1.30 (1.18-1.42)    | <0.01   | 1.40 (1.25-1.57)      | <0.01   |
| Age                            | 1.01 (0.99-1.03)    | 0.13    | 0.99 (0.97-1.01)      | 0.31    |
| Clinical Frailty Scale 1-3     | 0.77 (0.70-0.85)    | <0.01   | 0.81 (0.73-0.90)      | <0.01   |
| NYHA class 3 or 4              | 1.33 (1.21-1.46)    | <0.01   | 1.18 (1.07-1.31)      | <0.01   |
| Smoking                        | 1.20 (1.08-1.33)    | <0.01   | 1.02 (0.90-1.15)      | 0.74    |
| Diabetes mellitus              | 1.12 (1.00-1.24)    | 0.04    | 0.99 (0.89-1.11)      | 0.87    |
| Hypertension                   | 0.97 (0.88-1.09)    | 0.63    | 0.97 (0.86-1.08)      | 0.54    |
| Previous myocardial infarction | 1.32 (1.13-1.52)    | <0.01   | 1.14 (0.96-1.35)      | 0.14    |

|    |                                          |                  |       |                  |       |
|----|------------------------------------------|------------------|-------|------------------|-------|
| 1  |                                          |                  |       |                  |       |
| 2  |                                          |                  |       |                  |       |
| 3  |                                          |                  |       |                  |       |
| 4  | Previous coronary artery bypass grafting | 1.21 (1.02-1.40) | 0.03  | 1.05 (0.88-1.24) | 0.60  |
| 5  |                                          |                  |       |                  |       |
| 6  |                                          |                  |       |                  |       |
| 7  | Peripheral artery disease                | 1.35 (1.21-1.50) | <0.01 | 1.08 (0.95-1.22) | 0.24  |
| 8  |                                          |                  |       |                  |       |
| 9  |                                          |                  |       |                  |       |
| 10 | Previous stroke                          | 1.14 (0.99-1.30) | 0.06  | 1.04 (0.90-1.19) | 0.62  |
| 11 |                                          |                  |       |                  |       |
| 12 |                                          |                  |       |                  |       |
| 13 | Atrial fibrillation                      | 1.19 (1.07-1.32) | <0.01 | 1.00 (0.90-1.12) | 0.98  |
| 14 |                                          |                  |       |                  |       |
| 15 |                                          |                  |       |                  |       |
| 16 | STS risk score                           | 1.04 (1.03-1.04) | <0.01 | 1.02 (1.01-1.03) | <0.01 |
| 17 |                                          |                  |       |                  |       |
| 18 |                                          |                  |       |                  |       |
| 19 |                                          |                  |       |                  |       |
| 20 | eGFR, mL/min/1.73 m <sup>2</sup>         | 0.98 (0.98-0.99) | <0.01 | 0.99 (0.99-1.00) | <0.01 |
| 21 |                                          |                  |       |                  |       |
| 22 |                                          |                  |       |                  |       |
| 23 | Haemoglobin, g/dL                        | 0.83 (0.78-0.88) | <0.01 | 0.85 (0.80-0.91) | <0.01 |
| 24 |                                          |                  |       |                  |       |
| 25 |                                          |                  |       |                  |       |
| 26 | Medication at admission                  |                  |       |                  |       |
| 27 |                                          |                  |       |                  |       |
| 28 |                                          |                  |       |                  |       |
| 29 | Statin                                   | 0.84 (0.77-0.93) | <0.01 | 0.86 (0.77-0.95) | <0.01 |
| 30 |                                          |                  |       |                  |       |
| 31 |                                          |                  |       |                  |       |
| 32 | Renin-angiotensin inhibitor              | 0.92 (0.84-1.01) | 0.08  | 0.88 (0.80-0.97) | 0.01  |
| 33 |                                          |                  |       |                  |       |
| 34 |                                          |                  |       |                  |       |
| 35 | β blocker                                | 1.09 (0.99-1.20) | 0.08  | 1.06 (0.96-1.16) | 0.28  |
| 36 |                                          |                  |       |                  |       |
| 37 |                                          |                  |       |                  |       |
| 38 | Preprocedural echocardiographic data     |                  |       |                  |       |
| 39 |                                          |                  |       |                  |       |
| 40 |                                          |                  |       |                  |       |
| 41 |                                          |                  |       |                  |       |
| 42 |                                          |                  |       |                  |       |
| 43 |                                          |                  |       |                  |       |
| 44 |                                          |                  |       |                  |       |
| 45 |                                          |                  |       |                  |       |
| 46 |                                          |                  |       |                  |       |



|    |                                                    |                  |       |                  |       |
|----|----------------------------------------------------|------------------|-------|------------------|-------|
| 1  |                                                    |                  |       |                  |       |
| 2  |                                                    |                  |       |                  |       |
| 3  |                                                    |                  |       |                  |       |
| 4  | Aortic valve area, cm <sup>2</sup> /m <sup>2</sup> | 1.29 (0.76-2.20) | 0.35  | 1.23 (0.63-2.38) | 0.54  |
| 5  |                                                    |                  |       |                  |       |
| 6  |                                                    |                  |       |                  |       |
| 7  | Peak velocity, mmHg                                | 0.75 (0.67-0.85) | <0.01 | 0.76 (0.66-0.88) | <0.01 |
| 8  |                                                    |                  |       |                  |       |
| 9  |                                                    |                  |       |                  |       |
| 10 | Ejection fraction, %                               | 0.99 (0.98-0.99) | 0.03  | 1.01 (1.00-1.02) | 0.02  |
| 11 |                                                    |                  |       |                  |       |
| 12 |                                                    |                  |       |                  |       |
| 13 | Pulmonary hypertension                             | 1.50 (1.25-1.78) | <0.01 | 1.27 (1.05-1.53) | 0.01  |
| 14 |                                                    |                  |       |                  |       |
| 15 |                                                    |                  |       |                  |       |
| 16 | Severe aortic regurgitation                        | 0.56 (0.13-1.19) | 0.16  | 0.57 (0.21-1.51) | 0.26  |
| 17 |                                                    |                  |       |                  |       |
| 18 |                                                    |                  |       |                  |       |
| 19 | Severe mitral regurgitation                        | 1.34 (0.93-1.81) | 0.11  | 0.99 (0.70-1.40) | 0.96  |
| 20 |                                                    |                  |       |                  |       |
| 21 |                                                    |                  |       |                  |       |
| 22 | Procedural variables                               |                  |       |                  |       |
| 23 |                                                    |                  |       |                  |       |
| 24 |                                                    |                  |       |                  |       |
| 25 | Transfemoral approach                              | 0.81 (0.73-0.91) | <0.01 | 0.87 (0.77-0.98) | 0.03  |
| 26 |                                                    |                  |       |                  |       |
| 27 |                                                    |                  |       |                  |       |
| 28 | Local anaesthesia                                  | 0.89 (0.79-1.01) | 0.07  | 0.92 (0.81-1.05) | 0.22  |
| 29 |                                                    |                  |       |                  |       |
| 30 |                                                    |                  |       |                  |       |

31  
32  
33 CI, confidence interval; eGFR, estimated glomerular filtration rate; HR, hazard ratio; NYHA, New York Heart Association; STS, Society of  
34  
35  
36 Thoracic Surgeons.

1  
2  
3  
4  
5  
6  
7  
8  
9  
10  
11  
12  
13  
14  
15  
16  
17  
18  
19  
20  
21  
22  
23  
24  
25  
26  
27  
28  
29  
30  
31  
32  
33  
34  
35  
36  
37  
38  
39  
40  
41  
42  
43  
44  
45  
46  
47  
48  
49  
50  
51  
52  
53  
54  
55  
56  
57  
58  
59  
60

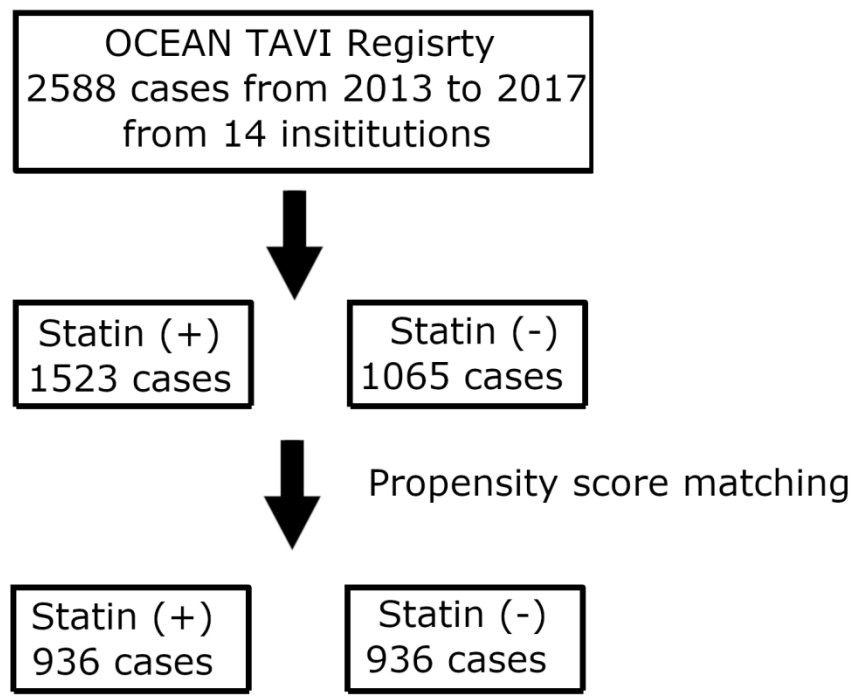

Flowchart of patient selection for the present study.

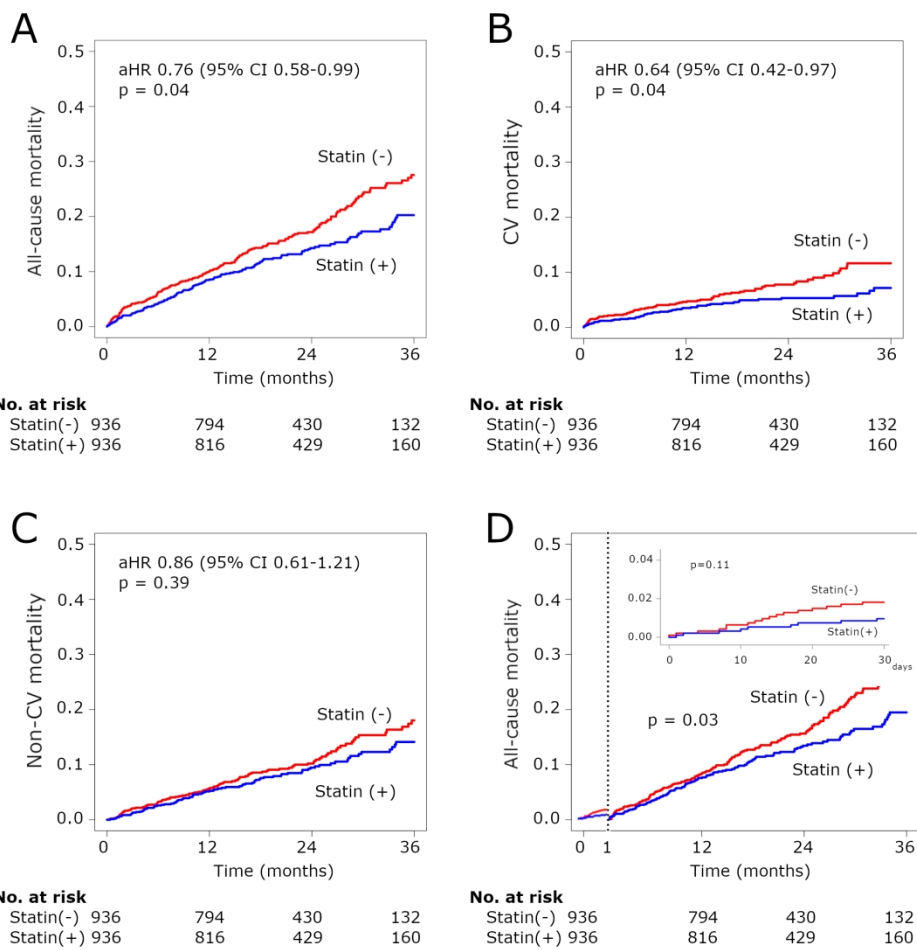

Kaplan-Meier curves for mid-term and 30-day mortality in the matched cohort.

1  
2  
3  
4  
5  
6  
7  
8  
9  
10  
11  
12  
13  
14  
15  
16  
17  
18  
19  
20  
21  
22  
23  
24  
25  
26  
27  
28  
29  
30  
31  
32  
33  
34  
35  
36  
37  
38  
39  
40  
41  
42  
43  
44  
45  
46  
47  
48  
49  
50  
51  
52  
53  
54  
55  
56  
57  
58  
59  
60

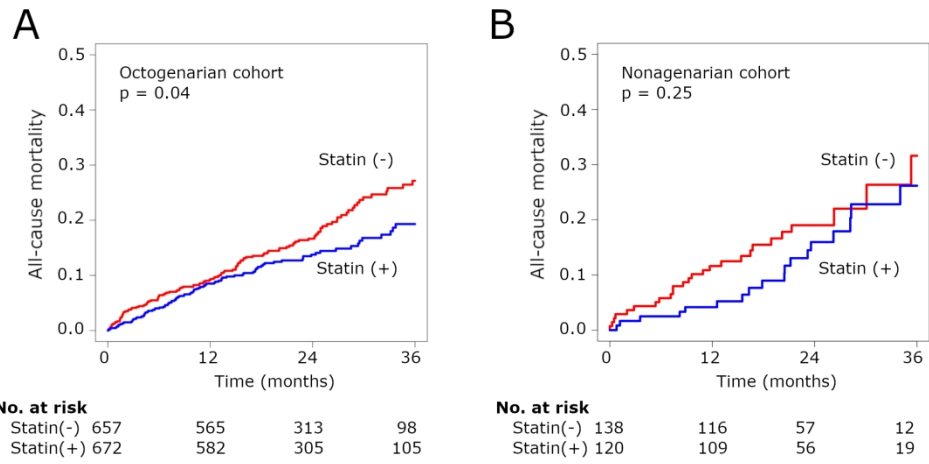

Kaplan-Meier curves for all-cause mortality in the octogenarian and nonagenarian cohort.

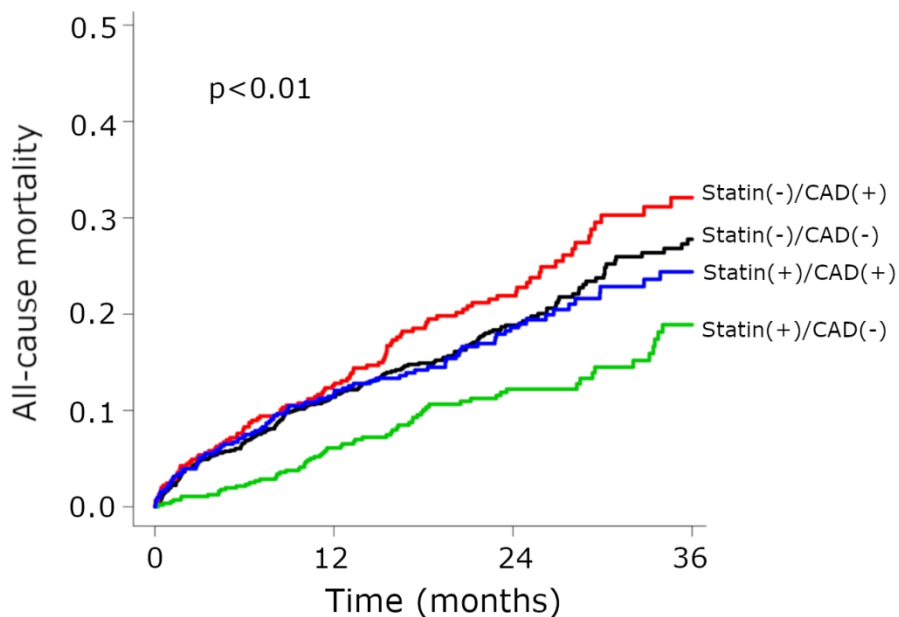

| <b>No. at risk</b> |      |     |     |     |
|--------------------|------|-----|-----|-----|
| Statin(-)/CAD(+)   | 447  | 368 | 201 | 59  |
| Statin(-)/CAD(-)   | 1076 | 895 | 456 | 142 |
| Statin(+)/CAD(+)   | 507  | 428 | 231 | 87  |
| Statin(+)/CAD(-)   | 558  | 497 | 256 | 93  |

Kaplan-Meier curve for all-cause mortality according to previous coronary artery disease and statin therapy in the overall cohort.

1  
2  
3  
4  
5  
6  
7  
8  
9  
10  
11  
12  
13  
14  
15  
16  
17  
18  
19  
20  
21  
22  
23  
24  
25  
26  
27  
28  
29  
30  
31  
32  
33  
34  
35  
36  
37  
38  
39  
40  
41  
42  
43  
44  
45  
46  
47  
48  
49  
50  
51  
52  
53  
54  
55  
56  
57  
58  
59  
60

**Supplementary material online**

**Supplementary Figure S1**

Distribution of propensity scores between statin and non-statin groups in the overall cohort.

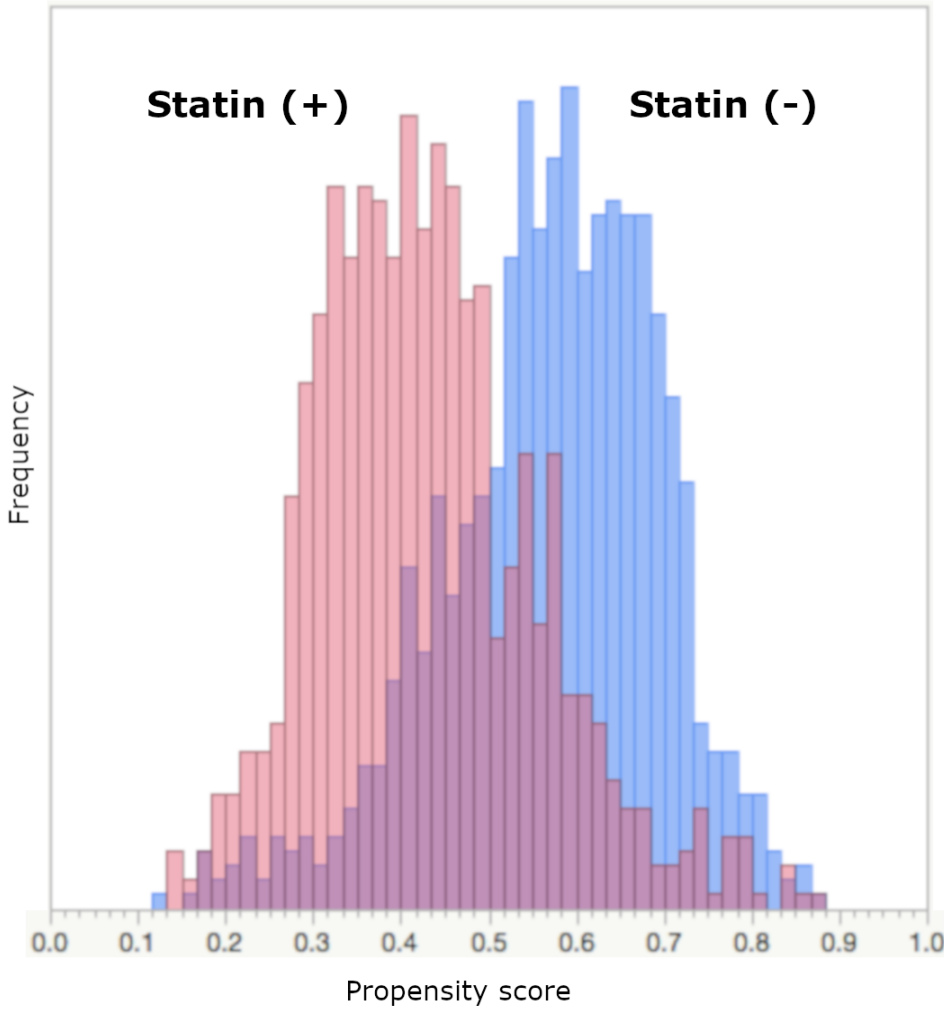

### Supplementary Table S1

Patient characteristics of the propensity score matched and unmatched groups

|                                      | Unmatched                       |                        | <i>P</i> -value |
|--------------------------------------|---------------------------------|------------------------|-----------------|
|                                      | Matched group<br><i>n</i> =1872 | group<br><i>n</i> =716 |                 |
| Preprocedural variables              |                                 |                        |                 |
| Age, years                           | 84.2±5.1                        | 84.6±5.4               | 0.08            |
| Male, <i>n</i> (%)                   | 532 (28.4%)                     | 263 (36.7%)            | <0.01           |
| Body surface area, m <sup>2</sup>    | 1.43±0.17                       | 1.42±0.17              | 0.16            |
| NYHA class 3 or 4, <i>n</i> (%)      | 919 (49.1%)                     | 402 (56.2%)            | <0.01           |
| Clinical Frailty Scale               | 3.8±1.2                         | 4.2±1.4                | <0.01           |
| Smoking, <i>n</i> (%)                | 364 (19.4%)                     | 160 (22.4%)            | 0.10            |
| Diabetes mellitus, <i>n</i> (%)      | 402 (21.5%)                     | 153 (21.4%)            | 0.95            |
| Hypertension, <i>n</i> (%)           | 1497 (80.0%)                    | 493 (68.9%)            | <0.01           |
| Chronic kidney disease, <i>n</i> (%) | 1291 (69.0%)                    | 518 (72.4%)            | 0.09            |
| Atrial fibrillation, <i>n</i> (%)    | 364 (19.4%)                     | 185 (25.8%)            | <0.01           |

|                                                              |              |             |       |
|--------------------------------------------------------------|--------------|-------------|-------|
| Coronary artery disease, <i>n</i> (%)                        | 750 (40.1%)  | 204 (28.5%) | <0.01 |
| Previous myocardial infarction, <i>n</i> (%)                 | 96 (5.1%)    | 62 (8.7%)   | <0.01 |
| Previous percutaneous coronary intervention,<br><i>n</i> (%) | 487 (26.0%)  | 139 (19.4%) | <0.01 |
| Previous coronary artery bypass grafting, <i>n</i><br>(%)    | 117 (6.3%)   | 52 (7.3%)   | 0.36  |
| Peripheral artery disease, <i>n</i> (%)                      | 264 (14.1%)  | 113 (15.8%) | 0.28  |
| Previous stroke, <i>n</i> (%)                                | 9 (0.5%)     | 3 (0.4%)    | 0.98  |
| STS risk score                                               | 7.7±5.7      | 9.8±9.2     | <0.01 |
| Renin-angiotensin inhibitor, <i>n</i> (%)                    | 1084 (57.9%) | 303 (42.3%) | <0.01 |
| Beta blocker, <i>n</i> (%)                                   | 637 (34.0%)  | 243 (33.9%) | 0.97  |
| eGFR, mL/min/1.73 m <sup>2</sup>                             | 52.0±19.1    | 49.7±20.1   | <0.01 |
| Haemoglobin, g/dL                                            | 11.3±1.6     | 11.2±1.7    | 0.16  |
| Procedural variables                                         |              |             |       |
| Transfemoral approach, <i>n</i> (%)                          | 1554 (83.0%) | 613 (85.6%) | 0.11  |



|                                 |              |             |      |
|---------------------------------|--------------|-------------|------|
| Local anaesthesia, <i>n</i> (%) | 1448 (77.4%) | 530 (74.0%) | 0.08 |
| Contrast volume, mL             | 116.1±58.6   | 114.1±58.2  | 0.43 |
| Fluoroscopy time, min           | 21.4±11.4    | 21.2±10.5   | 0.66 |
| Procedure time, min             | 81.0±43.3    | 80.3±50.9   | 0.72 |

CT, computed tomography; eGFR, estimated glomerular filtration rate; NYHA, New York Heart Association; STS, Society of Thoracic Surgeons.

1  
2  
3 **Supplementary Table S2**  
4

5 In-hospital outcomes of the propensity score-matched and -unmatched groups  
6  
7

|                                     | <b>Matched group</b> | <b>Unmatched group</b> | <b>P-value</b> |
|-------------------------------------|----------------------|------------------------|----------------|
|                                     | <b>n=1872</b>        | <b>n=716</b>           |                |
| All-cause mortality, <i>n</i> (%)   | 43 (2.3%)            | 27 (3.8%)              | <0.01          |
| Acute kidney injury, <i>n</i> (%)   | 201 (10.7%)          | 88 (12.3%)             | 0.27           |
| Bleeding, <i>n</i> (%)              | 421 (22.5%)          | 199 (27.8%)            | <0.01          |
| Stroke, <i>n</i> (%)                | 43 (2.3%)            | 18 (2.5%)              | 0.75           |
| Vascular complication, <i>n</i> (%) | 168 (9.0%)           | 65 (9.1%)              | 0.93           |

**STROBE 2007 (v4) Statement—Checklist of items that should be included in reports of *cohort studies***

| Section/Topic                | Item # | Recommendation                                                                                                                                                                       | Reported on page # |
|------------------------------|--------|--------------------------------------------------------------------------------------------------------------------------------------------------------------------------------------|--------------------|
| <b>Title and abstract</b>    | 1      | (a) Indicate the study's design with a commonly used term in the title or the abstract                                                                                               | 3                  |
|                              |        | (b) Provide in the abstract an informative and balanced summary of what was done and what was found                                                                                  | 3                  |
| <b>Introduction</b>          |        |                                                                                                                                                                                      |                    |
| Background/rationale         | 2      | Explain the scientific background and rationale for the investigation being reported                                                                                                 | 5                  |
| Objectives                   | 3      | State specific objectives, including any prespecified hypotheses                                                                                                                     | 5                  |
| <b>Methods</b>               |        |                                                                                                                                                                                      |                    |
| Study design                 | 4      | Present key elements of study design early in the paper                                                                                                                              | 4-6                |
| Setting                      | 5      | Describe the setting, locations, and relevant dates, including periods of recruitment, exposure, follow-up, and data collection                                                      | 4-6                |
| Participants                 | 6      | (a) Give the eligibility criteria, and the sources and methods of selection of participants. Describe methods of follow-up                                                           | 4-6                |
|                              |        | (b) For matched studies, give matching criteria and number of exposed and unexposed                                                                                                  | 6                  |
| Variables                    | 7      | Clearly define all outcomes, exposures, predictors, potential confounders, and effect modifiers. Give diagnostic criteria, if applicable                                             | 5-6                |
| Data sources/<br>measurement | 8*     | For each variable of interest, give sources of data and details of methods of assessment (measurement). Describe comparability of assessment methods if there is more than one group | 5-6                |
| Bias                         | 9      | Describe any efforts to address potential sources of bias                                                                                                                            | 6                  |
| Study size                   | 10     | Explain how the study size was arrived at                                                                                                                                            | 4-5                |
| Quantitative variables       | 11     | Explain how quantitative variables were handled in the analyses. If applicable, describe which groupings were chosen and why                                                         | 5-6                |
| Statistical methods          | 12     | (a) Describe all statistical methods, including those used to control for confounding                                                                                                | 6                  |
|                              |        | (b) Describe any methods used to examine subgroups and interactions                                                                                                                  | 6                  |
|                              |        | (c) Explain how missing data were addressed                                                                                                                                          | NA                 |
|                              |        | (d) If applicable, explain how loss to follow-up was addressed                                                                                                                       | NA                 |
|                              |        | (e) Describe any sensitivity analyses                                                                                                                                                | NA                 |
| <b>Results</b>               |        |                                                                                                                                                                                      |                    |

|                          |     |                                                                                                                                                                                                              |           |
|--------------------------|-----|--------------------------------------------------------------------------------------------------------------------------------------------------------------------------------------------------------------|-----------|
| Participants             | 13* | (a) Report numbers of individuals at each stage of study—eg numbers potentially eligible, examined for eligibility, confirmed eligible, included in the study, completing follow-up, and analysed            | Figure2-4 |
|                          |     | (b) Give reasons for non-participation at each stage                                                                                                                                                         | NA        |
|                          |     | (c) Consider use of a flow diagram                                                                                                                                                                           | Figure1   |
| Descriptive data         | 14* | (a) Give characteristics of study participants (eg demographic, clinical, social) and information on exposures and potential confounders                                                                     | 12        |
|                          |     | (b) Indicate number of participants with missing data for each variable of interest                                                                                                                          | NA        |
|                          |     | (c) Summarise follow-up time (eg, average and total amount)                                                                                                                                                  | 9         |
| Outcome data             | 15* | Report numbers of outcome events or summary measures over time                                                                                                                                               | 9         |
| Main results             | 16  | (a) Give unadjusted estimates and, if applicable, confounder-adjusted estimates and their precision (eg, 95% confidence interval). Make clear which confounders were adjusted for and why they were included | 9         |
|                          |     | (b) Report category boundaries when continuous variables were categorized                                                                                                                                    | NA        |
|                          |     | (c) If relevant, consider translating estimates of relative risk into absolute risk for a meaningful time period                                                                                             | NA        |
| Other analyses           | 17  | Report other analyses done—eg analyses of subgroups and interactions, and sensitivity analyses                                                                                                               | 9-10      |
| <b>Discussion</b>        |     |                                                                                                                                                                                                              |           |
| Key results              | 18  | Summarise key results with reference to study objectives                                                                                                                                                     | 10        |
| <b>Limitations</b>       |     |                                                                                                                                                                                                              |           |
| Interpretation           | 20  | Give a cautious overall interpretation of results considering objectives, limitations, multiplicity of analyses, results from similar studies, and other relevant evidence                                   | 12        |
| Generalisability         | 21  | Discuss the generalisability (external validity) of the study results                                                                                                                                        | 12        |
| <b>Other information</b> |     |                                                                                                                                                                                                              |           |
| Funding                  | 22  | Give the source of funding and the role of the funders for the present study and, if applicable, for the original study on which the present article is based                                                | 13        |

\*Give information separately for cases and controls in case-control studies and, if applicable, for exposed and unexposed groups in cohort and cross-sectional studies.

**Note:** An Explanation and Elaboration article discusses each checklist item and gives methodological background and published examples of transparent reporting. The STROBE checklist is best used in conjunction with this article (freely available on the Web sites of PLoS Medicine at <http://www.plosmedicine.org/>, Annals of Internal Medicine at <http://www.annals.org/>, and Epidemiology at <http://www.epidem.com/>). Information on the STROBE Initiative is available at [www.strobe-statement.org](http://www.strobe-statement.org).

# BMJ Open

## Statin therapy for patients with aortic stenosis who underwent transcatheter aortic valve implantation: a report from a Japanese multicentre registry

|                                 |                                                                                                                                                                                                                                                                                                                                                                                                                                                                                                                                                                                                                                                                                                                                                                                                                                                                                                                                                      |
|---------------------------------|------------------------------------------------------------------------------------------------------------------------------------------------------------------------------------------------------------------------------------------------------------------------------------------------------------------------------------------------------------------------------------------------------------------------------------------------------------------------------------------------------------------------------------------------------------------------------------------------------------------------------------------------------------------------------------------------------------------------------------------------------------------------------------------------------------------------------------------------------------------------------------------------------------------------------------------------------|
| Journal:                        | <i>BMJ Open</i>                                                                                                                                                                                                                                                                                                                                                                                                                                                                                                                                                                                                                                                                                                                                                                                                                                                                                                                                      |
| Manuscript ID                   | bmjopen-2020-044319.R2                                                                                                                                                                                                                                                                                                                                                                                                                                                                                                                                                                                                                                                                                                                                                                                                                                                                                                                               |
| Article Type:                   | Original research                                                                                                                                                                                                                                                                                                                                                                                                                                                                                                                                                                                                                                                                                                                                                                                                                                                                                                                                    |
| Date Submitted by the Author:   | 26-Apr-2021                                                                                                                                                                                                                                                                                                                                                                                                                                                                                                                                                                                                                                                                                                                                                                                                                                                                                                                                          |
| Complete List of Authors:       | Yashima, Fumiaki; Saiseikai Utsunomiya Hospital; Keio University Hospital<br>Hara, Masahiko; Shimane University<br>Inohara, Taku; Vancouver General Hospital<br>Jinzaki, Masahiro ; Keio University Hospital<br>Shimizu, Hideyuki; Keio University Hospital<br>Fukuda, Keiichi; Keio University Hospital<br>Tanaka, Makoto; Keio University Hospital<br>Yamamoto, Masanori; Toyohashi Heart Center<br>Watanabe, Yusuke; Teikyo Daigaku<br>Naganuma, Toru; Shintokyo Byoin<br>Shirai, Shinichi; Kokura Kinen Byoin<br>Yamawaki, Masahiro; Saiseikai Yokohamashi Tobu Hospital<br>Tada, Norio; Sendai Kosei Byoin<br>Yamanaka, Futoshi; Shonan Kamakura General Hospital<br>Mizutani, Kazuki; Osaka City General Hospital<br>Ueno, Hiroshi; Toyama Daigaku Igakubu Daigakuin Igaku Yakugaku Kyoikubu,<br>Tabata, Minoru; Tokyo Bay Urayasu Ichikawa Iryo Center<br>Takagi, Kensuke; Ogaki Shimin Byoin<br>Hayashida, Kentaro; Keio University Hospital |
| <b>Primary Subject Heading</b>: | Cardiovascular medicine                                                                                                                                                                                                                                                                                                                                                                                                                                                                                                                                                                                                                                                                                                                                                                                                                                                                                                                              |
| Secondary Subject Heading:      | Medical management                                                                                                                                                                                                                                                                                                                                                                                                                                                                                                                                                                                                                                                                                                                                                                                                                                                                                                                                   |
| Keywords:                       | Cardiology < INTERNAL MEDICINE, Adult cardiology < CARDIOLOGY, Valvular heart disease < CARDIOLOGY, Coronary heart disease < CARDIOLOGY                                                                                                                                                                                                                                                                                                                                                                                                                                                                                                                                                                                                                                                                                                                                                                                                              |
|                                 |                                                                                                                                                                                                                                                                                                                                                                                                                                                                                                                                                                                                                                                                                                                                                                                                                                                                                                                                                      |

SCHOLARONE™  
Manuscripts



I, the Submitting Author has the right to grant and does grant on behalf of all authors of the Work (as defined in the below author licence), an exclusive licence and/or a non-exclusive licence for contributions from authors who are: i) UK Crown employees; ii) where BMJ has agreed a CC-BY licence shall apply, and/or iii) in accordance with the terms applicable for US Federal Government officers or employees acting as part of their official duties; on a worldwide, perpetual, irrevocable, royalty-free basis to BMJ Publishing Group Ltd ("BMJ") its licensees and where the relevant Journal is co-owned by BMJ to the co-owners of the Journal, to publish the Work in this journal and any other BMJ products and to exploit all rights, as set out in our [licence](#).

The Submitting Author accepts and understands that any supply made under these terms is made by BMJ to the Submitting Author unless you are acting as an employee on behalf of your employer or a postgraduate student of an affiliated institution which is paying any applicable article publishing charge ("APC") for Open Access articles. Where the Submitting Author wishes to make the Work available on an Open Access basis (and intends to pay the relevant APC), the terms of reuse of such Open Access shall be governed by a Creative Commons licence – details of these licences and which [Creative Commons](#) licence will apply to this Work are set out in our licence referred to above.

Other than as permitted in any relevant BMJ Author's Self Archiving Policies, I confirm this Work has not been accepted for publication elsewhere, is not being considered for publication elsewhere and does not duplicate material already published. I confirm all authors consent to publication of this Work and authorise the granting of this licence.

1  
2  
3 **Statin therapy for patients with aortic stenosis who underwent transcatheter aortic**  
4 **valve implantation: a report from a Japanese multicentre registry**  
5  
6  
7  
8  
9

10 **Short title:** Statin therapy for TAVI patients  
11  
12  
13

14 Fumiaki Yashima, MD, PhD<sup>1,2,\*</sup>; Masahiko Hara, MD, PhD<sup>3</sup>; Taku Inohara, MD, PhD<sup>2,4</sup>;  
15 Masahiro Jinzaki, MD, PhD<sup>5</sup>; Hideyuki Shimizu, MD, PhD<sup>6</sup>; Keiichi Fukuda, MD, PhD,  
16 FACC, FESC<sup>2</sup>; Makoto Tanaka, MD<sup>2</sup>; Masanori Yamamoto, MD, PhD, FESC<sup>7,8</sup>; Yusuke  
17 Watanabe, MD<sup>9</sup>; Toru Naganuma, MD, FACC, FESC<sup>10</sup>; Shinichi Shirai, MD<sup>11</sup>; Masahiro  
18 Yamawaki, MD<sup>12</sup>; Norio Tada, MD<sup>13</sup>; Futoshi Yamanaka, MD<sup>14</sup>; Kazuki Mizutani, MD<sup>15</sup>;  
19 Hiroshi Ueno, MD<sup>16</sup>; Minoru Tabata, MD<sup>17</sup>; Kensuke Takagi, MD<sup>18</sup>; Kentaro Hayashida,  
20 MD, PhD, FESC, FACC, FJCS<sup>2</sup> on behalf of the OCEAN-TAVI registry  
21  
22  
23  
24  
25  
26  
27  
28  
29  
30  
31  
32

33 <sup>1</sup>Department of Cardiology, Saiseikai Utsunomiya Hospital, Utsunomiya, Japan  
34

35 <sup>2</sup>Department of Cardiology, Keio University School of Medicine, Tokyo, Japan  
36

37 <sup>3</sup>Center for Community-based Healthcare Research and Education, Shimane University,  
38 Izumo, Japan  
39  
40

41 <sup>4</sup>Division of Cardiology, Vancouver General Hospital, Vancouver, Canada  
42

43 <sup>5</sup>Department of Diagnostic Radiology, Keio University School of Medicine, Tokyo, Japan  
44

45 <sup>6</sup>Department of Cardiovascular Surgery, Keio University School of Medicine, Tokyo, Japan  
46  
47

48 <sup>7</sup>Department of Cardiology, Toyohashi Heart Centre, Toyohashi, Japan  
49

50 <sup>8</sup>Department of Cardiology, Nagoya Heart Centre, Aichi, Japan  
51

52 <sup>9</sup>Department of Cardiology, Teikyo University School of Medicine, Tokyo, Japan  
53

54 <sup>10</sup>Department of Cardiology, New Tokyo Hospital, Matsudo, Japan  
55

56 <sup>11</sup>Department of Cardiology, Kokura Memorial Hospital, Kitakyushu, Japan  
57  
58  
59  
60

1  
2  
3 <sup>12</sup>Department of Cardiology, Saiseikai Yokohama-City Eastern Hospital, Yokohama, Japan  
4

5 <sup>13</sup>Department of Cardiology, Sendai Kousei Hospital, Sendai, Japan  
6

7 <sup>14</sup>Department of Cardiology, Shonan Kamakura General Hospital, Kamakura, Japan  
8

9 <sup>15</sup>Department of Cardiology, Osaka City General Hospital, Osaka, Japan  
10

11 <sup>16</sup>Department of Cardiology, Toyama University Hospital, Toyama, Japan  
12

13 <sup>17</sup>Department of Cardiovascular Surgery, Tokyo Bay Urayasu Ichikawa Medical Center,  
14

15 Urayasu, Japan  
16

17 <sup>18</sup>Department of Cardiology, Ogaki Municipal Hospital, Ogaki, Japan  
18

19  
20  
21  
22  
23  
24 **\*Corresponding author**

25  
26 Fumiaki Yashima, MD, PhD  
27

28 Department of Cardiology, Saiseikai Utsunomiya Hospital,  
29

30 911-1 Takebayashi-cho, Utsunomiya, Tochigi, 321-0974, Japan  
31

32 Phone: 81-28-626-5500; Fax: 81-28-626-5573  
33

34 Email: yashima.fumiaki@gmail.com  
35  
36  
37  
38  
39

40 **Word count: 3087**  
41  
42  
43  
44  
45  
46  
47  
48  
49  
50  
51  
52  
53  
54  
55  
56  
57  
58  
59  
60



## Abstract

**Objectives** Data on statin for patients with aortic stenosis (AS) who underwent transcatheter aortic valve implantation (TAVI) are limited. The present study aimed to evaluate the impact of statin on mid-term mortality of TAVI patients.

**Design** Observational study.

**Setting** This study included AS patients who underwent TAVI from a Japanese multicentre registry.

**Participants** The overall cohort included 2588 patients (84.4±5.2 years); the majority were women (69.3%). The Society of Thoracic Surgeons risk score was 6.55% (interquartile range [IQR] 4.55-9.50%), Euro II score was 3.74% (IQR 2.34-6.02%), and Clinical Frailty Scale was 3.9±1.2.

**Interventions** We classified the patients based on statin at admission and identified 936 matched pairs after propensity score matching.

**Primary and secondary outcome measures** The outcomes were all-cause and cardiovascular mortality.

**Results** The median follow-up was 660 days. Statin at admission was associated with a significant reduction in all-cause mortality (adjusted hazard ratio [aHR] 0.76, 95% confidence interval [CI] 0.58–0.99,  $P=0.04$ ) and cardiovascular mortality (aHR 0.64, 95% CI 0.42–0.97,  $P=0.04$ ). In the octogenarians, statin was associated with significantly lower all-cause mortality (aHR 0.87, 95% CI 0.75-0.99,  $P=0.04$ ); however, the impact in the nonagenarians appeared to be lower (aHR 0.84, 95% CI 0.62-1.13,  $P=0.25$ ). Comparing four groups according to previous coronary artery disease (CAD) and statin, there was a significant difference in all-cause mortality and patients who did not receive statin despite previous CAD showed the worst prognosis (aHR 1.33, 95% CI 1.12-1.57 [patients who received statin without previous CAD as a reference],  $P<0.01$ ).

1  
2  
3 **Conclusions** Statin for TAVI patients will be beneficial even in octogenarians, but the  
4  
5 benefits may disappear in nonagenarians. In addition, statin will be essential for TAVI  
6  
7 patients with CAD. Further researches are warranted to confirm and generalise our findings,  
8  
9 since this study has inherent limitations of the observational study and included only Japanese  
10  
11 patients.  
12  
13

14  
15  
16  
17 **Keywords:** coronary artery disease, elderly, propensity score matching, statin, transcatheter  
18  
19 aortic valve implantation  
20  
21  
22  
23  
24

### 25 **Strengths and limitations of this study**

- 26  
27 ● The present study includes the largest number of patients with aortic stenosis who  
28  
29 underwent transcatheter aortic valve implantation (TAVI), assessing the impact of statin  
30  
31 therapy on mid-term all-cause and cardiovascular mortality.  
32  
33
- 34 ● This was the first study to investigate a difference in the statin effect among  
35  
36 octogenarians and nonagenarians, and to evaluate how the impact of statin therapy  
37  
38 differed according to the underlying coronary artery disease.  
39  
40
- 41 ● All-cause and cardiovascular mortality were analysed using propensity score matching  
42  
43 and the Cox proportional hazards regression model.  
44  
45
- 46 ● Unknown and unmeasurable factors may have confounded the relationship between  
47  
48 statin therapy at admission and mortality due to the nature of an observational study.  
49  
50
- 51 ● We could not assess intolerance in patients eligible for statin treatment but who could not  
52  
53 continue treatment due to statin side effects.  
54  
55  
56  
57  
58  
59  
60

## INTRODUCTION

Transcatheter aortic valve implantation (TAVI) is an established treatment for severe aortic stenosis (AS).[1, 2, 3, 4] However, long-term survival after TAVI is not satisfactory, as shown in a meta-analysis including 31 studies; 5-year and 7-year survival rates were 48% and 28%, respectively.[5] TAVI patients are very elderly and have many cardiovascular comorbidities such as coronary artery disease (CAD), stroke, and peripheral artery disease (PAD).[1, 2, 6] Therefore, adjunctive optimal medical therapy is required to improve prognosis after TAVI. Statin therapy is expected to reduce cardiovascular risk and mortality in patients who have undergone TAVI; however, data on statin therapy for TAVI patients are limited. A report from the Placement of Aortic Transcatheter Valve II (PARTNER II) and Sapien 3 clinical trials or associated registries showed that statin therapy was associated with a lower 2-year mortality rate compared to patients not on statin therapy.[7] However, the study did not demonstrate any differences in the statin effect among octogenarians and nonagenarians, and did not evaluate whether the impact of statin therapy would differ according to the underlying CAD. Therefore, the present study aimed to evaluate the impact of statin therapy on mid-term mortality of TAVI patients and its association with age or the underlying CAD, using our Japanese multicentre registry data.

## METHODS

### Study population and design

All patients with severe AS who underwent TAVI at 14 Japanese centres (Keio University Hospital, Teikyo University Hospital, Toyohashi Heart Centre, Nagoya Heart Centre, New Tokyo Hospital, Kokura Memorial Hospital, Saiseikai Yokohama City Eastern Hospital, Sendai Kosei Hospital, Shonan Kamakura General Hospital, Osaka City University Graduate School of Medicine, Kishiwada Tokushukai Hospital, Toyama University Hospital, Tokyo

1  
2  
3 Bay Urayasu Ichikawa Medical Center, and Ogaki municipal hospital) between 2013 and  
4  
5 2017 were prospectively included in our TAVI registry (Optimized Catheter valvular  
6  
7 intervention [OCEAN-TAVI] registry).[8, 9, 10] Informed consent was obtained from all  
8  
9 patients, and the institutional review boards of all 14 participating centres approved this study.  
10  
11 Additionally, this study was conducted in accordance with the ethical guidelines of the 1975  
12  
13 Declaration of Helsinki. The OCEAN-TAVI registry was registered with the University  
14  
15 Hospital Medical Information Network Clinical Trial Registry and accepted by the  
16  
17 International Committee of Medical Journal Editors (UMIN-ID: 000020423).  
18  
19  
20

21 Patients received transcatheter heart valves (THVs) via either the transfemoral,  
22  
23 transapical, or transaortic approach. Sapien XT valves, Sapien 3 valves (Edwards  
24  
25 Lifesciences, Irvine, CA), CoreValves, Evolut R (Medtronic, Minneapolis, MN) were used as  
26  
27 THVs. A total of 2588 patients were treated with TAVI between 2013 and 2017. They were  
28  
29 categorised into two groups according to statin administration at admission for TAVI  
30  
31 procedures (Figure 1). We set the primary endpoint as mid-term all-cause mortality for up to 3  
32  
33 years. Secondary endpoints included mid-term cardiovascular mortality, mid-term non-  
34  
35 cardiovascular mortality up to 3 years, and 30-day all-cause mortality.  
36  
37  
38  
39

40 We performed propensity score (PS) matching, as described below, and compared the  
41  
42 endpoints between the two groups in the matched cohort. In addition, we categorised the  
43  
44 matched cohort into two cohorts; an octogenarian cohort (80–89 years old) and a  
45  
46 nonagenarian cohort (90 years or older), and investigated the differences by age in the impact  
47  
48 of statin on mid-term all-cause mortality. Furthermore, we classified the overall cohort into  
49  
50 four groups according to a history of CAD and statin treatment at admission and evaluated  
51  
52 whether the impact of statin differed according to the underlying CAD condition. We also  
53  
54 explored predictors of mid-term all-cause mortality in the overall cohort using multivariate  
55  
56 analysis.  
57  
58  
59  
60

1  
2  
3 Clinical outcomes including all-cause mortality and cardiovascular mortality were  
4 defined according to the Valve Academic Research Consortium-2 consensus document.[11]  
5

### 6 7 **Statistical analysis**

8  
9 Continuous variables are expressed as mean±standard deviation (SD), and categorical  
10 variables are expressed as percentages. Continuous variables were compared using the  
11 Wilcoxon rank-sum test. The chi-squared test was used to compare categorical variables.  
12  
13 Survival curves up to 3 years were presented as Kaplan-Meier curves, and the log-rank test  
14 was used for comparison of the statin and non-statin groups. The Cox proportional hazards  
15 regression analyses were performed to identify independent correlates for mid-term all-cause  
16 mortality.  
17

18  
19 PS matching[12, 13] was used to account for differences in baseline characteristics. The  
20 PS was calculated for each patient using a logistic regression model to predict stratification  
21 into the statin group based on the following variables: age; sex; body surface area; smoking;  
22 diabetes; hypertension; previous history of CAD, myocardial infarction (MI), percutaneous  
23 coronary intervention, coronary artery bypass grafting, stroke, PAD; atrial fibrillation;  
24 estimated glomerular filtration rate; haemoglobin level; renin-angiotensin inhibitor treatment  
25 at admission; New York Heart Association (NYHA) class 3 or 4; Clinical Frailty Scale[8];  
26 and Society of Thoracic Surgeons (STS) risk score. PS matching was performed using 1:1  
27 matching without replacement, with the calliper width equal to 0.2 SD of the PS logit. The  
28 balance between the statin and non-statin groups in the matched cohort was estimated using  
29 absolute standardised difference. The Cox proportional hazards analyses were performed to  
30 assess the impact of statin on the clinical outcomes. In addition to the PS matching model, we  
31 built a multivariable model by inverse probability of treatment weighting (IPTW) using the  
32 PS.[14] All reported *P*-values were two-sided, and a *P*-value <0.05 was considered  
33  
34  
35  
36  
37  
38  
39  
40  
41  
42  
43  
44  
45  
46  
47  
48  
49  
50  
51  
52  
53  
54  
55  
56  
57  
58  
59  
60

1  
2  
3 statistically significant. All statistical analyses were performed using the R software package  
4  
5 (version 3.3.2; R Development Core Team, Vienna, Austria).  
6  
7  
8  
9

## 10 11 **Patient and Public Involvement statement**

12  
13  
14 Patients were first involved in the research when they underwent TAVI and registered to the  
15  
16 OCEAN-TAVI registry through the web-based data collection system. Research questions  
17  
18 and outcome measures were developed by the OCEAN-TAVI registry investigators. Patients  
19  
20 were informed about the registration. They were asked to assess the burden of the intervention  
21  
22 and time required to participate in the research. Information of the registry and the study  
23  
24 results are available on the website of the OCEAN-TAVI registry.  
25  
26  
27  
28  
29  
30

## 31 32 **RESULTS**

33  
34 Among the 2588 patients who underwent TAVI, 1523 and 1065 patients were classified into  
35  
36 the statin and the non-statin group, respectively (Figure 1). The distribution of PS in the statin  
37  
38 and non-statin groups is shown in Supplementary material online, Figure S1. After 1:1 PS  
39  
40 matching, we identified 936 matched pairs of patients with similar PS. The patient  
41  
42 characteristics of the statin and non-statin groups before and after matching are summarised in  
43  
44 Table 1. The overall cohort included very elderly patients (84.4±5.2 years). The majority of  
45  
46 the cohort was female (69.3%). The Society of Thoracic Surgeons risk score was 6.55%  
47  
48 (interquartile range [IQR] 4.55-9.50%), Euro II score was 3.74% (IQR 2.34-6.02%), and  
49  
50 Clinical Frailty Scale was 3.9±1.2.  
51  
52  
53

54  
55 After PS matching, the two groups were well-balanced in terms of pre-procedural patient  
56  
57 characteristics and procedural variables. In-hospital all-cause mortality, acute kidney injury,  
58  
59 stroke, and vascular complications did not differ between the two groups. Post-procedural  
60

1  
2  
3 echocardiography data showed no significant differences between the two groups (Table 2).  
4  
5 The patient characteristics and in-hospital outcomes of the PS matched and unmatched groups  
6  
7 are summarised in Supplementary material online, Tables S1 and S2. There were several  
8  
9 differences between the two groups. The proportion of male patients was lower in the PS  
10  
11 matched group than in the unmatched group (532 [28.4%] vs. 263 [36.7%],  $P<0.01$ ), NYHA  
12  
13 Class 3 or 4 was less frequent in the matched group (919 [49.1%] vs. 402 [56.2%],  $P<0.01$ ),  
14  
15 the Clinical Frailty Scale was lower in the matched group ( $3.8\pm 1.2$  vs.  $4.2\pm 1.4$ ,  $P<0.01$ ), and  
16  
17 the STS risk score was lower in the matched group ( $7.7\pm 5.7$  vs  $9.8\pm 9.2$ ,  $P<0.01$ ). History of  
18  
19 the previous CAD was more frequent (750 [40.1%] vs. 204 [28.5%],  $P<0.01$ ), but previous  
20  
21 MI was less frequent (96 [5.1%] vs. 62 [8.7%],  $P<0.01$ ) in the PS matched group. In-hospital  
22  
23 all-cause mortality (43 [2.3%] vs. 27 [3.8%],  $P<0.01$ ) and bleeding (421 [22.5%] vs. 199  
24  
25 [27.8%],  $P<0.01$ ) were lower in the matched group than in the unmatched group.  
26  
27  
28  
29

30  
31 In the overall cohort, the median follow-up period was 660 days. Statin therapy was  
32  
33 associated with significantly lower mid-term all-cause mortality in the PS-matched cohort  
34  
35 (adjusted hazard ratio [aHR] 0.76, 95% confidence interval [CI] 0.58–0.99,  $P=0.04$ ) (Figure  
36  
37 2a), which was consistent with the IPTW model (aHR 0.80, 95% CI 0.65–0.99,  $P=0.04$ ). The  
38  
39 Kaplan-Meier curves relative to the mid-term outcomes additionally showed a significant  
40  
41 difference in cardiovascular mortality (aHR 0.64, 95% CI 0.42–0.97,  $P=0.04$ ) and an  
42  
43 insignificant difference in non-cardiovascular mortality (aHR 0.86, 95% CI 0.61–1.21,  
44  
45  $P=0.39$ ) between the two groups (Figure 2b and 2c). There was no significant difference in  
46  
47 30-day all-cause mortality (aHR 0.73, 95% CI 0.47–1.08,  $P=0.11$ ) and a landmark analysis  
48  
49 after 30 days showed a significant difference in mid-term all-cause mortality (aHR 0.88, 95%  
50  
51 CI 0.78–0.99,  $P=0.03$ ) (Figure 2d).  
52  
53  
54

55  
56 In the octogenarian cohort (80–89 years old), statin therapy was associated with  
57  
58 significantly lower mid-term all-cause mortality (aHR 0.87, 95% CI 0.75–0.99,  $P=0.04$ )  
59  
60

1  
2  
3 (Figure 3a), but the impact in the nonagenarian cohort (90 years or older) appeared to be  
4  
5 lower (aHR 0.84, 95% CI 0.62-1.13,  $P=0.25$ ) (Figure 3b).  $P$  for interaction was 0.90.

7  
8 Furthermore, comparing the four groups according to previous CAD and statin therapy,  
9  
10 there was a significant difference in mid-term all-cause mortality ( $P<0.01$ ) (Figure 4).

11  
12 Patients who did not receive statin therapy despite a history of previous CAD showed the  
13  
14 worst prognosis (aHR 1.33, 95% CI 1.12-1.57 [patients who received statin without previous  
15  
16 CAD as a reference]). Their survival curve diverged from that of the patients without previous  
17  
18 CAD or statin after 1 year. In addition, patients with previous CAD and statin therapy (aHR  
19  
20 1.04, 95% CI 0.87-1.23) seemed to obtain similar risks with those who did not have previous  
21  
22 CAD or statin therapy (aHR 1.11, 95% CI 0.96-1.27 [patients who received statin without  
23  
24 previous CAD as a reference]).  
25  
26  
27

28  
29 The results of the univariate and multivariate Cox proportional hazards regression  
30  
31 analyses were shown in Table 3. Statin therapy at admission was independently associated  
32  
33 with lower all-cause mortality (aHR 0.86, 95% CI 0.77-0.95),  $P<0.01$ ).  
34  
35  
36  
37

## 38 DISCUSSION

39  
40 The present study investigated the impact of statin therapy on mid-term mortality after TAVI  
41  
42 using a Japanese multicentre registry. Statin therapy at admission was associated with  
43  
44 significantly lower all-cause and cardiovascular mortality. It should be noted that the impact  
45  
46 of statin therapy attenuated in the nonagenarians. Furthermore, we demonstrated differences  
47  
48 in all-cause mortality according to the history of previous CAD and statin therapy. The  
49  
50 present study included the largest patient cohort (936 pairs of patients after PS matching) and  
51  
52 the first report to investigate the association of age and a history of previous CAD with the  
53  
54 impact of statin.  
55  
56  
57  
58  
59  
60



1  
2  
3 Few reports have assessed the impact of statin treatment on mortality after TAVI. Peri-  
4  
5 Okonny et al. demonstrated that statin therapy was associated with reductions in 2-year all-  
6  
7 cause (aHR 0.65, 95% CI 0.49–0.87,  $P=0.001$ ), cardiovascular (aHR 0.66, 95% CI 0.46–0.96,  
8  
9  $P=0.030$ ), and non-cardiovascular mortality (aHR 0.64, 95% CI 0.44–0.99,  $P=0.045$ )  
10  
11 compared with no statin therapy, with a large cohort using PARTNER II and Sapien 3 clinical  
12  
13 trials or associated registries (626 pairs of patients after PS matching).[7] Merdler et al.  
14  
15 showed that high-intensity statin therapy was associated with a reduction in mortality after  
16  
17 TAVI (median follow-up period: 2.5 years) using data of 1238 cases from a single-centre  
18  
19 registry (aHR 0.59, 95% CI 0.37–0.96,  $P=0.03$ ).[15] Huded et al. also showed that high-  
20  
21 intensity statin therapy was associated with a reduction in all-cause mortality (mean survival:  
22  
23 3.9 years) based on 294 cases (aHR 0.36, 95% CI 0.14–0.90,  $P=0.029$ ).[16] Takagi et al.  
24  
25 reported similar results following a meta-analysis.[17] These results were consistent with our  
26  
27 results.  
28  
29  
30  
31  
32

33 The mechanism through which statin therapy reduces the risks of all-cause and  
34  
35 cardiovascular mortality is thought to be associated with a reduction in ischaemic events.[7,  
36  
37 15, 16, 17] However, there are limited data relative to statin therapy in octogenarians and  
38  
39 nonagenarians, as are data not only on TAVI but also on statin therapy as primary and  
40  
41 secondary prevention. The PROspective Study of Pravastatin in the Elderly at Risk trial was  
42  
43 the only randomised controlled trial for elderly patients (aged 70–82 years) with a history or  
44  
45 risk factors of vascular disease. The study revealed that pravastatin led to a 3-year reduced  
46  
47 risk of CAD.[18] Recommendation of statin therapy for very elderly patients varies among  
48  
49 the guidelines.[19, 20, 21, 22, 23] Very recently, a few reports supporting statin therapy for  
50  
51 very elderly patients have been published. In the Patient and Provider Assessment of Lipid  
52  
53 Management Registry, statin therapy appeared to be similarly tolerated by patients older and  
54  
55 younger than 75 years.[24] The Cholesterol Treatment Trialists' Collaboration demonstrated  
56  
57  
58  
59  
60

1  
2  
3 that statin therapy as primary and secondary prevention produced significant reductions in  
4 major vascular events even in patients older than 75 years.[25] Furthermore, Romas et al.  
5 revealed that statin therapy was associated with significant reductions in atherosclerotic  
6 cardiovascular events and all-cause mortality for patients who were older than 74 years and  
7 had diabetes.[26] Interestingly, Giral et al. demonstrated that statin discontinuation in 75-  
8 year-old primary prevention patients was associated with a 33% increased risk of  
9 cardiovascular events.[27] Our present study was consistent with these reports and indicated  
10 that statin therapy would be effective for very elderly and atherosclerotic high-risk patients by  
11 reducing cardiovascular events and mortality. Conversely, Romas et al. reported that the  
12 benefits of statin therapy disappeared in nonagenarians,[26] as observed in our nonagenarian  
13 cohort. However, P for interaction among the octogenarian and nonagenarian cohorts in the  
14 present study was not significant. There seemed to be a difference among the two cohorts  
15 during 12-24 months after TAVI but then the curves converged. The insignificance might be  
16 due to low life expectancy in nonagenarians after 24 months. Besides, the sizes of the cohorts  
17 and confounding regarding prescribing statin to nonagenarians with CAD might skew the  
18 results.

19  
20  
21  
22  
23  
24  
25  
26  
27  
28  
29  
30  
31  
32  
33  
34  
35  
36  
37  
38  
39  
40 The statin effect generally appears after 1 year compared with placebo.[7, 28] Patients  
41 with a history of previous CAD who did not receive statin therapy appeared to have higher  
42 mortality rates after 1 year in the present study. In addition, our analysis the combining  
43 history of previous CAD and statin therapy implied that TAVI patients with the previous  
44 CAD might be able to achieve a similar reduction in mortality risk as those patients who had  
45 no previous CAD or statin treatment.

46  
47  
48  
49  
50  
51  
52  
53  
54  
55  
56  
57  
58  
59  
60  
The present study had some limitations. First, this is an observational study, and  
unknown and unmeasurable factors may have confounded the relationship between statin  
therapy and mortality. However, a multicentre approach enabled us to accumulate a relatively

1  
2  
3 large number of patients and we used PS matching analysis, the IPTW model, and the Cox  
4  
5 proportional hazards regression model to confirm the robustness of the results. Second, a  
6  
7 generalisation of the present results may be slightly limited due to the differences between the  
8  
9 matched and unmatched group as it might be plausible given the results of the IPTW model.  
10  
11 In addition, generalising our findings outside Japan also requires attention since this study  
12  
13 included only Japanese patients. Third, information on the type and doses of statin therapy  
14  
15 was not obtained. Usage of ezetimibe or proprotein convertase subtilisin/kexin type 9  
16  
17 inhibitor was not recorded in this study. Fourth, we assessed statin use only on admission and  
18  
19 there was a possibility that statin therapy might have changed at discharge or during follow-  
20  
21 up. The duration of statin administration and the timing to start prescribing statin were not  
22  
23 captured in the present study. Finally, we could not assess intolerance in patients eligible for  
24  
25 statin treatment but who could not continue treatment due to statin side effects such as  
26  
27 rhabdomyolysis. Further studies, including a randomised controlled trial, on statin therapy  
28  
29 following TAVI are warranted to resolve these limitations.  
30  
31  
32  
33  
34

35 In conclusion, using data from the large multicentre registry, statin therapy at admission  
36  
37 of TAVI was associated with significant reductions in mid-term all-cause and cardiovascular  
38  
39 mortality. Statin therapy prior TAVI will be beneficial even in octogenarians, but the benefits  
40  
41 may disappear in nonagenarians. In addition, statin therapy will be essential for TAVI patients  
42  
43 with CAD. Further researches are warranted to confirm and generalise our findings, since the  
44  
45 present study has several inherent limitations of the observational study and included only  
46  
47 Japanese patients.  
48  
49  
50  
51  
52  
53  
54  
55  
56  
57  
58  
59  
60

### **Acknowledgements**

We express our heartfelt gratitude to the team members at our hospital and other hospitals participating in the multicentre registry and the Japan Society of Clinical Research (<http://www.japanscr.org/>) for their dedicated support.

### **Funding**

The OCEAN-TAVI registry is supported by Edwards Lifesciences, Medtronic, Boston Scientific, Abbott Medical, and Daiichi-Sankyo Company. There are no award/grant numbers for the Funders.

### **Conflict of interest**

Drs. Yamamoto, Tada, Naganuma, Shirai, Mizutani, Tabata, Ueno, and Watanabe are clinical proctors for Edwards Lifesciences and Medtronic. Drs. Shimizu, Takagi and Hayashida are clinical proctors of Edwards Lifesciences. Dr. Inohara received a research grant from Boston Scientific. Dr. Kohsaka received lecture fees and research grants from Pfizer Japan, Bayer, Daiichi Sankyo, and Bristol-Myers Squibb. The remaining authors have nothing to disclose.

### **Data availability**

The data underlying this article cannot be shared publicly due to the privacy of individuals that participated in the study. The data will be shared on reasonable request to the corresponding author.

### **Authors' contributions**

Conception or design of the work: Fumiaki Yashima, Shinichi Shirai, Toru Naganuma, Kazuki Mizutani, Masahiro Yamawaki, Minoru Tabata, and Futoshi Yamanaka.

1  
2  
3 Data collection: Makoto Tanaka, Masahiro Jinzaki, Hideyuki Shimizu, and Keiichi Fukuda.  
4

5 Data analysis and interpretation: Masahiko Hara, Taku Inohara, Kensuke Takagi, Hiroshi  
6  
7 Ueno, and Norio Tada.  
8

9  
10 Drafting the article: Fumiaki Yashima and Taku Inohara.  
11

12 Critical revision of the article: Masanori Yamamoto, Yusuke Watanabe, Kentaro Hayashida.  
13

14 Final approval of the version to be published: all authors.  
15  
16  
17  
18

### 19 **Ethics Statement**

20  
21 The OCEAN-TAVI registry was registered with the University Hospital Medical Information  
22  
23 Network Clinical Trial Registry and accepted by the International Committee of Medical  
24  
25 Journal Editors (UMIN-ID: 000020423). The institutional review boards of all the  
26  
27 participating centres approved this study. Informed consent was obtained from all patients.  
28  
29  
30  
31  
32  
33  
34  
35  
36  
37  
38  
39  
40  
41  
42  
43  
44  
45  
46  
47  
48  
49  
50  
51  
52  
53  
54  
55  
56  
57  
58  
59  
60

## References

- 1 Mack MJ, Leon MB, Smith CR, et al. PARTNER 1 trial investigators, 5-year outcomes of  
2 transcatheter aortic valve replacement or surgical aortic valve replacement for high surgical  
3 risk patients with aortic stenosis (PARTNER 1): a randomised controlled trial. *Lancet*  
4 2015;385:2477–84.
- 5  
6  
7  
8  
9  
10  
11  
12  
13  
14  
15  
16  
17  
18  
19  
20  
21  
22  
23  
24  
25  
26  
27  
28  
29  
30  
31  
32  
33  
34  
35  
36  
37  
38  
39  
40  
41  
42  
43  
44  
45  
46  
47  
48  
49  
50  
51  
52  
53  
54  
55  
56  
57  
58  
59  
60
- 2 Kapadia SR, Leon MB, Makkar RR, et al. 5-year outcomes of transcatheter aortic valve  
replacement compared with standard treatment for patients with inoperable aortic stenosis  
(PARTNER 1): a randomised controlled trial. *Lancet* 2015;385:2485–91.
- 3 Popma JJ, Deeb GM, Yakubov SJ et al. Transcatheter aortic-valve replacement with a self-  
expanding valve in low-risk patients. *N Engl J Med* 2019;380:1706–15.
- 4 Mack MJ, Leon MB, Thourani VH, et al. Transcatheter aortic-valve replacement with a  
balloon-expandable valve in low-risk patients. *N Engl J Med* 2019;380:1695–705.
- 5 Chakos A, Wilson-Smith A, Arora S, et al. Long term outcomes of transcatheter aortic  
valve implantation (TAVI): a systematic review of 5-year survival and beyond. *Ann*  
*Cardiothorac Surg* 2017;6:432–43.
- 6 Holmes DR Jr, Brennan JM, Rumsfeld JS, et al. Clinical outcomes at 1 year following  
transcatheter aortic valve replacement. *JAMA* 2015;313:1019–28.
- 7 Peri-Okonny PA, Liu Y, Malaisrie SC, et al. Association of statin use and mortality after  
transcatheter aortic valve replacement. *J Am Heart Assoc* 2019;8:e011529.
- 8 Shimura T, Yamamoto M, Kano S, et al. Impact of the Clinical Frailty Scale on outcomes  
after transcatheter aortic valve replacement. *Circulation* 2017;135:2013–24.
- 9 Yashima F, Yamamoto M, Tanaka M, et al. Transcatheter aortic valve implantation in  
patients with an extremely small native aortic annulus: the OCEAN-TAVI registry. *Int J*  
*Cardiol* 2017;240:126–31.

1  
2  
3 10 Kataoka A, Watanabe Y, Kozuma K, et al. Prognostic impact of low-flow severe aortic  
4 stenosis in small-body patients undergoing TAVR: the OCEAN-TAVI registry. *JACC*  
5  
6 *Cardiovasc Imaging* 2018;11:659–69.  
7

8  
9  
10 11 Kappetein AP, Head SJ, Genereux P, et al. Updated standardized endpoint definitions for  
11  
12 transcatheter aortic valve implantation: the Valve Academic Research Consortium-2  
13  
14 consensus document. *J Am Coll Cardiol* 2012;60:1438–54.  
15

16  
17 12 Rosenbaum PR, Rubin DB. The central role of the propensity score in observational  
18  
19 studies for causal effects. *Biometrika* 1983;70:41–55.  
20

21  
22 13 Weitzen S, Lapane KL, Toledano AY, et al. Principles for modeling propensity scores in  
23  
24 medical research: a systematic literature review. *Pharmacoepidemiol Drug Saf* 2004;13:841–  
25  
26 53.  
27

28  
29 14 Austin PC. The performance of different propensity score methods for estimating marginal  
30  
31 hazard ratios. *Stat Med* 2013;32:2837–49.  
32

33  
34 15 Merdler I, Rozenbaum Z, Finkelstein A, et al. Effect of statin therapy and long-term  
35  
36 mortality following transcatheter aortic valve implantation. *Am J Cardiol* 2019;123:1978–82.  
37

38  
39 16 Huded CP, Benck LR, Stone NJ, et al. Relation of intensity of statin therapy and outcomes  
40  
41 after transcatheter aortic valve replacement. *Am J Cardiol* 2017;119:1832–38.  
42

43  
44 17 Takagi H, Hari Y, Nakashima K, et al. Meta-analysis for impact of statin on mortality after  
45  
46 transcatheter aortic valve implantation. *Am J Cardiol* 2019;124:920–25.  
47

48  
49 18 Shepherd J, Blauw GJ, Murphy MB, et al. Pravastatin in elderly individuals at risk of  
50  
51 vascular disease (PROSPER): a randomised controlled trial. *Lancet* 2002;360:1623–30.  
52

53  
54 19 Mortensen MB, Falk E. Primary prevention with statins in the elderly. *J Am Coll Cardiol*  
55  
56 2018;71:85–94.  
57

58  
59 20 Piepoli MF, Hoes AW, Agewall S, et al. 2016 European Guidelines on cardiovascular  
60  
disease prevention in clinical practice: The Sixth Joint Task Force of the European Society of

1  
2  
3 Cardiology and other societies on cardiovascular disease prevention in clinical practice  
4  
5 (constituted by representatives of 10 societies and by invited experts) developed with the  
6  
7 special contribution of the European Association for Cardiovascular Prevention &  
8  
9 Rehabilitation (EACPR). *Eur Heart J* 2016;37:2315–81.

10  
11  
12 21 Bibbins-Domingo K, Grossman DC, Curry SJ, et al. Statin use for the primary prevention  
13  
14 of cardiovascular disease in adults: US Preventive Services Task Force recommendation  
15  
16 statement. *JAMA* 2016;316:1997–2007.

17  
18  
19 22 Anderson TJ, Gregoire J, Pearson GJ, et al. 2016 Canadian Cardiovascular Society  
20  
21 guidelines for the management of dyslipidemia for the prevention of cardiovascular disease in  
22  
23 the adult. *Can J Cardiol* 2016;32:1263–82.

24  
25  
26 23 National Clinical Guideline Centre. Lipid Modification: Cardiovascular risk assessment  
27  
28 and the modification of blood lipids for the primary and secondary prevention of  
29  
30 cardiovascular disease. London, UK: National Institute for Health and Care Excellence 2014.

31  
32  
33 24 Nanna MG, Navar AM, Wang TY, et al. Statin use and adverse effects among adults >75  
34  
35 years of age: insights from the Patient and Provider Assessment of Lipid Management  
36  
37 (PALM) registry. *J Am Heart Assoc* 2018;7:e008546.

38  
39  
40 25 Cholesterol Treatment Trialists' Collaboration. Efficacy and safety of statin therapy in  
41  
42 older people: a meta-analysis of individual participant data from 28 randomised controlled  
43  
44 trials. *Lancet* 2019;393:407–15.

45  
46  
47 26 Ramos R, Comas-Cufi M, Marti-Lluch R, et al. Statins for primary prevention of  
48  
49 cardiovascular events and mortality in old and very old adults with and without type 2  
50  
51 diabetes: retrospective cohort study. *BMJ* 2018;362:k3359.

52  
53  
54 27 Giral P, Neumann A, Weill A, et al. Cardiovascular effect of discontinuing statins for  
55  
56 primary prevention at the age of 75 years: a nationwide population-based cohort study in  
57  
58 France. *Eur Heart J* 2019;40:3516–25.



1  
2  
3 28 Scandinavian Simvastatin Survival Study Group. Randomised trial of cholesterol lowering  
4 in 4444 patients with coronary heart disease: the Scandinavian Simvastatin Survival Study  
5  
6  
7 (4S). *Lancet* 1994;344:1383–89.  
8  
9  
10  
11  
12  
13  
14  
15  
16  
17  
18  
19  
20  
21  
22  
23  
24  
25  
26  
27  
28  
29  
30  
31  
32  
33  
34  
35  
36  
37  
38  
39  
40  
41  
42  
43  
44  
45  
46  
47  
48  
49  
50  
51  
52  
53  
54  
55  
56  
57  
58  
59  
60

For peer review only

1  
2  
3 **Figure legends**  
4  
5  
6

7  
8 **Figure 1**  
9

10 Flowchart of patient selection for the present study.

11  
12 OCEAN; Optimized CathEter vAlvular iNtervention; TAVI, transcatheter aortic valve  
13  
14 implantation.  
15  
16

17  
18  
19 **Figure 2**  
20

21 Kaplan-Meier curves for mid-term and 30-day mortality in the matched cohort. *a, b, c*:

22  
23 Kaplan-Meier curves for mid-term all-cause mortality (*a*), CV mortality (*b*), and non-CV

24  
25 mortality (*c*) in the matched cohort. *d*: Kaplan-Meier curve for 30-day all-cause mortality and  
26  
27 mid-term all-cause mortality with the landmark analysis from 30 days in the matched cohort.  
28  
29

30 CI, confidence interval; CV, cardiovascular; HR, hazard ratio.  
31  
32

33  
34  
35 **Figure 3**  
36

37 Kaplan-Meier curves for all-cause mortality in the octogenarian and nonagenarian cohort.  
38  
39

40  
41  
42 **Figure 4**  
43

44 Kaplan-Meier curve for all-cause mortality according to previous coronary artery disease and  
45  
46 statin therapy in the overall cohort.  
47  
48

49 CAD, coronary artery disease.  
50  
51  
52  
53  
54  
55  
56  
57  
58  
59  
60

**Table 1**

Patient characteristics before and after propensity score matching

|                                   | Before matching              |                              |                            | After matching              |                             |                            |
|-----------------------------------|------------------------------|------------------------------|----------------------------|-----------------------------|-----------------------------|----------------------------|
|                                   | Statin (+)<br><i>n</i> =1065 | Statin (-)<br><i>n</i> =1523 | Standardised<br>difference | Statin (+)<br><i>n</i> =936 | Statin (-)<br><i>n</i> =936 | Standardised<br>difference |
| Preprocedural variables           |                              |                              |                            |                             |                             |                            |
| Age, years                        | 84.1±5.0                     | 84.6±5.3                     | 0.01                       | 84.2±5.0                    | 84.3±5.2                    | 0.01                       |
| Men, <i>n</i> (%)                 | 322 (30.2%)                  | 473 (31.1%)                  | 0.02                       | 277 (29.6%)                 | 255 (27.2%)                 | 0.05                       |
| Body surface area, m <sup>2</sup> | 1.44±0.17                    | 1.42±0.17                    | 0.13                       | 1.44±0.17                   | 1.43±0.17                   | 0.07                       |

|    |                                              |             |              |      |             |             |       |
|----|----------------------------------------------|-------------|--------------|------|-------------|-------------|-------|
| 1  |                                              |             |              |      |             |             |       |
| 2  |                                              |             |              |      |             |             |       |
| 3  |                                              |             |              |      |             |             |       |
| 4  | NYHA class 3 or 4, <i>n</i> (%)              | 518 (48.6%) | 803 (52.7%)  | 0.08 | 462 (49.4%) | 457 (48.8%) | 0.01  |
| 5  |                                              |             |              |      |             |             |       |
| 6  |                                              |             |              |      |             |             |       |
| 7  |                                              |             |              |      |             |             |       |
| 8  | Clinical Frailty Scale                       | 3.8±1.2     | 4.1±1.3      | 0.23 | 3.8±1.2     | 3.8±1.2     | 0.04  |
| 9  |                                              |             |              |      |             |             |       |
| 10 |                                              |             |              |      |             |             |       |
| 11 | Diabetes mellitus, <i>n</i> (%)              | 264 (24.8%) | 291 (19.1%)  | 0.14 | 207 (22.1%) | 195 (20.8%) | 0.03  |
| 12 |                                              |             |              |      |             |             |       |
| 13 |                                              |             |              |      |             |             |       |
| 14 |                                              |             |              |      |             |             |       |
| 15 | Smoking, <i>n</i> (%)                        | 212 (19.9%) | 260 (17.1%)  | 0.07 | 169 (18.1%) | 160 (17.1%) | 0.02  |
| 16 |                                              |             |              |      |             |             |       |
| 17 |                                              |             |              |      |             |             |       |
| 18 |                                              |             |              |      |             |             |       |
| 19 | Hypertension, <i>n</i> (%)                   | 861 (80.9%) | 1129 (74.1%) | 0.16 | 744 (79.5%) | 753 (80.5%) | 0.02  |
| 20 |                                              |             |              |      |             |             |       |
| 21 |                                              |             |              |      |             |             |       |
| 22 | Chronic kidney disease, <i>n</i> (%)         | 755 (70.9%) | 1054 (69.2%) | 0.04 | 651 (69.6%) | 640 (68.4%) | 0.03  |
| 23 |                                              |             |              |      |             |             |       |
| 24 |                                              |             |              |      |             |             |       |
| 25 |                                              |             |              |      |             |             |       |
| 26 | Atrial fibrillation, <i>n</i> (%)            | 195 (18.3%) | 354 (23.2%)  | 0.12 | 181 (19.3%) | 183 (19.6%) | 0.01  |
| 27 |                                              |             |              |      |             |             |       |
| 28 |                                              |             |              |      |             |             |       |
| 29 |                                              |             |              |      |             |             |       |
| 30 | Coronary artery disease, <i>n</i> (%)        | 507 (47.6%) | 447 (29.4%)  | 0.38 | 378 (40.4%) | 372 (39.7%) | 0.01  |
| 31 |                                              |             |              |      |             |             |       |
| 32 |                                              |             |              |      |             |             |       |
| 33 | Previous myocardial infarction, <i>n</i> (%) | 108 (10.1%) | 50 (3.3%)    | 0.28 | 48 (5.1%)   | 48 (5.1%)   | <0.01 |
| 34 |                                              |             |              |      |             |             |       |
| 35 |                                              |             |              |      |             |             |       |
| 36 |                                              |             |              |      |             |             |       |
| 37 |                                              |             |              |      |             |             |       |
| 38 |                                              |             |              |      |             |             |       |
| 39 |                                              |             |              |      |             |             |       |
| 40 |                                              |             |              |      |             |             |       |
| 41 |                                              |             |              |      |             |             |       |
| 42 |                                              |             |              |      |             |             |       |
| 43 |                                              |             |              |      |             |             |       |
| 44 |                                              |             |              |      |             |             |       |
| 45 |                                              |             |              |      |             |             |       |
| 46 |                                              |             |              |      |             |             |       |

|    |                                                        |             |             |      |             |             |       |
|----|--------------------------------------------------------|-------------|-------------|------|-------------|-------------|-------|
| 1  |                                                        |             |             |      |             |             |       |
| 2  |                                                        |             |             |      |             |             |       |
| 3  |                                                        |             |             |      |             |             |       |
| 4  | Previous percutaneous coronary intervention, <i>n</i>  |             |             |      |             |             |       |
| 5  |                                                        |             |             |      |             |             |       |
| 6  |                                                        |             |             |      |             |             |       |
| 7  | (%)                                                    | 342 (32.1%) | 284 (18.7%) | 0.31 | 249 (26.6%) | 238 (25.4%) | 0.03  |
| 8  |                                                        |             |             |      |             |             |       |
| 9  |                                                        |             |             |      |             |             |       |
| 10 |                                                        |             |             |      |             |             |       |
| 11 | Previous coronary artery bypass grafting, <i>n</i> (%) | 112 (10.5%) | 57 (3.7%)   | 0.27 | 60 (6.4%)   | 57 (6.1%)   | 0.01  |
| 12 |                                                        |             |             |      |             |             |       |
| 13 |                                                        |             |             |      |             |             |       |
| 14 |                                                        |             |             |      |             |             |       |
| 15 | Peripheral artery disease, <i>n</i> (%)                | 161 (15.1%) | 216 (14.2%) | 0.03 | 136 (14.5%) | 128 (13.7%) | 0.02  |
| 16 |                                                        |             |             |      |             |             |       |
| 17 |                                                        |             |             |      |             |             |       |
| 18 |                                                        |             |             |      |             |             |       |
| 19 | Previous stroke, <i>n</i> (%)                          | 127 (11.9%) | 174 (11.4%) | 0.02 | 116 (12.4%) | 102 (10.9%) | 0.05  |
| 20 |                                                        |             |             |      |             |             |       |
| 21 |                                                        |             |             |      |             |             |       |
| 22 | STS risk score                                         | 7.7±6.0     | 8.6±7.5     | 0.13 | 7.7±6.1     | 7.7±5.3     | <0.01 |
| 23 |                                                        |             |             |      |             |             |       |
| 24 |                                                        |             |             |      |             |             |       |
| 25 |                                                        |             |             |      |             |             |       |
| 26 | Renin-angiotensin inhibitor, <i>n</i> (%)              | 639 (60.0%) | 748 (49.1%) | 0.22 | 540 (57.7%) | 544 (58.1%) | 0.01  |
| 27 |                                                        |             |             |      |             |             |       |
| 28 |                                                        |             |             |      |             |             |       |
| 29 |                                                        |             |             |      |             |             |       |
| 30 | β blocker, <i>n</i> (%)                                | 384 (36.1%) | 496 (32.6%) | 0.07 | 334 (35.7%) | 303 (32.4%) | 0.07  |
| 31 |                                                        |             |             |      |             |             |       |
| 32 |                                                        |             |             |      |             |             |       |
| 33 | eGFR, mL/min/1.73 m <sup>2</sup>                       | 51.7±18.5   | 51.1±20.1   | 0.03 | 52.3±18.6   | 51.7±19.6   | 0.03  |
| 34 |                                                        |             |             |      |             |             |       |
| 35 |                                                        |             |             |      |             |             |       |
| 36 |                                                        |             |             |      |             |             |       |
| 37 | Haemoglobin, g/dL                                      | 11.4±1.7    | 11.1±1.7    | 0.17 | 11.4±1.7    | 11.2±1.6    | 0.15  |
| 38 |                                                        |             |             |      |             |             |       |
| 39 |                                                        |             |             |      |             |             |       |
| 40 |                                                        |             |             |      |             |             |       |
| 41 |                                                        |             |             |      |             |             |       |
| 42 |                                                        |             |             |      |             |             |       |
| 43 |                                                        |             |             |      |             |             |       |
| 44 |                                                        |             |             |      |             |             |       |
| 45 |                                                        |             |             |      |             |             |       |
| 46 |                                                        |             |             |      |             |             |       |

|                                                            |            |            |       |            |            |       |
|------------------------------------------------------------|------------|------------|-------|------------|------------|-------|
| LDL-c, mg/dL                                               | 104.3±28.9 | 94.2±28.0  | 0.35  | 105.9±28.2 | 94.8±27.8  | 0.4   |
| HDL-c, mg/dL                                               | 52.9±15.8  | 53.6±15.0  | 0.04  | 53.5±16.3  | 54.3±15.0  | 0.05  |
| Triglyceride, mg/dL                                        | 106.8±57.6 | 110.5±53.0 | 0.07  | 109.6±60.9 | 110.2±53.2 | 0.01  |
| Preprocedural echocardiographic data                       |            |            |       |            |            |       |
| Aortic valve area, cm <sup>2</sup>                         | 0.64±0.17  | 0.63±0.17  | 0.04  | 0.63±0.17  | 0.63±0.16  | <0.01 |
| Indexed aortic valve area, cm <sup>2</sup> /m <sup>2</sup> | 0.44±0.12  | 0.44±0.12  | <0.01 | 0.44±0.12  | 0.45±0.12  | 0.03  |
| Mean aortic gradient, mmHg                                 | 50.0±18.1  | 51.0±18.4  | 0.05  | 51.0±18.2  | 50.8±18.2  | 0.01  |
| Peak velocity, m/sec                                       | 4.5±0.8    | 4.6±0.8    | 0.07  | 4.6±0.8    | 4.6±0.8    | 0.02  |
| Ejection fraction, %                                       | 59.2±12.7  | 59.2±12.6  | <0.01 | 59.6±12.4  | 59.7±12.0  | 0.01  |
| Severe aortic regurgitation, <i>n</i> (%)                  | 12 (0.8%)  | 4 (0.4%)   | 0.05  | 7 (0.8%)   | 4 (0.4%)   | 0.04  |

|                                           |             |              |      |             |             |      |
|-------------------------------------------|-------------|--------------|------|-------------|-------------|------|
| Severe mitral regurgitation, <i>n</i> (%) | 21 (1.4%)   | 12 (1.1%)    | 0.02 | 12 (1.3%)   | 6 (0.6%)    | 0.07 |
| Pulmonary hypertension, <i>n</i> (%)      | 40 (3.8%)   | 62 (4.1%)    | 0.02 | 37 (4.0%)   | 33 (3.5%)   | 0.02 |
| Preprocedural CT data                     |             |              |      |             |             |      |
| Annular area, mm <sup>2</sup>             | 395.5±70.7  | 400.7±71.0   | 0.07 | 395.9±70.2  | 396.5±69.1  | 0.01 |
| Procedural variables                      |             |              |      |             |             |      |
| Transfemoral approach, <i>n</i> (%)       | 873 (82.0%) | 1294 (85.0%) | 0.08 | 770 (82.3%) | 784 (83.8%) | 0.04 |
| Local anaesthesia, <i>n</i> (%)           | 799 (75.0%) | 1179 (77.4%) | 0.06 | 714 (76.3%) | 734 (78.4%) | 0.05 |
| Contrast volume, mL                       | 115.8±59.1  | 115.4±58.0   | 0.01 | 118.8±60.0  | 113.5±57.1  | 0.09 |
| Fluoroscopy time, min                     | 21.7±12.5   | 21.1±10.0    | 0.05 | 21.9±12.6   | 21.0±10.0   | 0.08 |
| Procedure time, min                       | 81.6±45.8   | 80.3±45.4    | 0.03 | 81.6±43.0   | 80.4±43.6   | 0.03 |

1  
2  
3 CT, computed tomography; eGFR, estimated glomerular filtration rate; HDL-c, high-density lipoprotein cholesterol; LDL-c, low-density  
4  
5 lipoprotein cholesterol; NYHA, New York Heart Association; STS, Society of Thoracic Surgeons.  
6  
7  
8  
9  
10  
11  
12  
13  
14  
15  
16  
17  
18  
19  
20  
21  
22  
23  
24  
25  
26  
27  
28  
29  
30  
31  
32  
33  
34  
35  
36  
37  
38  
39  
40  
41  
42  
43  
44  
45  
46

For peer review only



**Table 2**

In-hospital outcomes before and after propensity score matching

|                                     | Before matching              |                              |                |                            | After matching              |                             |                |                            |
|-------------------------------------|------------------------------|------------------------------|----------------|----------------------------|-----------------------------|-----------------------------|----------------|----------------------------|
|                                     | Statin (+)<br><i>n</i> =1065 | Statin (-)<br><i>n</i> =1523 | <i>P</i> value | Standardised<br>difference | Statin (+)<br><i>n</i> =936 | Statin (-)<br><i>n</i> =936 | <i>P</i> value | Standardised<br>difference |
| All-cause mortality, <i>n</i> (%)   | 27 (2.5%)                    | 43 (2.8%)                    | 0.66           | 0.02                       | 20 (2.1%)                   | 23 (2.5%)                   | 0.64           | 0.02                       |
| Acute kidney injury, <i>n</i> (%)   | 111 (10.4%)                  | 178 (11.7%)                  | 0.31           | 0.04                       | 96 (10.3%)                  | 105 (11.2%)                 | 0.50           | 0.03                       |
| Stroke, <i>n</i> (%)                | 27 (2.5%)                    | 34 (2.2%)                    | 0.62           | 0.02                       | 24 (2.6%)                   | 19 (2.0%)                   | 0.44           | 0.04                       |
| Vascular complication, <i>n</i> (%) | 105 (9.9%)                   | 128 (8.4%)                   | 0.21           | 0.05                       | 90 (9.6%)                   | 78 (8.3%)                   | 0.33           | 0.05                       |

| Postprocedural echocardiographic data                           |           |            |      |      |           |           |      |       |  |
|-----------------------------------------------------------------|-----------|------------|------|------|-----------|-----------|------|-------|--|
| Effective orifice area, cm <sup>2</sup>                         | 1.67±0.45 | 1.69±0.45  | 0.53 | 0.03 | 1.68±0.44 | 1.66±0.43 | 0.34 | 0.04  |  |
| Indexed effective orifice area, cm <sup>2</sup> /m <sup>2</sup> | 1.17±0.32 | 1.20±0.31  | 0.02 | 0.10 | 1.18±0.32 | 1.18±0.30 | 0.99 | <0.01 |  |
| Mean aortic gradient, mmHg                                      | 11.0±4.4  | 10.6±4.7   | 0.08 | 0.07 | 11.0±4.4  | 11.0±4.9  | 0.92 | <0.01 |  |
| Peak velocity, m/sec                                            | 2.3±0.4   | 2.2±0.5    | 0.10 | 0.07 | 2.3±0.5   | 2.3±0.5   | 0.98 | <0.01 |  |
| Moderate or severe aortic regurgitation, <i>n</i> (%)           | 18 (1.7%) | 31 (2.1%)  | 0.51 | 0.03 | 17 (1.8%) | 20 (2.2%) | 0.61 | 0.02  |  |
| Moderate or severe mitral regurgitation, <i>n</i> (%)           | 59 (5.6%) | 100 (6.6%) | 0.27 | 0.04 | 45 (4.8%) | 51 (5.5%) | 0.52 | 0.03  |  |

**Table 3**

The univariate and multivariate Cox proportional regression analyses of the all-cause mortality in the overall cohort.

|                                | Univariate analysis |         | Multivariate analysis |         |
|--------------------------------|---------------------|---------|-----------------------|---------|
|                                | HR (95% CI)         | P value | adjusted HR (95% CI)  | P value |
| Men                            | 1.30 (1.18-1.42)    | <0.01   | 1.40 (1.25-1.57)      | <0.01   |
| Age                            | 1.01 (0.99-1.03)    | 0.13    | 0.99 (0.97-1.01)      | 0.31    |
| Clinical Frailty Scale 1-3     | 0.77 (0.70-0.85)    | <0.01   | 0.81 (0.73-0.90)      | <0.01   |
| NYHA class 3 or 4              | 1.33 (1.21-1.46)    | <0.01   | 1.18 (1.07-1.31)      | <0.01   |
| Smoking                        | 1.20 (1.08-1.33)    | <0.01   | 1.02 (0.90-1.15)      | 0.74    |
| Diabetes mellitus              | 1.12 (1.00-1.24)    | 0.04    | 0.99 (0.89-1.11)      | 0.87    |
| Hypertension                   | 0.97 (0.88-1.09)    | 0.63    | 0.97 (0.86-1.08)      | 0.54    |
| Previous myocardial infarction | 1.32 (1.13-1.52)    | <0.01   | 1.14 (0.96-1.35)      | 0.14    |

|    |                                          |                  |       |                  |       |
|----|------------------------------------------|------------------|-------|------------------|-------|
| 1  |                                          |                  |       |                  |       |
| 2  |                                          |                  |       |                  |       |
| 3  |                                          |                  |       |                  |       |
| 4  | Previous coronary artery bypass grafting | 1.21 (1.02-1.40) | 0.03  | 1.05 (0.88-1.24) | 0.60  |
| 5  |                                          |                  |       |                  |       |
| 6  |                                          |                  |       |                  |       |
| 7  | Peripheral artery disease                | 1.35 (1.21-1.50) | <0.01 | 1.08 (0.95-1.22) | 0.24  |
| 8  |                                          |                  |       |                  |       |
| 9  |                                          |                  |       |                  |       |
| 10 | Previous stroke                          | 1.14 (0.99-1.30) | 0.06  | 1.04 (0.90-1.19) | 0.62  |
| 11 |                                          |                  |       |                  |       |
| 12 |                                          |                  |       |                  |       |
| 13 | Atrial fibrillation                      | 1.19 (1.07-1.32) | <0.01 | 1.00 (0.90-1.12) | 0.98  |
| 14 |                                          |                  |       |                  |       |
| 15 |                                          |                  |       |                  |       |
| 16 | STS risk score                           | 1.04 (1.03-1.04) | <0.01 | 1.02 (1.01-1.03) | <0.01 |
| 17 |                                          |                  |       |                  |       |
| 18 |                                          |                  |       |                  |       |
| 19 |                                          |                  |       |                  |       |
| 20 | eGFR, mL/min/1.73 m <sup>2</sup>         | 0.98 (0.98-0.99) | <0.01 | 0.99 (0.99-1.00) | <0.01 |
| 21 |                                          |                  |       |                  |       |
| 22 |                                          |                  |       |                  |       |
| 23 | Haemoglobin, g/dL                        | 0.83 (0.78-0.88) | <0.01 | 0.85 (0.80-0.91) | <0.01 |
| 24 |                                          |                  |       |                  |       |
| 25 |                                          |                  |       |                  |       |
| 26 | Medication at admission                  |                  |       |                  |       |
| 27 |                                          |                  |       |                  |       |
| 28 |                                          |                  |       |                  |       |
| 29 | Statin                                   | 0.84 (0.77-0.93) | <0.01 | 0.86 (0.77-0.95) | <0.01 |
| 30 |                                          |                  |       |                  |       |
| 31 |                                          |                  |       |                  |       |
| 32 | Renin-angiotensin inhibitor              | 0.92 (0.84-1.01) | 0.08  | 0.88 (0.80-0.97) | 0.01  |
| 33 |                                          |                  |       |                  |       |
| 34 |                                          |                  |       |                  |       |
| 35 | β blocker                                | 1.09 (0.99-1.20) | 0.08  | 1.06 (0.96-1.16) | 0.28  |
| 36 |                                          |                  |       |                  |       |
| 37 |                                          |                  |       |                  |       |
| 38 | Preprocedural echocardiographic data     |                  |       |                  |       |
| 39 |                                          |                  |       |                  |       |
| 40 |                                          |                  |       |                  |       |
| 41 |                                          |                  |       |                  |       |
| 42 |                                          |                  |       |                  |       |
| 43 |                                          |                  |       |                  |       |
| 44 |                                          |                  |       |                  |       |
| 45 |                                          |                  |       |                  |       |
| 46 |                                          |                  |       |                  |       |

|    |                                                    |                  |       |                  |       |
|----|----------------------------------------------------|------------------|-------|------------------|-------|
| 1  |                                                    |                  |       |                  |       |
| 2  |                                                    |                  |       |                  |       |
| 3  |                                                    |                  |       |                  |       |
| 4  | Aortic valve area, cm <sup>2</sup> /m <sup>2</sup> | 1.29 (0.76-2.20) | 0.35  | 1.23 (0.63-2.38) | 0.54  |
| 5  |                                                    |                  |       |                  |       |
| 6  |                                                    |                  |       |                  |       |
| 7  | Peak velocity, mmHg                                | 0.75 (0.67-0.85) | <0.01 | 0.76 (0.66-0.88) | <0.01 |
| 8  |                                                    |                  |       |                  |       |
| 9  |                                                    |                  |       |                  |       |
| 10 | Ejection fraction, %                               | 0.99 (0.98-0.99) | 0.03  | 1.01 (1.00-1.02) | 0.02  |
| 11 |                                                    |                  |       |                  |       |
| 12 |                                                    |                  |       |                  |       |
| 13 | Pulmonary hypertension                             | 1.50 (1.25-1.78) | <0.01 | 1.27 (1.05-1.53) | 0.01  |
| 14 |                                                    |                  |       |                  |       |
| 15 |                                                    |                  |       |                  |       |
| 16 | Severe aortic regurgitation                        | 0.56 (0.13-1.19) | 0.16  | 0.57 (0.21-1.51) | 0.26  |
| 17 |                                                    |                  |       |                  |       |
| 18 |                                                    |                  |       |                  |       |
| 19 | Severe mitral regurgitation                        | 1.34 (0.93-1.81) | 0.11  | 0.99 (0.70-1.40) | 0.96  |
| 20 |                                                    |                  |       |                  |       |
| 21 |                                                    |                  |       |                  |       |
| 22 | Procedural variables                               |                  |       |                  |       |
| 23 |                                                    |                  |       |                  |       |
| 24 |                                                    |                  |       |                  |       |
| 25 | Transfemoral approach                              | 0.81 (0.73-0.91) | <0.01 | 0.87 (0.77-0.98) | 0.03  |
| 26 |                                                    |                  |       |                  |       |
| 27 |                                                    |                  |       |                  |       |
| 28 | Local anaesthesia                                  | 0.89 (0.79-1.01) | 0.07  | 0.92 (0.81-1.05) | 0.22  |
| 29 |                                                    |                  |       |                  |       |
| 30 |                                                    |                  |       |                  |       |
| 31 |                                                    |                  |       |                  |       |
| 32 |                                                    |                  |       |                  |       |

33 CI, confidence interval; eGFR, estimated glomerular filtration rate; HR, hazard ratio; NYHA, New York Heart Association; STS, Society of  
 34 Thoracic Surgeons.

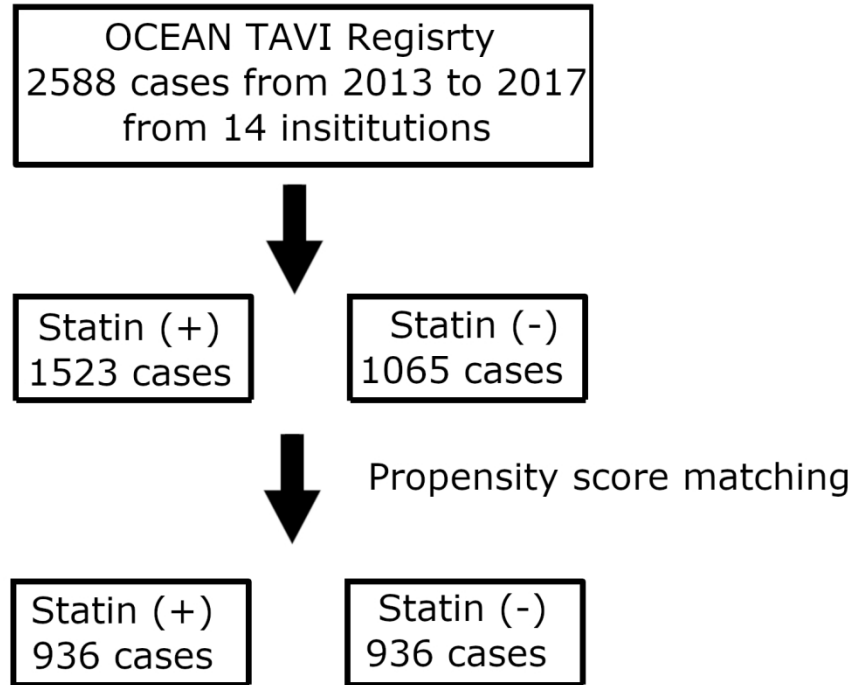

Figure 1

Flowchart of patient selection for the present study.  
OCEAN; Optimized CathEter vAlvular iNtervention; TAVI, transcatheter aortic valve implantation.

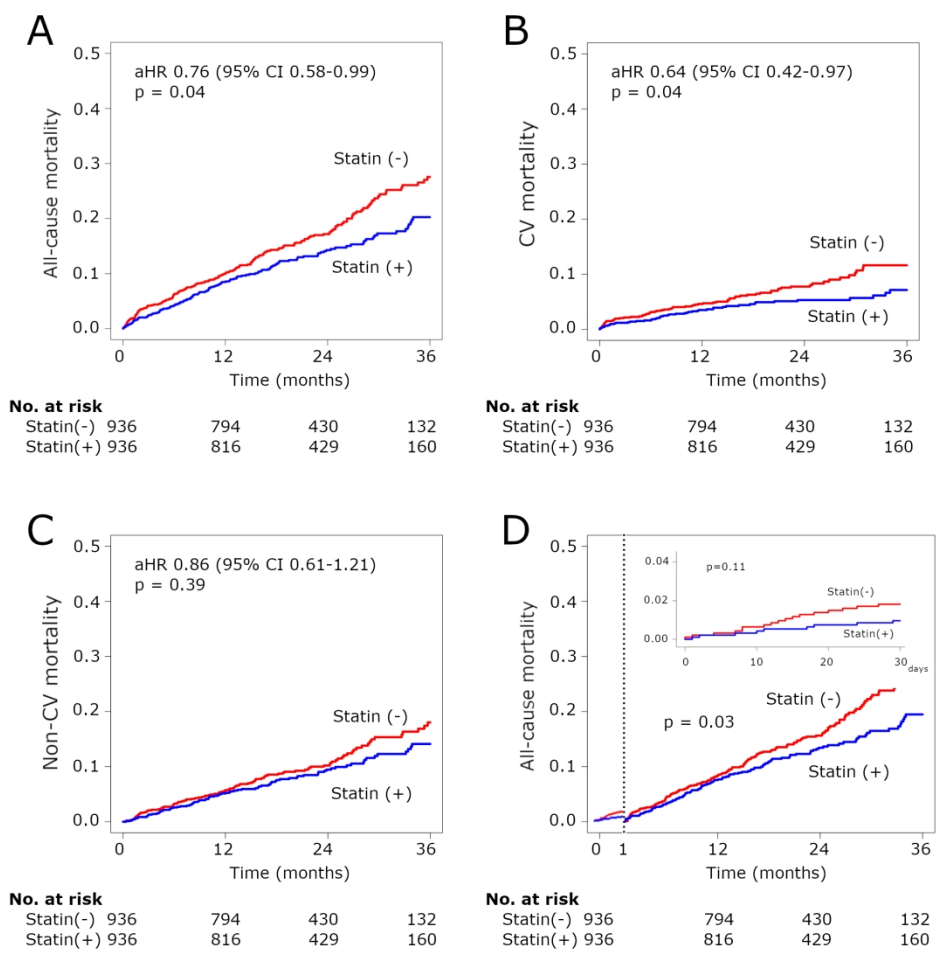

Figure 2

Kaplan-Meier curves for mid-term and 30-day mortality in the matched cohort. a, b, c: Kaplan-Meier curves for mid-term all-cause mortality (a), CV mortality (b), and non-CV mortality (c) in the matched cohort. d: Kaplan-Meier curve for 30-day all-cause mortality and mid-term all-cause mortality with the landmark analysis from 30 days in the matched cohort. CI, confidence interval; CV, cardiovascular; HR, hazard ratio.



Figure 3

Kaplan-Meier curves for all-cause mortality in the octogenarian and nonagenarian cohort.



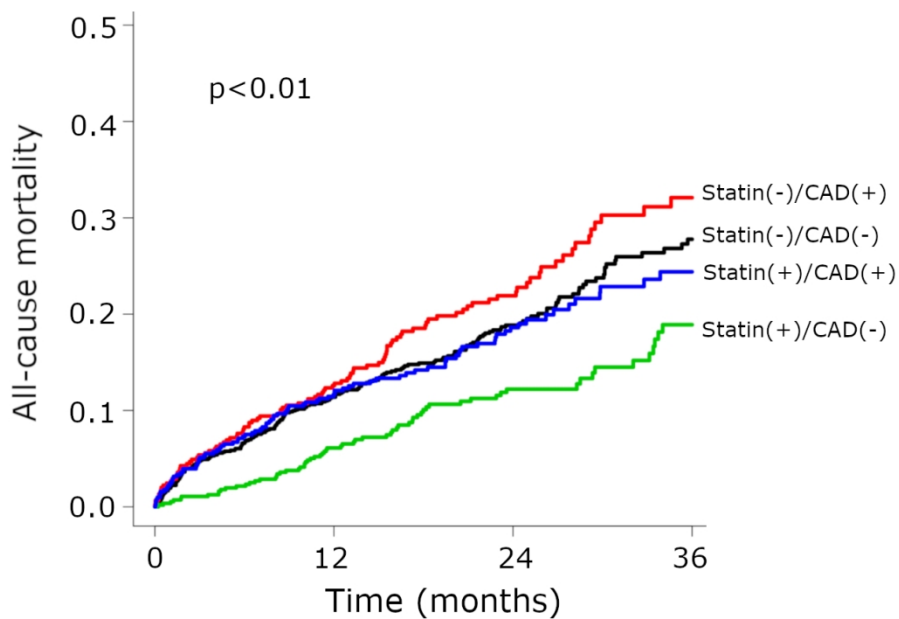

| <b>No. at risk</b> |      |     |     |     |
|--------------------|------|-----|-----|-----|
| Statin(-)/CAD(+)   | 447  | 368 | 201 | 59  |
| Statin(-)/CAD(-)   | 1076 | 895 | 456 | 142 |
| Statin(+)/CAD(+)   | 507  | 428 | 231 | 87  |
| Statin(+)/CAD(-)   | 558  | 497 | 256 | 93  |

Figure 4  
Kaplan-Meier curve for all-cause mortality according to previous coronary artery disease and statin therapy in the overall cohort.  
CAD, coronary artery disease.

1  
2  
3  
4  
5  
6  
7  
8  
9  
10  
11  
12  
13  
14  
15  
16  
17  
18  
19  
20  
21  
22  
23  
24  
25  
26  
27  
28  
29  
30  
31  
32  
33  
34  
35  
36  
37  
38  
39  
40  
41  
42  
43  
44  
45  
46  
47  
48  
49  
50  
51  
52  
53  
54  
55  
56  
57  
58  
59  
60

**Supplementary material online**

**Supplementary Figure S1**

Distribution of propensity scores between statin and non-statin groups in the overall cohort.



### Supplementary Table S1

Patient characteristics of the propensity score matched and unmatched groups

|                                      | Unmatched                       |                        | <i>P</i> -value |
|--------------------------------------|---------------------------------|------------------------|-----------------|
|                                      | Matched group<br><i>n</i> =1872 | group<br><i>n</i> =716 |                 |
| Preprocedural variables              |                                 |                        |                 |
| Age, years                           | 84.2±5.1                        | 84.6±5.4               | 0.08            |
| Male, <i>n</i> (%)                   | 532 (28.4%)                     | 263 (36.7%)            | <0.01           |
| Body surface area, m <sup>2</sup>    | 1.43±0.17                       | 1.42±0.17              | 0.16            |
| NYHA class 3 or 4, <i>n</i> (%)      | 919 (49.1%)                     | 402 (56.2%)            | <0.01           |
| Clinical Frailty Scale               | 3.8±1.2                         | 4.2±1.4                | <0.01           |
| Smoking, <i>n</i> (%)                | 364 (19.4%)                     | 160 (22.4%)            | 0.10            |
| Diabetes mellitus, <i>n</i> (%)      | 402 (21.5%)                     | 153 (21.4%)            | 0.95            |
| Hypertension, <i>n</i> (%)           | 1497 (80.0%)                    | 493 (68.9%)            | <0.01           |
| Chronic kidney disease, <i>n</i> (%) | 1291 (69.0%)                    | 518 (72.4%)            | 0.09            |
| Atrial fibrillation, <i>n</i> (%)    | 364 (19.4%)                     | 185 (25.8%)            | <0.01           |

|                                                              |              |             |       |
|--------------------------------------------------------------|--------------|-------------|-------|
| Coronary artery disease, <i>n</i> (%)                        | 750 (40.1%)  | 204 (28.5%) | <0.01 |
| Previous myocardial infarction, <i>n</i> (%)                 | 96 (5.1%)    | 62 (8.7%)   | <0.01 |
| Previous percutaneous coronary intervention,<br><i>n</i> (%) | 487 (26.0%)  | 139 (19.4%) | <0.01 |
| Previous coronary artery bypass grafting, <i>n</i><br>(%)    | 117 (6.3%)   | 52 (7.3%)   | 0.36  |
| Peripheral artery disease, <i>n</i> (%)                      | 264 (14.1%)  | 113 (15.8%) | 0.28  |
| Previous stroke, <i>n</i> (%)                                | 9 (0.5%)     | 3 (0.4%)    | 0.98  |
| STS risk score                                               | 7.7±5.7      | 9.8±9.2     | <0.01 |
| Renin-angiotensin inhibitor, <i>n</i> (%)                    | 1084 (57.9%) | 303 (42.3%) | <0.01 |
| Beta blocker, <i>n</i> (%)                                   | 637 (34.0%)  | 243 (33.9%) | 0.97  |
| eGFR, mL/min/1.73 m <sup>2</sup>                             | 52.0±19.1    | 49.7±20.1   | <0.01 |
| Haemoglobin, g/dL                                            | 11.3±1.6     | 11.2±1.7    | 0.16  |
| Procedural variables                                         |              |             |       |
| Transfemoral approach, <i>n</i> (%)                          | 1554 (83.0%) | 613 (85.6%) | 0.11  |

|                                 |              |             |      |
|---------------------------------|--------------|-------------|------|
| Local anaesthesia, <i>n</i> (%) | 1448 (77.4%) | 530 (74.0%) | 0.08 |
| Contrast volume, mL             | 116.1±58.6   | 114.1±58.2  | 0.43 |
| Fluoroscopy time, min           | 21.4±11.4    | 21.2±10.5   | 0.66 |
| Procedure time, min             | 81.0±43.3    | 80.3±50.9   | 0.72 |

CT, computed tomography; eGFR, estimated glomerular filtration rate; NYHA, New York Heart Association; STS, Society of Thoracic Surgeons.

1  
2  
3 **Supplementary Table S2**  
4

5 In-hospital outcomes of the propensity score-matched and -unmatched groups  
6  
7

|                                     | <b>Matched group</b> | <b>Unmatched group</b> | <b>P-value</b> |
|-------------------------------------|----------------------|------------------------|----------------|
|                                     | <b>n=1872</b>        | <b>n=716</b>           |                |
| All-cause mortality, <i>n</i> (%)   | 43 (2.3%)            | 27 (3.8%)              | <0.01          |
| Acute kidney injury, <i>n</i> (%)   | 201 (10.7%)          | 88 (12.3%)             | 0.27           |
| Bleeding, <i>n</i> (%)              | 421 (22.5%)          | 199 (27.8%)            | <0.01          |
| Stroke, <i>n</i> (%)                | 43 (2.3%)            | 18 (2.5%)              | 0.75           |
| Vascular complication, <i>n</i> (%) | 168 (9.0%)           | 65 (9.1%)              | 0.93           |

**STROBE 2007 (v4) Statement—Checklist of items that should be included in reports of *cohort studies***

| Section/Topic                | Item # | Recommendation                                                                                                                                                                       | Reported on page # |
|------------------------------|--------|--------------------------------------------------------------------------------------------------------------------------------------------------------------------------------------|--------------------|
| <b>Title and abstract</b>    | 1      | (a) Indicate the study's design with a commonly used term in the title or the abstract                                                                                               | 3                  |
|                              |        | (b) Provide in the abstract an informative and balanced summary of what was done and what was found                                                                                  | 3                  |
| <b>Introduction</b>          |        |                                                                                                                                                                                      |                    |
| Background/rationale         | 2      | Explain the scientific background and rationale for the investigation being reported                                                                                                 | 5                  |
| Objectives                   | 3      | State specific objectives, including any prespecified hypotheses                                                                                                                     | 5                  |
| <b>Methods</b>               |        |                                                                                                                                                                                      |                    |
| Study design                 | 4      | Present key elements of study design early in the paper                                                                                                                              | 4-6                |
| Setting                      | 5      | Describe the setting, locations, and relevant dates, including periods of recruitment, exposure, follow-up, and data collection                                                      | 4-6                |
| Participants                 | 6      | (a) Give the eligibility criteria, and the sources and methods of selection of participants. Describe methods of follow-up                                                           | 4-6                |
|                              |        | (b) For matched studies, give matching criteria and number of exposed and unexposed                                                                                                  | 6                  |
| Variables                    | 7      | Clearly define all outcomes, exposures, predictors, potential confounders, and effect modifiers. Give diagnostic criteria, if applicable                                             | 5-6                |
| Data sources/<br>measurement | 8*     | For each variable of interest, give sources of data and details of methods of assessment (measurement). Describe comparability of assessment methods if there is more than one group | 5-6                |
| Bias                         | 9      | Describe any efforts to address potential sources of bias                                                                                                                            | 6                  |
| Study size                   | 10     | Explain how the study size was arrived at                                                                                                                                            | 4-5                |
| Quantitative variables       | 11     | Explain how quantitative variables were handled in the analyses. If applicable, describe which groupings were chosen and why                                                         | 5-6                |
| Statistical methods          | 12     | (a) Describe all statistical methods, including those used to control for confounding                                                                                                | 6                  |
|                              |        | (b) Describe any methods used to examine subgroups and interactions                                                                                                                  | 6                  |
|                              |        | (c) Explain how missing data were addressed                                                                                                                                          | NA                 |
|                              |        | (d) If applicable, explain how loss to follow-up was addressed                                                                                                                       | NA                 |
|                              |        | (e) Describe any sensitivity analyses                                                                                                                                                | NA                 |
| <b>Results</b>               |        |                                                                                                                                                                                      |                    |

|                          |     |                                                                                                                                                                                                              |           |
|--------------------------|-----|--------------------------------------------------------------------------------------------------------------------------------------------------------------------------------------------------------------|-----------|
| Participants             | 13* | (a) Report numbers of individuals at each stage of study—eg numbers potentially eligible, examined for eligibility, confirmed eligible, included in the study, completing follow-up, and analysed            | Figure2-4 |
|                          |     | (b) Give reasons for non-participation at each stage                                                                                                                                                         | NA        |
|                          |     | (c) Consider use of a flow diagram                                                                                                                                                                           | Figure1   |
| Descriptive data         | 14* | (a) Give characteristics of study participants (eg demographic, clinical, social) and information on exposures and potential confounders                                                                     | 12        |
|                          |     | (b) Indicate number of participants with missing data for each variable of interest                                                                                                                          | NA        |
|                          |     | (c) Summarise follow-up time (eg, average and total amount)                                                                                                                                                  | 9         |
| Outcome data             | 15* | Report numbers of outcome events or summary measures over time                                                                                                                                               | 9         |
| Main results             | 16  | (a) Give unadjusted estimates and, if applicable, confounder-adjusted estimates and their precision (eg, 95% confidence interval). Make clear which confounders were adjusted for and why they were included | 9         |
|                          |     | (b) Report category boundaries when continuous variables were categorized                                                                                                                                    | NA        |
|                          |     | (c) If relevant, consider translating estimates of relative risk into absolute risk for a meaningful time period                                                                                             | NA        |
| Other analyses           | 17  | Report other analyses done—eg analyses of subgroups and interactions, and sensitivity analyses                                                                                                               | 9-10      |
| <b>Discussion</b>        |     |                                                                                                                                                                                                              |           |
| Key results              | 18  | Summarise key results with reference to study objectives                                                                                                                                                     | 10        |
| <b>Limitations</b>       |     |                                                                                                                                                                                                              |           |
| Interpretation           | 20  | Give a cautious overall interpretation of results considering objectives, limitations, multiplicity of analyses, results from similar studies, and other relevant evidence                                   | 12        |
| Generalisability         | 21  | Discuss the generalisability (external validity) of the study results                                                                                                                                        | 12        |
| <b>Other information</b> |     |                                                                                                                                                                                                              |           |
| Funding                  | 22  | Give the source of funding and the role of the funders for the present study and, if applicable, for the original study on which the present article is based                                                | 13        |

\*Give information separately for cases and controls in case-control studies and, if applicable, for exposed and unexposed groups in cohort and cross-sectional studies.

**Note:** An Explanation and Elaboration article discusses each checklist item and gives methodological background and published examples of transparent reporting. The STROBE checklist is best used in conjunction with this article (freely available on the Web sites of PLoS Medicine at <http://www.plosmedicine.org/>, Annals of Internal Medicine at <http://www.annals.org/>, and Epidemiology at <http://www.epidem.com/>). Information on the STROBE Initiative is available at [www.strobe-statement.org](http://www.strobe-statement.org).
