# Supplementary material for: Statin therapy for patients with aortic stenosis who underwent transcatheter aortic valve implantation: a report from a Japanese multicentre registry
Source: PubMed Central journal article supplement — BMJ Open. 2021 Jun 11;11(6):e044319. doi: 10.1136/bmjopen-2020-044319 (PMC8202100; doi:10.1136/bmjopen-2020-044319), 2021-06-11
Supplement: bmjopen-2020-044319supp001.pdf [file bmjopen-2020-044319supp001.pdf]

**Supplementary material online****Supplementary Figure S1**

Distribution of propensity scores between statin and non-statin groups in the overall cohort.

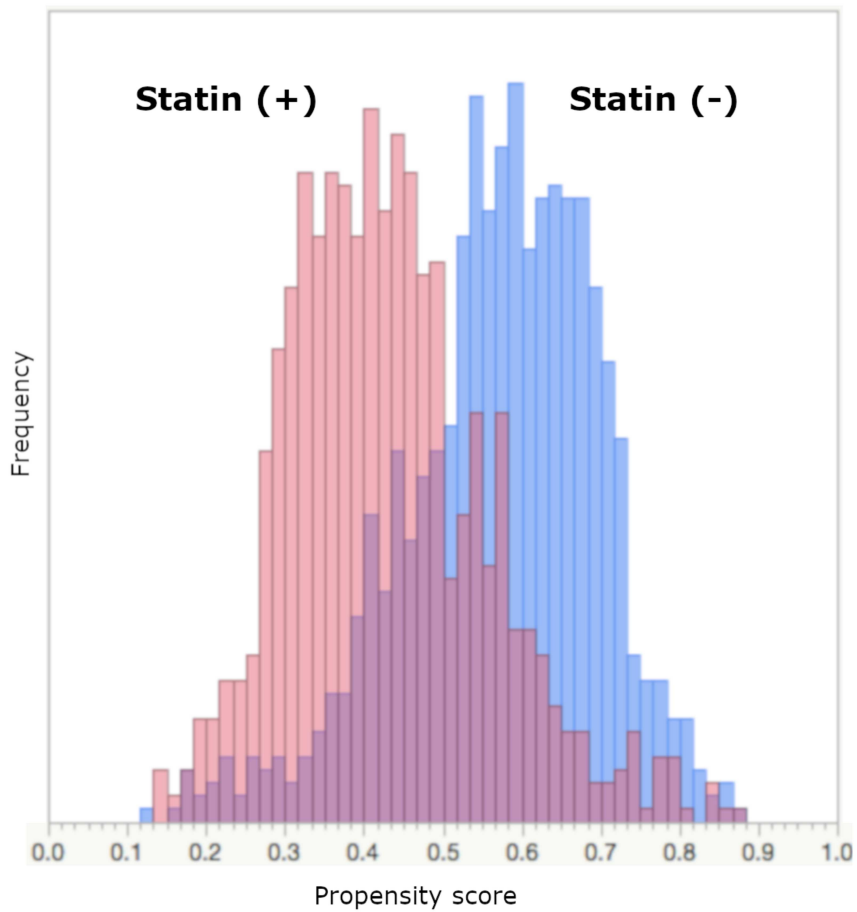

**Supplementary Table S1**

Patient characteristics of the propensity score matched and unmatched groups

|                                   | <b>Unmatched</b>     |              | <b>P-value</b> |
|-----------------------------------|----------------------|--------------|----------------|
|                                   | <b>Matched group</b> | <b>group</b> |                |
|                                   | <b>n=1872</b>        | <b>n=716</b> |                |
| <b>Preprocedural variables</b>    |                      |              |                |
| Age, years                        | 84.2±5.1             | 84.6±5.4     | 0.08           |
| Male, n (%)                       | 532 (28.4%)          | 263 (36.7%)  | <0.01          |
| Body surface area, m <sup>2</sup> | 1.43±0.17            | 1.42±0.17    | 0.16           |
| NYHA class 3 or 4, n (%)          | 919 (49.1%)          | 402 (56.2%)  | <0.01          |
| Clinical Frailty Scale            | 3.8±1.2              | 4.2±1.4      | <0.01          |
| Smoking, n (%)                    | 364 (19.4%)          | 160 (22.4%)  | 0.10           |
| Diabetes mellitus, n (%)          | 402 (21.5%)          | 153 (21.4%)  | 0.95           |
| Hypertension, n (%)               | 1497 (80.0%)         | 493 (68.9%)  | <0.01          |
| Chronic kidney disease, n (%)     | 1291 (69.0%)         | 518 (72.4%)  | 0.09           |
| Atrial fibrillation, n (%)        | 364 (19.4%)          | 185 (25.8%)  | <0.01          |

|                                                              |              |             |       |
|--------------------------------------------------------------|--------------|-------------|-------|
| Coronary artery disease, <i>n</i> (%)                        | 750 (40.1%)  | 204 (28.5%) | <0.01 |
| Previous myocardial infarction, <i>n</i> (%)                 | 96 (5.1%)    | 62 (8.7%)   | <0.01 |
| Previous percutaneous coronary intervention,<br><i>n</i> (%) | 487 (26.0%)  | 139 (19.4%) | <0.01 |
| Previous coronary artery bypass grafting, <i>n</i><br>(%)    | 117 (6.3%)   | 52 (7.3%)   | 0.36  |
| Peripheral artery disease, <i>n</i> (%)                      | 264 (14.1%)  | 113 (15.8%) | 0.28  |
| Previous stroke, <i>n</i> (%)                                | 9 (0.5%)     | 3 (0.4%)    | 0.98  |
| STS risk score                                               | 7.7±5.7      | 9.8±9.2     | <0.01 |
| Renin-angiotensin inhibitor, <i>n</i> (%)                    | 1084 (57.9%) | 303 (42.3%) | <0.01 |
| Beta blocker, <i>n</i> (%)                                   | 637 (34.0%)  | 243 (33.9%) | 0.97  |
| eGFR, mL/min/1.73 m <sup>2</sup>                             | 52.0±19.1    | 49.7±20.1   | <0.01 |
| Haemoglobin, g/dL                                            | 11.3±1.6     | 11.2±1.7    | 0.16  |
| Procedural variables                                         |              |             |       |
| Transfemoral approach, <i>n</i> (%)                          | 1554 (83.0%) | 613 (85.6%) | 0.11  |

|                                 |              |             |      |
|---------------------------------|--------------|-------------|------|
| Local anaesthesia, <i>n</i> (%) | 1448 (77.4%) | 530 (74.0%) | 0.08 |
| Contrast volume, mL             | 116.1±58.6   | 114.1±58.2  | 0.43 |
| Fluoroscopy time, min           | 21.4±11.4    | 21.2±10.5   | 0.66 |
| Procedure time, min             | 81.0±43.3    | 80.3±50.9   | 0.72 |

CT, computed tomography; eGFR, estimated glomerular filtration rate; NYHA, New York Heart Association; STS, Society of Thoracic Surgeons.

**Supplementary Table S2**

In-hospital outcomes of the propensity score-matched and -unmatched groups

|                                     | <b>Matched group</b><br><i>n</i> =1872 | <b>Unmatched group</b><br><i>n</i> =716 | <b><i>P</i>-value</b> |
|-------------------------------------|----------------------------------------|-----------------------------------------|-----------------------|
| All-cause mortality, <i>n</i> (%)   | 43 (2.3%)                              | 27 (3.8%)                               | <0.01                 |
| Acute kidney injury, <i>n</i> (%)   | 201 (10.7%)                            | 88 (12.3%)                              | 0.27                  |
| Bleeding, <i>n</i> (%)              | 421 (22.5%)                            | 199 (27.8%)                             | <0.01                 |
| Stroke, <i>n</i> (%)                | 43 (2.3%)                              | 18 (2.5%)                               | 0.75                  |
| Vascular complication, <i>n</i> (%) | 168 (9.0%)                             | 65 (9.1%)                               | 0.93                  |
